# Supplementary material for: Vitamin C may alleviate exercise-induced bronchoconstriction: a meta-analysis
Source: PubMed Central journal article supplement — BMJ Open. 2013 Jun 7;3(6):e002416. doi: 10.1136/bmjopen-2012-002416 (PMC3686214; doi:10.1136/bmjopen-2012-002416), 2013-06-07
Supplement: bmjopen-2012-002416.draft_revisions.pdf [file bmjopen-2012-002416.draft_revisions.pdf]

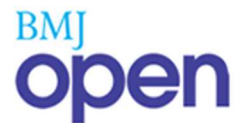

**Vitamin C may alleviate exercise-induced bronchoconstriction: a meta-analysis**

|                                 |                                                                    |
|---------------------------------|--------------------------------------------------------------------|
| Journal:                        | <i>BMJ Open</i>                                                    |
| Manuscript ID:                  | bmjopen-2012-002416                                                |
| Article Type:                   | Research                                                           |
| Date Submitted by the Author:   | 27-Nov-2012                                                        |
| Complete List of Authors:       | Hemilä, Harri; University of Helsinki, Department of Public Health |
| <b>Primary Subject Heading</b>: | Respiratory medicine                                               |
| Secondary Subject Heading:      | Sports and exercise medicine, Nutrition and metabolism             |
| Keywords:                       | Asthma < THORACIC MEDICINE, NUTRITION & DIETETICS, SPORTS MEDICINE |
|                                 |                                                                    |

SCHOLARONE™  
Manuscripts

Peer review only

Vitamin C may alleviate exercise-induced bronchoconstriction: a meta-analysis

Harri Hemilä

Department of Public Health, POB 41, University of Helsinki, Helsinki, Finland

Harri Hemilä, MD, PhD

Department of Public Health,  
POB 41 University of Helsinki  
Mannerheimintie 172  
FIN-00014 Helsinki  
Finland  
E-mail: harri.hemila@helsinki.fi

Words

Abstract 228

Text 2689

This research received no specific grant from any funding agency in the public, commercial or not-for-profit sectors

No conflicts of interest

#### ABBREVIATIONS

CI, confidence interval  
EIB, exercise-induced bronchoconstriction  
FEV<sub>1</sub>, forced expiratory volume in 1 second  
LT, leukotriene  
PG, prostaglandin

KEY WORDS: anti-asthmatic agents, asthma, exercise-induced asthma, forced expiratory flow rates, randomized controlled trial

**Abstract****Objective**

To determine whether vitamin C supplementation influences exercise-induced bronchoconstriction (EIB).

**Design**

Systematic review and meta-analysis

**Methods**

MEDLINE and Scopus were searched for placebo-controlled trials on vitamin C and EIB. The measures of vitamin C effect used in this study were: 1) the arithmetic difference and 2) the relative difference in the post-exercise FEV<sub>1</sub> decline between the vitamin C and placebo periods. The arithmetic differences were pooled by the inverse variance method. The relative effect of vitamin C was analyzed using linear regression for two studies that reported individual level data.

**Results**

Three placebo-controlled trials examining the effect of vitamin C on EIB were identified. In all they had 40 participants. The pooled effect estimate indicates a 10 percentage points smaller post-exercise FEV<sub>1</sub> decline when vitamin C was administered before exercise. Linear regression analysis of two studies found that vitamin C decreased the post-exercise FEV<sub>1</sub> decline by 50%. The mean values of the third trial were consistent with this estimate.

**Conclusions**

Given the safety of vitamin C and the positive findings in the three EIB studies, it seems reasonable for physically fit and active people to test vitamin C if they have respiratory symptoms such as cough associated with exercise. Further research on the effects of vitamin C on EIB are warranted.

## Article summary

### Article focus

- Exercise causes airway narrowing in about 10% of the general population and up to 50% of competitive athletes.
- Laboratory studies have indicated that vitamin C may have influence on bronchoconstriction.
- The aim of this study was to examine whether vitamin C influences FEV<sub>1</sub> decline caused by exercise.

### Key messages

- Physically active people may test vitamin C on an individual basis if they have respiratory symptoms such as cough associated with exercise.
- In future trials, linear modelling should be used to examine the effect of vitamin C on exercise-caused FEV<sub>1</sub> decline instead of simply calculating the effect of vitamin C on average FEV<sub>1</sub> decline.

### Strengths and limitations

- The included trials were methodologically satisfactory and their results were closely consistent.
- The included trials were small with 40 participants in all.

## Introduction

Exercise-induced bronchoconstriction (EIB) means a transient airway narrowing after or during exercise. Usually, an exercise induced FEV<sub>1</sub> decline of 10%, or greater, is classified as EIB.[1] The prevalence of EIB varies from about 10% in the general population, to about 50% in some fields of competitive athletics.[1] The pathophysiology of EIB is not well understood, but injury to the airways seems to lead to the release of inflammatory mediators, such as histamine, leukotrienes (LT), and prostaglandins (PG), which can cause bronchoconstriction.[1, 2] Increased levels of exhaled nitric oxide have also been association with EIB.[3]

There is evidence indicating that vitamin C has a role in the lungs. The production of various prostanoids in lung tissues is influenced by vitamin C, and vitamin C deficiency increases the level of bronchoconstrictor PGF<sub>2α</sub>. [4-6] An increase in airway hyperresponsiveness to histamine, which was further enhanced by indomethacin administration, was observed in guinea pigs on a diet deficient in vitamin C [6]. In isolated guinea pig trachea smooth muscle, vitamin C decreased the contractions caused by histamine, PGF<sub>2α</sub>, and carbamylcholine.[4, 7, 8]. Since indomethacin antagonized the effect of vitamin C on chemically-induced bronchoconstriction in humans [9, 10] and on the contractions of guinea pig tracheal muscle,[8] the effects of vitamin C might be, at least partly, mediated by alterations in PG metabolism. In humans, a 2-week vitamin C (1.5 g/d) administration decreased the post-exercise increase in the urinary markers for bronchoconstrictors LTC<sub>4</sub>-E<sub>4</sub> and PGD<sub>2</sub>, in addition to the decrease in post-exercise increase in exhaled nitric oxide,[11] Importance of vitamin C on the respiratory system is also indicated by its effects on the severity of upper and lower respiratory tract infections,[12-14] and by the decrease in common cold incidence in people under heavy acute physical stress.[14,15]

Previously, a systematic review examined the effect of vitamin C on exercise-induced

bronchoconstriction.[16] However, the review has severe errors in the extraction of data and data analysis.[17] The purpose of this systematic review is to examine whether vitamin C supplementation influences EIB.

1  
2  
3  
4  
5  
6  
7  
8  
9  
10  
11  
12  
13  
14  
15  
16  
17  
18  
19  
20  
21  
22  
23  
24  
25  
26  
27  
28  
29  
30  
31  
32  
33  
34  
35  
36  
37  
38  
39  
40  
41  
42  
43  
44  
45  
46  
47  
48  
49  
50  
51  
52  
53  
54  
55  
56  
57  
58  
59  
60

For peer review only

## Methods

### *Types of studies.*

Controlled trials, both randomised and non-randomised, were included in this systematic review.

Only placebo-controlled blinded trials were included, since the level of EIB might be affected by the patients' awareness of the treatment. Trials of children and adults of either gender and any age were considered eligible.

### *Types of interventions.*

The intervention considered was oral or intravenous administration of vitamin C (ascorbic acid or its salts) of at least 0.2 g daily for a single day or for a period. The dose limit was set as a pragmatic choice. If a trial with a low dose finds a negative result, the negative findings can be attributed to the low dose. Thus, trials with large doses are more critical for testing whether vitamin C is effective.

### *The outcome and the measure of vitamin C effect.*

The outcome in this meta-analysis is the relative FEV<sub>1</sub> decline caused by exercise (in percentage). The measures of vitamin C effect are: 1) the arithmetic difference in the post-exercise FEV<sub>1</sub> decline between the placebo and vitamin C periods; this is called the percentage point difference, and 2) the relative difference in the post-exercise FEV<sub>1</sub> decline between the vitamin C and placebo periods.

### *Literature searches.*

MEDLINE (OVID) was searched using MESH terms “ascorbic acid” and “exercise-induced asthma”. A similar search was carried out in Scopus. No language restrictions were used. The databases were searched from their inception to November 2012. The reference lists of identified trials and review articles were screened for additional references. See supplementary file 1 for the

1 flow diagram of the literature search.  
2  
3  
4  
5  
6

7 *Selection of studies and data extraction.*  
8

9 Five controlled trials reporting on vitamin C and EIB were identified. Three of them satisfied the  
10 selection criteria (Table I), whereas one was not placebo controlled [20] and one studied the  
11 combination of vitamins C and E.[21] The data of the three included trials were extracted. Authors  
12 were contacted when appropriate in order to obtain further data.  
13  
14  
15  
16  
17

18  
19  
20 Schachter and Schlesinger reported individual level FEV<sub>1</sub> measurements for a 12 participant cross-  
21 over study, in which the FEV<sub>1</sub> decline caused by exercise was calculated in this study (see  
22 Supplementary file 2).[18] Tecklenburg et al. reported the mean post-exercise FEV<sub>1</sub> decline for the  
23 vitamin C and placebo phases of an 8 participant cross-over study, but did not report the paired SD  
24 value for the mean difference between the two phases.[11] Dr. Tecklenburg was contacted, and she  
25 sent the paired SD value for the mean difference in the post-exercise FEV<sub>1</sub> decline.  
26  
27  
28  
29  
30  
31  
32  
33  
34

35 Cohen et al. reported FEV<sub>1</sub> values before and after exercise in only 11 of the 20 participants of a  
36 cross-over study; these 11 had been selected because of the disappearance of EIB during the  
37 trial.[19] Thus, the difference in FEV<sub>1</sub> decline by exercise between the vitamin C and placebo days  
38 can be calculated for these 11 participants (mean vitamin C effect 20.4 percentage points lower  
39 FEV<sub>1</sub> decline). Dr. Cohen was contacted, but he no longer retained the data. Therefore, to include  
40 the Cohen et al. trial in this meta-analysis, the FEV<sub>1</sub> values for the 9 participants needed to be  
41 imputed. First, an overall P-value corresponding to the reported distribution of the EIB and non-EIB  
42 cases on the vitamin C and placebo days was calculated (all were selected as suffering from EIB  
43 before the trial), assuming that on a second measurement 85% of the EIB cases are rediagnosed as  
44 EIB cases if there is no effective treatment. Second, this calculated P-value was then used as a  
45  
46  
47  
48  
49  
50  
51  
52  
53  
54  
55  
56  
57  
58  
59  
60



1  
2  
3  
4  
5  
6  
7  
8  
9  
10  
11  
12  
13  
14  
15  
16  
17  
18  
19  
20  
21  
22  
23  
24  
25  
26  
27  
28  
29  
30  
31  
32  
33  
34  
35  
36  
37  
38  
39  
40  
41  
42  
43  
44  
45  
46  
47  
48  
49  
50  
51  
52  
53  
54  
55  
56  
57  
58  
59  
60

constraint for generating a minimum level of vitamin C effect for the 9 participants so that the t-test gives the same P-value (see the Supplementary file 2 for the details of this imputation). As a sensitivity analysis, a conservative "no vitamin C effect" estimate was imputed to all the 9 participants with missing data and, using this second method of imputation, a pooled vitamin C effect was calculated for the three trials and a linear regression model was calculated for the Cohen et al. data. As a second type of sensitivity analysis, the Cohen et al. trial was excluded from the meta-analysis in Fig. 1 to examine whether its exclusion influences the conclusions.

### *Statistical analysis.*

The statistical heterogeneity in the percentage point effect of the three trials was assessed using the  $\chi^2$ -test and the  $I^2$ -statistic.[22] The latter examines the percentage of total variation across studies that is due to heterogeneity rather than chance. A value of  $I^2$  greater than about 70% indicates a high level of heterogeneity. Since the three identified trials showed no statistical heterogeneity, their results were pooled using the inverse variance method assuming fixed effect with program "metagen" of the R package (see the Supplementary file 2 for the details of the calculations).[23] The program "forest.meta" of the R package was used to construct the forest plot. For the examination of the relative effect of vitamin C, the relationship between the vitamin C and placebo phase post-exercise FEV<sub>1</sub> decline values was analyzed using the linear model "lm" program of the R package.[23]

The P-values for the 2 × 2 tables were calculated using the Fisher exact test. The 2-tailed P-values are presented in this text.

**Table I: Trials on vitamin C supplementation and exercise-induced bronchoconstriction**

| Study [ref.]                      |                   | Descriptions                                                                                                                                                                                                                                                                                                                                                                                          |
|-----------------------------------|-------------------|-------------------------------------------------------------------------------------------------------------------------------------------------------------------------------------------------------------------------------------------------------------------------------------------------------------------------------------------------------------------------------------------------------|
| Schachter & Schlesinger 1982 [18] | Methods:          | Randomized, double-blind, placebo-controlled, crossover trial                                                                                                                                                                                                                                                                                                                                         |
|                                   | Participants:     | 12 asthmatic subjects, selected from among workers of the Yale University in the USA, who had findings compatible with EIB "All twelve subjects gave a characteristic description of EIB."<br>5 Males, 7 Females; mean 26 yr (SD 5 yr).                                                                                                                                                               |
|                                   | Type of exercise: | Exercise by using a cycloergometer was begun at a constant speed of 20 km/h against zero workload. At the end of each 1 min interval, workload was increased by 150 kilopondmeters per min, keeping pedalling speed constant throughout the experiment. Exercise against progressively larger work loads was continued until either the heart rate reached 170 beats per min or the subject fatigued. |
|                                   | Intervention:     | On 2 subsequent days, the subjects ingested 0.5 g of vitamin C or sucrose placebo 1.5 h before the exercise. Washout overnight.                                                                                                                                                                                                                                                                       |
|                                   | Outcome:          | Change in FEV <sub>1</sub> was calculated as: [pre-exercise vs. 5 min post-exercise]. See the Supplementary file 2.                                                                                                                                                                                                                                                                                   |
|                                   | Notes:            | See the Supplementary file 2 for the calculation of vitamin C effect from the individual level data.                                                                                                                                                                                                                                                                                                  |
| Cohen et al. 1997 [19]            | Methods:          | Randomized, double-blind, placebo-controlled, crossover trial                                                                                                                                                                                                                                                                                                                                         |
|                                   | Participants:     | 20 asthmatic subjects in Israel. All of them had demonstrated EIB by having a decline of at least 15% in FEV <sub>1</sub> after a standard exercise test.<br>13 Males, 7 Females; age 7 to 28 yr (mean 14 yr)                                                                                                                                                                                         |
|                                   | Type of exercise: | A 7-minute exercise session using a motorized treadmill                                                                                                                                                                                                                                                                                                                                               |
|                                   | Intervention:     | 2 g of vitamin C or placebo 1 hour before the exercise. Washout 1 week.                                                                                                                                                                                                                                                                                                                               |
|                                   | Outcome:          | Change in FEV <sub>1</sub> was calculated as: [pre-exercise vs. 8 min post-exercise]. See the Supplementary file 2.                                                                                                                                                                                                                                                                                   |
|                                   | Notes:            | Individual level outcome was reported only for 11 participants of the 20 (Cohen's Table 2). Dr. Cohen was contacted, but he did not have the data any more. Therefore the outcome was imputed to the 9 participants; see the Supplementary file 2 for details.                                                                                                                                        |
| Tecklenburg et al. 2007 [11]      | Methods:          | Randomized, double-blind, placebo-controlled, crossover trial                                                                                                                                                                                                                                                                                                                                         |
|                                   | Participants:     | 8 subjects from a population of university students and the local community, Indiana USA, with physician-diagnosed mild to moderate asthma. All subjects had documented EIB as indicated by a drop of >10% in post-exercise FEV <sub>1</sub> . They also had a history of chest tightness, shortness of breath, and intermittent wheezing following exercise.<br>2 Males, 6 Females; mean 24.5 yr     |
|                                   | Type of exercise: | Subjects ran on a motorized treadmill, elevated 1% per min until 85% of age predicted max. heart rate and ventilation exceeding 40–60% of predicted max voluntary ventilation. Subjects maintained this exercise intensity for 6 min. Following the 6-min steady state exercise, the grade of the treadmill continued to increase at 1% per min until volitional exhaustion.                          |
|                                   | Intervention:     | 3 × 0.5 g capsules vitamin C or 3 × sucrose placebo capsules daily for 2 weeks. Washout 1 week.<br>Subjects were advised to avoid high vitamin C foods during the study.                                                                                                                                                                                                                              |
|                                   | Outcome:          | Change in FEV <sub>1</sub> was calculated as: [pre-exercise vs. the lowest value within 30 min post-exercise].                                                                                                                                                                                                                                                                                        |
|                                   | Notes:            | Dr. S. Tecklenburg kindly made the mean and SD for the paired FEV <sub>1</sub> decline available. For the decline in FEV <sub>1</sub> level, the mean difference was +6.5 percentage points (paired SD 7.4) in favour of vitamin C.                                                                                                                                                                   |

## Results

1  
2  
3  
4 Three randomized, placebo-controlled, double-blind, crossover trials that have examined the effect  
5 of vitamin C supplementation on the FEV<sub>1</sub> decline caused by exercise were retrieved. The  
6  
7 experimental conditions were similar (Table 1). In all the three trials had 40 participants. There is no  
8  
9 statistical heterogeneity between the three trials in the percentage points scale and thus the pooled  
10  
11 estimate of vitamin C effect was calculated (Fig. 1). Compared with the placebo phases, the post-  
12  
13 exercise FEV<sub>1</sub> decline was, on average, 10.2 percentage points less during the vitamin C phases  
14  
15 (95% CI: 6.7 to 14; P = 10<sup>-8</sup>).  
16  
17  
18  
19

20  
21  
22 In the Schachter and Schlesinger trial, the post-exercise FEV<sub>1</sub> decline was 17.6% after placebo, but  
23  
24 only 10.2% after vitamin C (0.5 g single dose), with a difference of 7.4 percentage points in favour  
25  
26 of vitamin C.[18] In the Tecklenburg et al. trial, the post-exercise FEV<sub>1</sub> decline was 12.9% when on  
27  
28 placebo, but only 6.4% when on vitamin C (1.5 g/d for 2 weeks), with a difference of 6.5  
29  
30 percentage points in favour of vitamin C.[11] With the imputed data for 9 participants, the Cohen et  
31  
32 al. trial gives a 14 percentage points lower post-exercise FEV<sub>1</sub> decline on the vitamin C day (2 g  
33  
34 single dose).[19]  
35  
36  
37  
38  
39

40 EIB is not a dichotomous condition, instead there is a continuous variation in the possible level of  
41  
42 FEV<sub>1</sub> decline caused by exercise. A single fixed percentage point estimate of vitamin C effect may  
43  
44 thus be simplistic. It is possible that a relative scale would better capture the effect of vitamin C.  
45  
46 Since Schachter and Schlesinger published individual level data for all their 12 participants,[18]  
47  
48 their data was analyzed using linear regression to examine the relationship between the post-  
49  
50 exercise FEV<sub>1</sub> decline on the vitamin C and placebo days (Fig. 2). The slope indicates 0.45 times as  
51  
52 high FEV<sub>1</sub> decline on the vitamin C day compared with the placebo day (95% CI for the slope: 0.21  
53  
54 to 0.67). This means a 55% lower post-exercise FEV<sub>1</sub> decline after vitamin C administration  
55  
56  
57  
58  
59  
60

1 compared with placebo. In the percentage points scale, the difference between vitamin C and  
2 placebo in the Schachter and Schlesinger trial is only marginally significant ( $P = 0.054$ ), whereas in  
3 the linear regression analysis, the difference between the two treatments is highly significant ( $P =$   
4  $0.0003$ ). Consequently, the relative effect scale better captures the effect of vitamin C on EIB.  
5  
6  
7

8  
9  
10  
11 Cohen et al. published individual level data for only 11 of their 20 participants (filled triangles in  
12 Fig. 3),<sup>[19]</sup> and data for 9 participants were imputed (open triangles in Fig. 3). Only participants  
13 who had post-exercise FEV<sub>1</sub> decline greater than 15% were included in the Cohen trial and  
14 therefore the horizontal variation in the Cohen data is narrow. Forcing the linear regression line  
15 through the origin indicates a 0.47 times as high post-exercise FEV<sub>1</sub> decline on the vitamin C day  
16 compared with the placebo day (95% CI for the slope: 0.29 to 0.65). This means a 53% lower post-  
17 exercise FEV<sub>1</sub> decline with vitamin C administration.  
18  
19  
20  
21  
22  
23  
24  
25

26  
27  
28  
29 Tecklenburg et al. did not report individual level data for their 8 participants and the data was not  
30 available.<sup>[11]</sup> The mean values give a ratio of 0.50 for the vitamin C compared with the placebo  
31 phase post-exercise FEV<sub>1</sub> decline (6.4% and 12.9% respectively). Thus, this study also found that  
32 vitamin C administration halved the EIB response.  
33  
34  
35  
36  
37  
38  
39

40 The primary imputation of the missing data for the 9 participants of the Cohen et al. trial was based  
41 on the calculation of a P-value corresponding to the reported distribution of EIB and non-EIB cases  
42 on the vitamin C and placebo days. To test the robustness of the conclusions to the method of  
43 imputation, a conservative "no vitamin C effect" was also imputed to the 9 participants. This  
44 approach gives a pooled vitamin C effect of 8.4 percentage points (95% CI: 4.6 to 12) for the three  
45 trials. The "no vitamin C effect" imputation for the 9 participants of Cohen et al. gives a slope  
46 indicating 0.58 times as high post-exercise FEV<sub>1</sub> decline on the vitamin C day compared with the  
47 placebo day (95% CI for the slope: 0.36 to 0.80). Both of these confidence intervals are close to  
48  
49  
50  
51  
52  
53  
54  
55  
56  
57  
58  
59  
60

1 those calculated with the primary imputation (see above) and thus the conclusions are robust to  
2 these two different imputation approaches.  
3  
4  
5

6 Finally, as a second sensitivity test, the Cohen et al. trial was excluded from the meta-analysis in  
7  
8 Fig. 1. The estimate of vitamin C effect became 6.8 percentage points (95% CI: 2.0 to 12; P =  
9 0.005) on the basis of the two remaining trials. Thus, the Cohen et al. trial imputations are not  
10 crucial for the conclusion that vitamin C influences EIB.  
11  
12  
13  
14  
15  
16  
17  
18  
19  
20  
21  
22  
23  
24  
25  
26  
27  
28  
29  
30  
31  
32  
33  
34  
35  
36  
37  
38  
39  
40  
41  
42  
43  
44  
45  
46  
47  
48  
49  
50  
51  
52  
53  
54  
55  
56  
57  
58  
59  
60

## Discussion

1  
2  
3  
4 In this meta-analysis of three randomized placebo-controlled double-blind trials, vitamin C was  
5 found to decrease the post-exercise FEV<sub>1</sub> decline, on average, by 10 percentage points (Fig. 1).  
6  
7

8  
9 Nevertheless, there is a great variation in the level of FEV<sub>1</sub> decline caused by exercise and therefore  
10 a single percentage point estimate of effect may not be reasonable. Linear regression analysis of the  
11 Schachter and Schlesinger data [18] indicated that it is better to analyze the role of vitamin C as a  
12 relative effect (Fig. 2), but full individual level data was not available for the other two trials.  
13  
14

15  
16 Nevertheless, all three trials are consistent with vitamin C halving the post-exercise FEV<sub>1</sub> decline.  
17

18  
19 The Cohen et al. study [19] required imputations to include it in the meta-analysis, however, its  
20 exclusion did not influence the conclusions. The three included studies indicate that 0.5 to 2 g of  
21 vitamin C before exercise may have a beneficial effect on many people suffering from EIB. All of  
22 the three trials were double-blind placebo-controlled randomized trials and risk of bias between the  
23 trial arms is low. The total number of participants in the three trials is only 40; however, low  
24 number of participants is a concern primarily when the results are negative, but less so when the  
25 results are statistically highly significant.  
26  
27  
28  
29  
30  
31  
32  
33  
34  
35  
36  
37

38 As to the effect of vitamin C on physically stressed people, a few studies on the common cold are  
39 relevant in parallel with the EIB trials. Although vitamin C supplementation had no preventive  
40 effect against colds in the general community, the vitamin halved the incidence of colds in five  
41 randomized placebo-controlled trials with participants under heavy acute physical stress.[14,15]  
42  
43

44  
45 Three of the trials were with marathon runners,[24-26] one with Canadian soldiers in a northern  
46 training exercise,[27] and one with schoolchildren in a skiing camp in the Swiss Alps.[28] In the  
47 general community, acute cough and sore throat usually indicates viral etiology. However, it is not  
48 obvious that such symptoms occurring after a marathon run are caused by a viral infection, as they  
49 can result from an injury to runners' airways caused by hours of exceptional ventilatory exertion.[2]  
50  
51  
52  
53  
54  
55  
56  
57  
58  
59  
60

1  
2  
3  
4  
5  
6  
7  
8  
9  
10  
11  
12  
13  
14  
15  
16  
17  
18  
19  
20  
21  
22  
23  
24  
25  
26  
27  
28  
29  
30  
31  
32  
33  
34  
35  
36  
37  
38  
39  
40  
41  
42  
43  
44  
45  
46  
47  
48  
49  
50  
51  
52  
53  
54  
55  
56  
57  
58  
59  
60

Thus, the three common cold studies of marathon runners may have been measuring, at least in part, the effect of vitamin C on the injury on their airways instead of the effect on viral infections.

In their trial with marathon runners, Peters et al. recorded the “self-reported symptoms including a running nose, sneezing, sore throat, cough” during a 2-week period after the race.[24] The incidence of post-race cough was reduced by 71% in the vitamin C group as compared to the placebo group ( $P = 0.02$ ; 4/43 vs. 13/41). The incidence of sore throat was reduced by 67% in the vitamin C group ( $P = 0.006$ ; 8/43 vs. 23/41). In contrast, vitamin C had no effect on the incidence of runny nose ( $P = 0.2$ ), which is a typical symptom of rhinovirus infections.[29,30] Peters et al. did not carry out virologic or pulmonary function tests in their study and therefore the etiology of cough and sore throat is uncertain.[24] In any case, there is no basis to assume that viruses were the only cause of respiratory symptoms after the marathon race. It is thus possible that the common cold studies with marathon runners have been measuring, at least in part, the effect of vitamin C on EIB type symptoms.

A recent study in Israel found that vitamin C halved the duration of common cold type symptoms in male adolescent competitive swimmers, but no benefit was seen in females.[31] Here too, etiology is unclear and the respiratory symptoms might as well have been caused, at least in part, by non-infectious irritation of swimmers' airways.

In evidence-based medicine the primary question is whether an intervention has effects on clinically relevant outcomes, such as symptoms like coughs. With such perspective, the etiology of respiratory symptoms is not of primary importance. Thus, in addition to the three EIB trials analyzed in this systematic review, six common cold trials have found benefit of vitamin C against respiratory symptoms of people under heavy physical stress. Given the safety of vitamin C,[32] and the consistency of positive findings in the nine EIB and common cold studies, it seems reasonable for

1 physically fit and active people to test vitamin C on an individual basis if they have respiratory  
2 symptoms such as cough associated with exercise.  
3  
4

5  
6 Promising results in the EIB and common cold trials indicate that further research on vitamin C and  
7 respiratory symptoms of physically active people are warranted. In future trials, statistical  
8  
9 modelling should be used to examine the effect of vitamin C on FEV<sub>1</sub> levels, instead of simply  
10  
11 calculating the percentage point estimates. Although the primary question in the evidence-based  
12  
13 medicine framework is to assess the effectiveness of vitamin C on clinically relevant outcomes, the  
14  
15 etiology of the respiratory symptoms should be investigated in the future trials.  
16  
17  
18  
19  
20  
21  
22  
23  
24  
25

## 26 **Acknowledgements**

27  
28  
29  
30  
31 I am grateful to Elizabeth Stovold for her contributions to an early version of this manuscript, by  
32  
33 helping in the literature searches, considering studies for inclusion, and extracting data for the meta-  
34  
35 analysis. She also helped in a critical revision of an early version of the manuscript.  
36  
37  
38  
39

## 40 **FUNDING**

41  
42 None  
43

## 44 **COMPETING INTERESTS**

45  
46 None  
47  
48

## 49 **DATA SHARING**

50  
51 All collected and imputed data are presented in Supplementary file 2 and will be freely available.  
52  
53  
54  
55  
56  
57  
58  
59  
60



## Legends to Figures

1  
2  
3  
4  
5  
6  
7 Fig. 1. Percentage point effect of vitamin C on FEV<sub>1</sub> decline caused by exercise.

8  
9 For the three trials, the vertical lines indicate the 95% CI and the box in the middle of the lines  
10 indicates the mean effect. The diamond shape at the bottom indicates the 95% CI for the pooled  
11 effect. Tests of heterogeneity:  $I^2 = 53\%$ ;  $\chi^2(2 \text{ df}) = 4.2$ ,  $P = 0.12$ .  
12  
13  
14  
15  
16

17  
18 Fig. 2. Comparison of post-exercise FEV<sub>1</sub> decline on vitamin C and placebo periods Schachter and  
19 Schelsinger trial.[18] The squares show the 12 participants of the trial; see the Supplementary file 2  
20 for the calculation of the FEV<sub>1</sub> declines. The thick black line indicate the linear regression line and  
21 the thin line indicates the identity of vitamin C and placebo treatments. For the linear regression  
22 model, the  $R^2 = 0.65$  and, compared with unity, the test of the slope gives  $P = 0.0003$ .  
23  
24  
25  
26  
27  
28  
29  
30  
31  
32

33 Fig. 3. Comparison of post-exercise FEV<sub>1</sub> decline on vitamin C and placebo periods in the Cohen et  
34 al. trial.[19] The filled triangles show the 11 participants of the for whom data was reported and the  
35 empty triangles show the 9 participants to whom data were imputed; see the Supplementary file 2  
36 for the imputation. The thick black line indicate the linear regression line and the thin line indicates  
37 the identity of vitamin C and placebo treatments. The linear regression line was forced through the  
38 origin, since the variation in the FEV<sub>1</sub> decline values is narrow.  
39  
40  
41  
42  
43  
44  
45  
46  
47  
48  
49  
50  
51  
52  
53  
54  
55  
56  
57  
58  
59  
60

## References

- 1 Weiler JM, Anderson SD, Randolph C. Pathogenesis, prevalence, diagnosis, and management of exercise-induced bronchoconstriction: a practice parameter. *Ann Allergy Asthma Immunol* 2010;105(6 Suppl):S1-47. doi:10.1016/j.anai.2010.09.021
- 2 Anderson SD, Kippelen P. Airway injury as a mechanism for exercise-induced bronchoconstriction in elite athletes. *J Allergy Clin Immunol* 2008;122:225-235. doi:10.1016/j.jaci.2008.05.001
- 3 Buchvald F, Hermansen MN, Nielsen KG, et al. Exhaled nitric oxide predicts exercise-induced bronchoconstriction in asthmatic school children. *Chest* 2005;128:1964-1967. doi:10.1378/chest.128.4.1964
- 4 Puglisi L, Berti F, Bosisio E, et al. Ascorbic acid and PGF<sub>2</sub> $\alpha$  antagonism on tracheal smooth muscle. *Adv Prostaglandin Tromboxane Res* 1976;1:503-506.
- 5 Rothberg KG, Hitchcock M: Effects of ascorbic acid deficiency on the in vitro biosynthesis of cyclooxygenase metabolites in guinea pig lungs. *Prostaglandins Leukot Med* 1983;12:137-147. doi:10.1016/0262-1746(83)90077-X
- 6 Mohsenin V, Tremml PG, Rothberg KG, et al. Airway responsiveness and prostaglandin generation in scorbutic guinea pigs. *Prostaglandins, Leukot Essent Fatty Acids* 1988;33:149-155.
- 7 Zuskin E, Lewis AJ, Bouhuys A. Inhibition of histamine-induced airway constriction by ascorbic acid. *J Allergy Clin Immunol* 1973;51:218-226. doi:10.1016/0091-6749(73)90141-3
- 8 Sipahi E, Ercan ZS. The mechanism of the relaxing effect of ascorbic acid in guinea pig isolated tracheal muscle. *Gen Pharmacol* 1997;28:757-760. doi:10.1016/S0306-3623(96)00277-7
- 9 Ogilvy CS, DuBois AB, Douglas JS. Effects of ascorbic acid and indomethacin on the airways of healthy male subjects with and without induced bronchoconstriction. *J Allergy*

- Clin Immunol 1981;67:363-369. doi:10.1016/0091-6749(81)90081-6
- 1  
2  
3  
4  
5  
6  
7  
8  
9  
10  
11  
12  
13  
14  
15  
16  
17  
18  
19  
20  
21  
22  
23  
24  
25  
26  
27  
28  
29  
30  
31  
32  
33  
34  
35  
36  
37  
38  
39  
40  
41  
42  
43  
44  
45  
46  
47  
48  
49  
50  
51  
52  
53  
54  
55  
56  
57  
58  
59  
60
- 10 Mohsenin V, Dubois AB, Douglas JS. Effect of ascorbic acid on response to methacholine challenge in asthmatic subjects. *Am Rev Respir Dis* 1983;127:143-147.
- 11 Tecklenburg SL, Mickleborough TD, Fly AD, et al. Ascorbic acid supplementation attenuates exercise-induced bronchoconstriction in patients with asthma. *Respir Med* 2007;101:1770-1778. doi:10.1016/j.rmed.2007.02.014
- 12 Hemilä H. Vitamin C supplementation and common cold symptoms: problems with inaccurate reviews. *Nutrition* 1996;12:804-809. doi:10.1016/S0899-9007(96)00223-7
- 13 Hemilä H, Louhiala P. Vitamin C may affect lung infections. *J R Soc Med* 2007;100:495-498. doi:10.1258/jrsm.100.11.495
- 14 Hemilä H, Chalker E, Douglas B. Vitamin C for preventing and treating the common cold. *Cochrane Database Syst Rev* 2007;(3):CD000980. doi:10.1002/14651858.CD000980.pub3
- 15 Hemilä H. Vitamin C and common cold incidence: a review of studies with subjects under heavy physical stress. *Int J Sports Med* 1996;17:379-383. doi:10.1055/s-2007-972864
- 16 Kaur B, Rowe BH, Arnold E. Vitamin C supplementation for asthma. *Cochrane Database Syst Rev* 2009;(1):CD000993. doi:10.1002/14651858.CD000993.pub3
- 17 Hemilä H. Feedback. In: Kaur B, Rowe BH, Arnold E. Vitamin C supplementation for asthma. *Cochrane Database Syst Rev* 2009;(1):CD000993. doi:10.1002/14651858.CD000993.pub3
- 18 Schachter EN, Schlesinger A. The attenuation of exercise-induced bronchospasm by ascorbic acid. *Ann Allergy* 1982;49:146-151.
- 19 Cohen HA, Neuman I, Nahum H. Blocking effect of vitamin C in exercise-induced asthma. *Arch Pediatr Adolescent Med* 1997;151:367-70. doi:10.1001/archpedi.1997.02170410041005
- 20 Miric M, Haxhiu MA. Effect of vitamin C on exercise-induced bronchoconstriction [Serbo-Croatian]. *Plucne Bolesti* 1991;43:94-97.
- 21 Murphy JD, Ferguson CS, Brown KR, et al. The effect of dietary antioxidants on lung

- function in exercise induced asthma [abstract]. *Med Sci Sports Exerc* 2002;34(5 Suppl):S155.
- 22 Higgins JPT, Thompson SG, Deeks JJ, et al. Measuring inconsistency in meta-analysis. *BMJ* 2003;327:557-560. doi:10.1136/bmj.327.7414.557
- 23 The R Project for Statistical Computing. <http://www.r-project.org/> (accessed 26 Nov 2012)
- 24 Peters EM, Goetzsche JM, Grobbelaar B, et al. Vitamin C supplementation reduces the incidence of postrace symptoms of upper-respiratory-tract infection in ultramarathon runners. *Am J Clin Nutr* 1993;57:170-174.
- 25 Peters EM, Goetzsche JM, Joseph LE, et al. Vitamin C as effective as combinations of anti-oxidant nutrients in reducing symptoms of upper respiratory tract infection in ultramarathon runners. *S Afr J Sports Med* 1996;11:23-27.
- 26 Moolla ME. The effect of supplemental anti-oxidants on the incidence and severity of upper respiratory tract infections in ultra-marathon runners [MSc Thesis]. South Africa: University of Cape Town; 1996.
- 27 Sabiston BH, Radomski MW. Health Problems and Vitamin C in Canadian Northern Military Operations. DCIEM Report no. 74-R-1012. Downsview, Ontario, Canada: Defence and Civil Institute of Environmental Medicine; 1974, 10 pp. Available at: [http://www.mv.helsinki.fi/home/hemila/CC/Sabiston\\_1974\\_ch.pdf](http://www.mv.helsinki.fi/home/hemila/CC/Sabiston_1974_ch.pdf) (accessed 26 Nov 2012)
- 28 Ritzel G. Critical analysis of the role of vitamin C in the treatment of the common cold [in German]. *Helv Med Acta* 1961;28:63-68. Translation at: <http://www.mv.helsinki.fi/home/hemila/T3.pdf> (accessed 26 Nov 2012)
- 29 Rao SS, Hendley JO, Hayden FG, et al. Symptom expression in natural and experimental rhinovirus colds. *Am J Rhinol* 1995;9:49-52. doi:10.2500/105065895781874114
- 30 Arruda E, Pitkäranta A, Witek TJ Jr, et al. Frequency and natural history of rhinovirus infections in adults during autumn. *J Clin Microbiol* 1997;35:2864-2868.
- 31 Constantini NW, Dubnov-Raz G, Eyal BB, et al. The effect of vitamin C on upper respiratory infections in adolescent swimmers: a randomized trial. *Eur J Pediatr* 2011;170:59-63.

doi:10.1007/s00431-010-1270-z

- 1  
2  
3  
4  
5  
6  
7  
8  
9  
10  
11  
12  
13  
14  
15  
16  
17  
18  
19  
20  
21  
22  
23  
24  
25  
26  
27  
28  
29  
30  
31  
32  
33  
34  
35  
36  
37  
38  
39  
40  
41  
42  
43  
44  
45  
46  
47  
48  
49  
50  
51  
52  
53  
54  
55  
56  
57  
58  
59  
60
- 32 Hathcock JN, Azzi A, Blumberg J, et al. Vitamins E and C are safe across a broad range of intakes. *Am J Clin Nutr* 2005;81:736-745.

For peer review only

1  
2  
3  
4  
5  
6  
7  
8  
9  
10  
11  
12  
13  
14  
15  
16  
17  
18  
19  
20  
21  
22  
23  
24  
25  
26  
27  
28  
29  
30  
31  
32  
33  
34  
35  
36  
37  
38  
39  
40  
41  
42  
43  
44  
45  
46  
47  
48  
49  
50  
51  
52  
53  
54  
55  
56  
57  
58  
59  
60

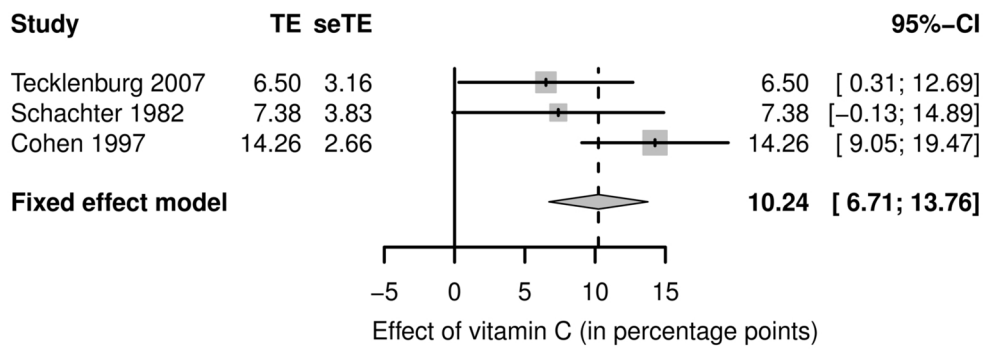

67x26mm (600 x 600 DPI)

Peer review only

1  
2  
3  
4  
5  
6  
7  
8  
9  
10  
11  
12  
13  
14  
15  
16  
17  
18  
19  
20  
21  
22  
23  
24  
25  
26  
27  
28  
29  
30  
31  
32  
33  
34  
35  
36  
37  
38  
39  
40

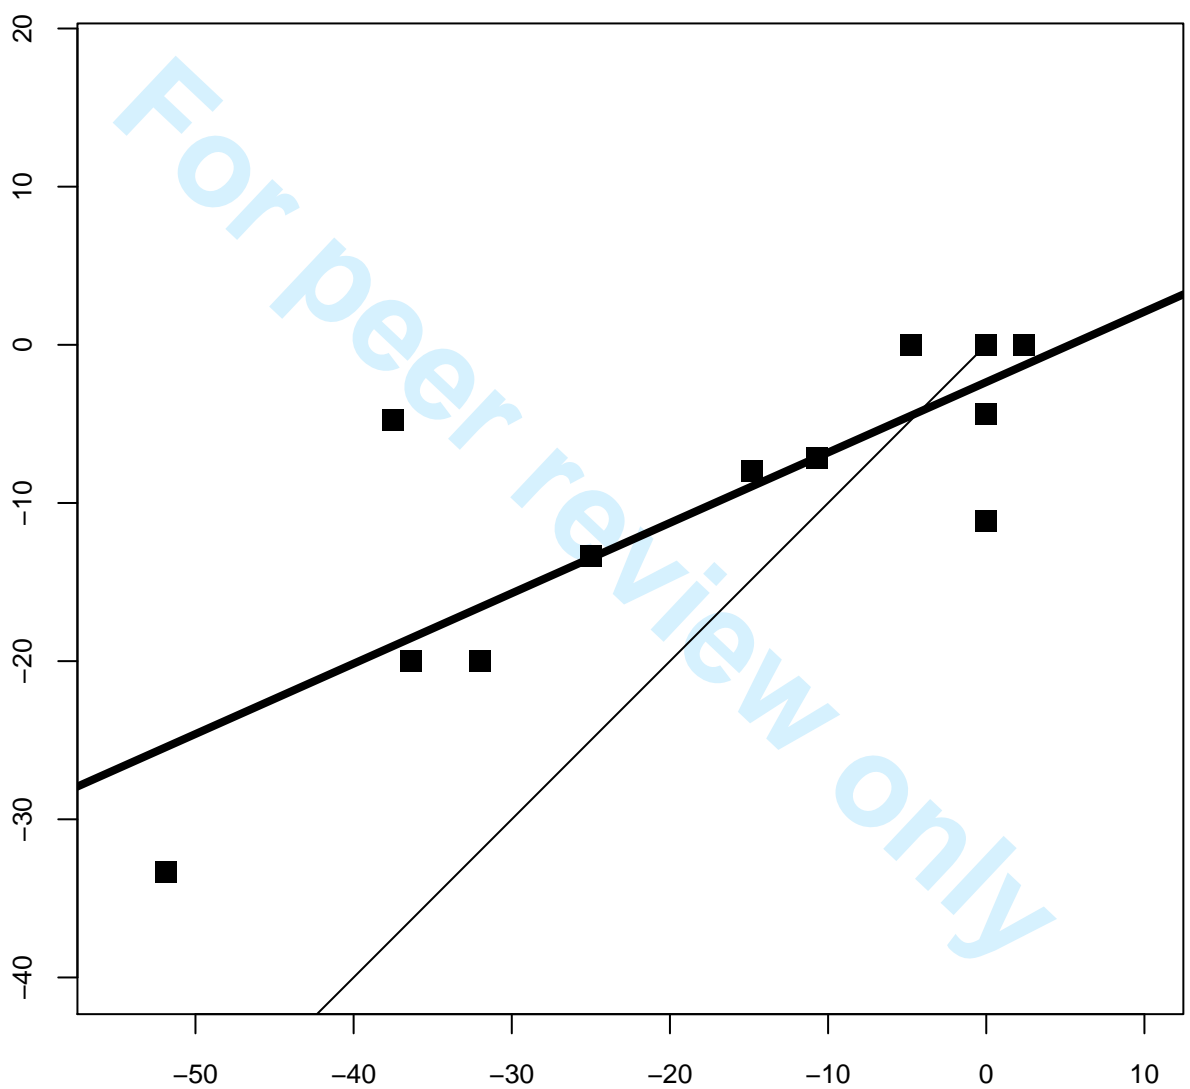

For peer review only - <http://bmjopen.bmj.com/site/about/guidelines.xhtml>

FEV1 decline caused by exercise when on placebo (%)

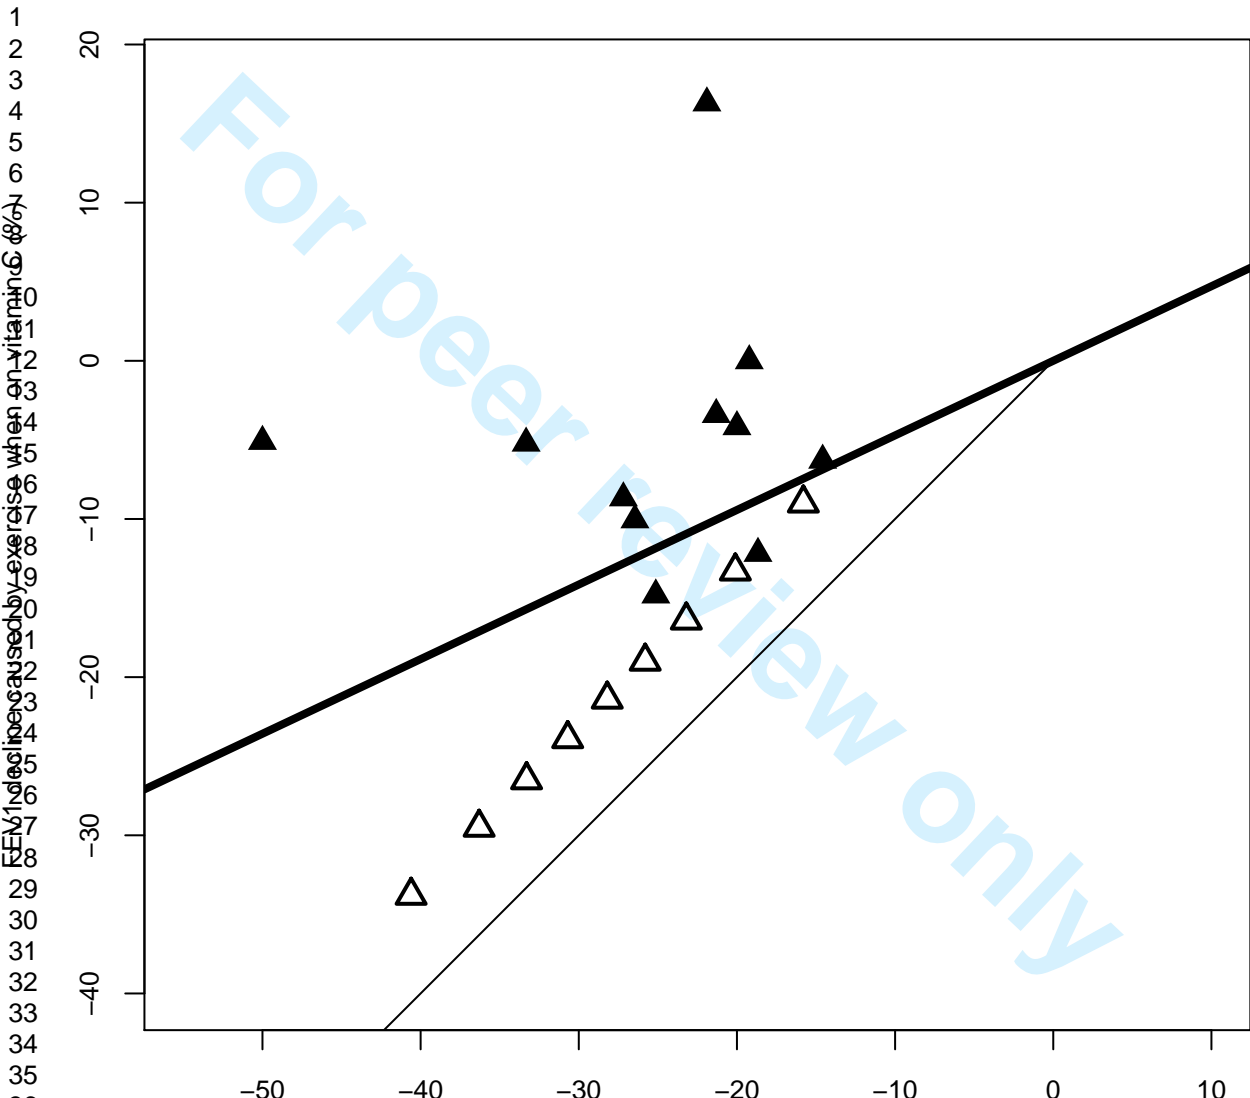

For peer review only - <http://bmjopen.bmj.com/site/about/guidelines.xhtml>

FEV1 decline caused by exercise when on placebo (%)



Hemilä H: Vitamin C and exercise-induced bronchoconstriction: a meta-analysis

Flow diagram of the literature search 27 Nov 2012

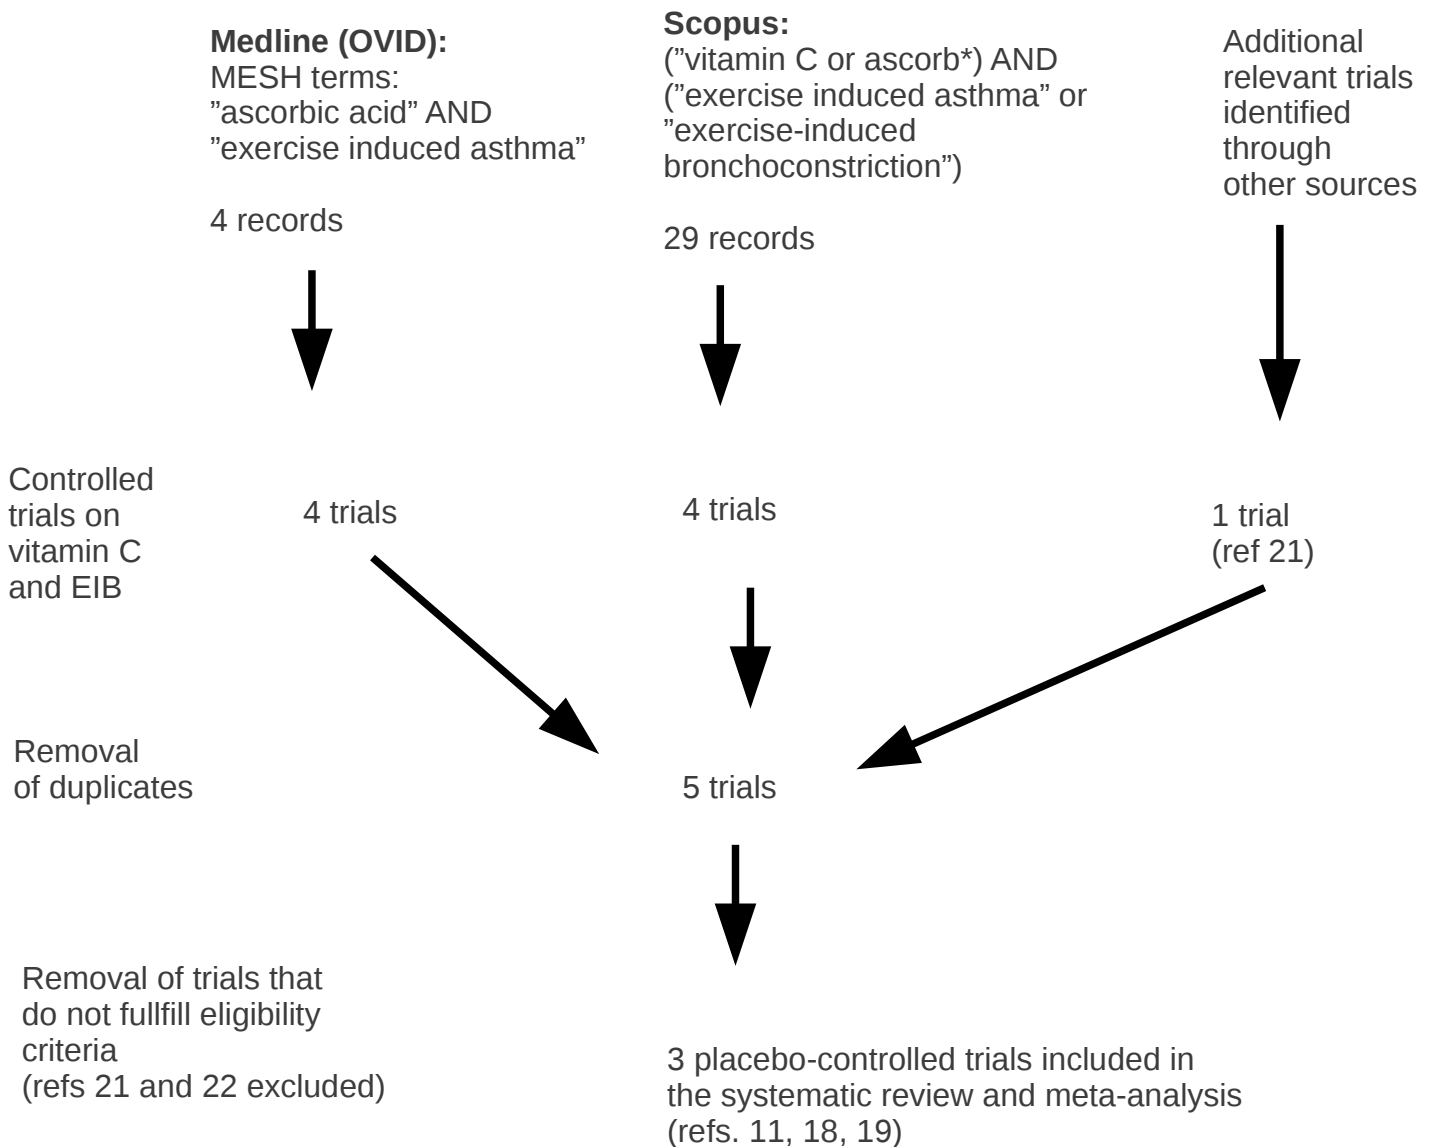

## Cohen 1997 Imputation of the missing values for 9 participants

<http://www.ncbi.nlm.nih.gov/pubmed/9111435>

<http://dx.doi.org/10.1001/archpedi.1997.02170410041005>

These sheets describe two different methods used for the imputation of data for 9 participants of the Cohen 1997 study who had missing data.

Cohen studied 20 participants who had EIB because of inclusion criteria.

On their Table 2, Cohen et al. 1997 reported the FEV1 decline caused by exercise for 11 participants on the vitamin C and placebo days.

The individual level differences between the vitamin C and placebo days can thus be calculated for these 11 participants.

Similar data is not available for the remaining 9 participants.

To include the Cohen 1997 study in the meta-analysis, we need to impute the results for the 9 participants missing from Cohen's Table 2.

Some characteristics and diseases are permanent and can be accurately diagnosed, e.g. sex and many genetic diseases.

However, EIB is not permanent nor highly accurate.

Cohen defined EIB as a "decline of at least 15% in FEV1" because of exercise.

Therefore it is not surprising that all 20 participants had EIB response on the placebo day.

Nevertheless, this does not mean that the initial EIB diagnosis was 100% accurate and EIB was a permanent characteristic of the participants.

Lets assume that 95% of the selected participants had EIB on the second exercise test.

If  $P(\text{rediagnosis}) = 0.95$ , then a series of repeated 20 EIB findings is highly likely:  $P(20 \text{ EIB cases; 1-tail}) 0.95^{20} = 0.4$

Nevertheless, such a high probability for a rediagnosis seems unrealistic.

Lets assume a lower accuracy so that on average 80% of the set of participants had EIB on the second exercise test.

If  $P(\text{rediagnosis}) = 0.80$ , then a series of repeated 20 EIB findings is highly unlikely:  $P(20 \text{ EIB cases; 1-tail}) 0.80^{20} = 0.012$

Thus, if  $P(\text{rediagnosis})$  is lower than 80%, the probability for observing 20 EIB cases on the placebo day becomes more and more unlikely.

Yet, given that all 20 participants were selected as EIB cases, the probability of all of them having EIB on a second measurement cannot be ve

Between the above extreme values for  $P(\text{rediagnosis})$ , there are values that will provide a reasonable basis for the imputation.

The lower  $P(\text{rediagnosis})$  we assume, the more conservative our imputation will be.

However, low levels of  $P(\text{rediagnosis})$  are not compatible with all participants having EIB as an inclusion criterion and on the placebo day.

Cohen reported, that:

- a) on the placebo day, all 20 participants showed EIB response (Cohen Fig 2)
- b) on the vitamin C day, 11 participants did not show EIB response (listed in Table 2)

The latter is not correct, however:

Cohen listed participant #10 as a "positive result", yet the FEV1 decline on the vitamin C day was 15%

Cohen writes in Methods that "Demonstrated [EIB] by having a decline of at least 15% in FEV1"

Thus, the borderline case (15%) should be classified as an EIB case. In this imputation #10 is classified as an EIB case on the vitamin C day

Below, a small set of probabilities for re-diagnosing a single participant as an EIB case "P(rediagnosis)" is selected, and the calculation gives the probability of getting:

- a) the 20 EIB observations on the placebo day
- b) the 10-10 split on the vitamin C day
- c) the combined probability for 20-0 and 10-10 on the placebo and vitamin C days, respectively.

Based on the calculations below, P(rediagnosis) = 0.85 was selected as the basis for the imputation

calculating the total probability for the 20-0 and 10-10 splits on the placebo and vitamin C days

The selected 85% level makes the placebo day observation marginally unlikely, but not highly unlikely.

| Single person probability for being re-diagnosed as an EIB case on a second test | Placebo day                       | Vit C day                          | For the binomial distribution:     |                                                       |
|----------------------------------------------------------------------------------|-----------------------------------|------------------------------------|------------------------------------|-------------------------------------------------------|
|                                                                                  | Probability for 20 EIB + 0 No-EIB | Probability for 10 EIB + 10 No-EIB | 20 No. Participants                | 10 No. EIB on vit C day                               |
| P(rediagnosis)                                                                   | $Pr^{20}$                         | Binomial                           |                                    |                                                       |
| Pr                                                                               | P-plac                            | P-vitC                             | P(total; 1-tail) = P-plac × P-vitC |                                                       |
| 0.95                                                                             | 0.36                              | 0.0000001                          | 0.00000004                         |                                                       |
| 0.90                                                                             | 0.12                              | 0.000007                           | 0.000009                           |                                                       |
| <b>0.85</b>                                                                      | <b>0.0388</b>                     | <b>0.00021</b>                     | <b>0.000081</b>                    | <b>&lt; main imputation is based on this P(total)</b> |
| 0.80                                                                             | 0.012                             | 0.0026                             | 0.000030                           |                                                       |
| 0.75                                                                             | 0.003                             | 0.0139                             | 0.000044                           |                                                       |

1  
2  
3  
4  
5  
6  
7  
8  
9  
10  
11  
12  
13  
14  
15  
16  
17  
18  
19  
20  
21  
22  
23  
24  
25  
26  
27  
28  
29  
30  
31  
32  
33  
34  
35  
36  
37  
38  
39  
40  
41  
42  
43  
44  
45  
46  
47  
48  
49

### Imputation of the 9 missing FEV1 decline values

#### Using the P-value calculated above as the constraint for the t-test

Here we impute a fixed difference in FEV1 value for each of the Cohen's 9 participants with missing data, so that the P(1-tail) from the t-test is the same as the P(total; 1-tail) calculated above

| Patient         | Reported FEV1 decline |                                                      | Treatment effect<br>in percentage points |                                    |             |
|-----------------|-----------------------|------------------------------------------------------|------------------------------------------|------------------------------------|-------------|
|                 | Placebo day<br>(%)    | Vit C day<br>(%)                                     |                                          |                                    |             |
| <b>Reported</b> |                       |                                                      |                                          |                                    |             |
| 1               | -26                   | -10                                                  | 16                                       | <b>For the 11 participants</b>     |             |
| 2               | -50                   | -5                                                   | 45                                       |                                    |             |
| 3               | -33                   | -5                                                   | 28                                       | Mean =                             | 20.36       |
| 4               | -27                   | -9                                                   | 18                                       | SD =                               | 12.01       |
| 5               | -21                   | -3                                                   | 18                                       | SE =                               | 3.62        |
| 6               | -15                   | -6                                                   | 9                                        | t(10 df) =                         | 5.62        |
| 7               | -19                   | 0                                                    | 19                                       | P(1-tail) =                        | 0.00011     |
| 8               | -22                   | 16                                                   | 38                                       |                                    |             |
| 9               | -20                   | -4                                                   | 16                                       |                                    |             |
| 10              | -25                   | -15                                                  | 10                                       |                                    |             |
| 11              | -19                   | -12                                                  | 7                                        |                                    |             |
| <b>Imputed</b>  |                       |                                                      |                                          |                                    |             |
| 12              |                       |                                                      | <b>6.79</b>                              |                                    |             |
| 13              |                       |                                                      | <b>6.79</b>                              |                                    |             |
| 14              |                       |                                                      | <b>6.79</b>                              | <b>For all the 20 participants</b> |             |
| 15              |                       | the 9 missing values:<br>percentage point difference | <b>6.79</b>                              |                                    |             |
| 16              |                       | in the FEV1 decline between                          | <b>6.79</b>                              | Mean =                             | <b>14.3</b> |
| 17              |                       | the vit C and placebo days=<br>6.79                  | <b>6.79</b>                              | SD =                               | <b>11.1</b> |
| 18              |                       |                                                      | <b>6.79</b>                              | SE =                               | 2.49        |
| 19              |                       |                                                      | <b>6.79</b>                              | t(19 df) =                         | 5.73        |
| 20              |                       |                                                      | <b>6.79</b>                              | P(1-tail) =                        | 0.0000081   |

Thus, 6.79 percentage point difference for the 9 missing data leads to the P(total; 1-tail) calculated with P(rediagnosis) = 0.85

1  
2 **Imputation of the 9 missing FEV1 decline values**

3  
4  
5 **Sensitivity analysis, imputing “no vitamin C effect” for the 9 participants with missing data**

6  
7 Here we assume that vitamin C had no effect on the 9 participants with missing data

8  
9  
10

| Patient         | Reported FEV1 decline |           | Treatment effect<br>in percentage points |                                    |             |
|-----------------|-----------------------|-----------|------------------------------------------|------------------------------------|-------------|
|                 | Placebo day           | Vit C day |                                          |                                    |             |
| <b>Reported</b> |                       |           |                                          |                                    |             |
| 1               | -26                   | -10       | 16                                       | <b>For the 11 participants</b>     |             |
| 2               | -50                   | -5        | 45                                       |                                    |             |
| 3               | -33                   | -5        | 28                                       | Mean =                             | 20.36       |
| 4               | -27                   | -9        | 18                                       | SD =                               | 12.01       |
| 5               | -21                   | -3        | 18                                       | SE =                               | 3.62        |
| 6               | -15                   | -6        | 9                                        | t(10 df) =                         | 5.62        |
| 7               | -19                   | 0         | 19                                       | P(1-tail) =                        | 0.00011     |
| 8               | -22                   | 16        | 38                                       |                                    |             |
| 9               | -20                   | -4        | 16                                       |                                    |             |
| 10              | -25                   | -15       | 10                                       |                                    |             |
| 11              | -19                   | -12       | 7                                        |                                    |             |
| <b>Imputed</b>  |                       |           |                                          |                                    |             |
| 12              |                       |           | 0                                        | <b>For all the 20 participants</b> |             |
| 13              |                       |           | 0                                        |                                    |             |
| 14              |                       |           | 0                                        | Mean =                             | <b>11.2</b> |
| 15              |                       |           | 0                                        | SD =                               | <b>13.6</b> |
| 16              |                       |           | 0                                        | SE =                               | 3.03        |
| 17              |                       |           | 0                                        | t(19 df) =                         | 3.69        |
| 18              |                       |           | 0                                        | P(1-tail) =                        | 0.00077     |
| 19              |                       |           | 0                                        |                                    |             |
| 20              |                       |           | 0                                        |                                    |             |

21  
22  
23  
24  
25  
26  
27  
28  
29  
30  
31  
32  
33  
34  
35  
36  
37  
38  
39  
40  
41  
42  
43  
44  
45  
46  
47  
48  
49

**Bold Mean and SD values  
are used in sheet Fig. 1  
for sensitivity analysis**

1  
2  
3  
4  
5  
6  
7  
8  
9  
10  
11  
12  
13  
14  
15  
16  
17  
18  
19  
20  
21  
22  
23  
24  
25  
26  
27  
28  
29  
30  
31  
32  
33  
34  
35  
36  
37  
38  
39  
40  
41  
42  
43  
44  
45  
46  
47  
48  
49

The “no vitamin C effect” imputation leads to Mean = 11.2 and SE = 3.03 for the whole set of 20 participants  
These Mean and SD values lead to the following pooled estimate and CI values (see sheet Fig. 1):

|                     | <b>Sensitivity analysis</b><br>“No vitamin C effect”<br>imputation<br>for the 9 participants | <b>Main analysis</b><br>based on the<br>P(rediagnosis) = 0.85<br>imputation<br>for the 9 participants |
|---------------------|----------------------------------------------------------------------------------------------|-------------------------------------------------------------------------------------------------------|
| Pooled mean effect: | 8.4                                                                                          | 10.2                                                                                                  |
| Pooled 95%CI:       | 4.6-12.3                                                                                     | 6.7-13.8                                                                                              |

Thus, the two imputation approaches do not lead to a considerable difference in the pooled CI for the three EIB trials

**Imputation of the placebo day FEV1 decline values**

In Table 1, Cohen reported the mean pre- and post-exercise FEV1 values (L) for the placebo day for all 20 participants  
 The mean values for the 20 participants can be used to calculate the mean FEV1 decline on the placebo day for the 9 participants with missing  
 This calculation is done to reach a realistic horizontal spread for the 9 participants

| Patient number | Before Exercise (L) |                                                                                                            | After Exercise (L) | Reported Decrease |                |                |
|----------------|---------------------|------------------------------------------------------------------------------------------------------------|--------------------|-------------------|----------------|----------------|
| 1              | 1.55                | <b>11 Reported</b><br>in Cohen's Table 2<br><br>Mean decline for the 11 published =<br>-25.3%<br>SD = 9.6% | 1.14               | -26%              |                |                |
| 2              | 1.54                |                                                                                                            | 0.77               | -50%              |                |                |
| 3              | 2.22                |                                                                                                            | 1.48               | -33%              |                |                |
| 4              | 1.95                |                                                                                                            | 1.42               | -27%              |                |                |
| 5              | 2.44                |                                                                                                            | 1.92               | -21%              |                |                |
| 6              | 2.04                |                                                                                                            | 1.75               | -15%              |                |                |
| 7              | 2.55                |                                                                                                            | 2.06               | -19%              |                |                |
| 8              | 1.05                |                                                                                                            | 0.82               | -22%              |                |                |
| 9              | 1.10                |                                                                                                            | 0.88               | -20%              |                |                |
| 10             | 3.82                |                                                                                                            | 2.86               | -25%              |                |                |
| 11             | 3.91                |                                                                                                            | 3.18               | -19%              |                |                |
| 12 to 20       | <b>2.558</b>        | <b>&lt; Imputed &gt;</b><br>Mean decline for the 9 imputed =<br>-28.2%                                     | <b>1.836</b>       |                   | <b>Imputed</b> | <b>P-value</b> |
| 12             |                     |                                                                                                            |                    |                   | <b>-15.9%</b>  | 0.9            |
| 13             |                     |                                                                                                            |                    |                   | <b>-20.1%</b>  | 0.8            |
| 14             |                     |                                                                                                            |                    |                   | <b>-23.2%</b>  | 0.7            |
| 15             |                     |                                                                                                            |                    |                   | <b>-25.8%</b>  | 0.6            |
| 16             |                     |                                                                                                            |                    |                   | <b>-28.2%</b>  | 0.5            |
| 17             |                     |                                                                                                            |                    |                   | <b>-30.7%</b>  | 0.4            |
| 18             |                     |                                                                                                            |                    |                   | <b>-33.3%</b>  | 0.3            |
| 19             |                     |                                                                                                            |                    |                   | <b>-36.3%</b>  | 0.2            |
| 20             |                     |                                                                                                            |                    |                   | <b>-40.6%</b>  | 0.1            |
| Mean for 20:   | 2.360               | <From the above imputation><br>Cohen Table 1                                                               | 1.740              |                   |                |                |
| Mean for 20:   | 2.36                | <reported these mean values:                                                                               | 1.74               |                   |                |                |

The above 9 imputed FEV1 decrease values are used in Fig. 2A to show the horizontal spread of the participants with missing values

Generation of the normal distribution with mean = -28.2% and SD = 9.6% for the 9 participants with missing data is done with the help of these equally spaced P-values using the NORMINV function

1  
2  
3  
4  
5  
6  
7  
8  
9  
10  
11  
12  
13  
14  
15  
16  
17  
18  
19  
20  
21  
22  
23  
24  
25  
26  
27  
28  
29  
30  
31  
32  
33  
34  
35  
36  
37  
38  
39  
40  
41  
42  
43  
44  
45  
46  
47  
48  
49

### Schachter and Schlesinger 1982

http://www.ncbi.nlm.nih.gov/pubmed/7114587

Schachter (1982) Table III gives the FEV1 decline: ch\_FEV1 values (L)  
Schachter (1982) Table V gives the baseline FEV1 values: base\_FEV1 (L)

diff\_ch\_FEV1  
means the  
vit C vs Placebo difference  
in ch-FEV1

| No.  | Placebo day                                       |                                                   |              | Vitamin C day                                     |                                                   |              | Absolute<br>diff_ch_FEV1 | Difference<br>in FEV1 decline<br>(in percentage points)<br>Treatment effect<br>TE=F-C |
|------|---------------------------------------------------|---------------------------------------------------|--------------|---------------------------------------------------|---------------------------------------------------|--------------|--------------------------|---------------------------------------------------------------------------------------|
|      | Change in pre-exercise<br>FEV1<br>(L)<br><b>A</b> | Change in pre-exercise<br>FEV1<br>(L)<br><b>B</b> | <b>C=A/B</b> | Change in pre-exercise<br>FEV1<br>(L)<br><b>D</b> | Change in pre-exercise<br>FEV1<br>(L)<br><b>E</b> | <b>F=D/E</b> |                          |                                                                                       |
| 1    | -0.3                                              | 2.8                                               | -10.7%       | -0.2                                              | 2.8                                               | -7.1%        | 0.1                      | 3.6%                                                                                  |
| 2    | -0.7                                              | 2.8                                               | -25.0%       | -0.4                                              | 3.0                                               | -13.3%       | 0.3                      | 11.7%                                                                                 |
| 3    | -0.8                                              | 2.2                                               | -36.4%       | -0.4                                              | 2.0                                               | -20.0%       | 0.4                      | 16.4%                                                                                 |
| 4    | -0.9                                              | 2.4                                               | -37.5%       | -0.1                                              | 2.1                                               | -4.8%        | 0.8                      | 32.7%                                                                                 |
| 5    | 0.0                                               | 2.9                                               | 0.0%         | 0.0                                               | 2.4                                               | 0.0%         | 0.0                      | 0.0%                                                                                  |
| 6    | 0.0                                               | 2.8                                               | 0.0%         | -0.3                                              | 2.7                                               | -11.1%       | -0.3                     | -11.1%                                                                                |
| 7    | 0.0                                               | 2.9                                               | 0.0%         | -0.1                                              | 2.3                                               | -4.3%        | -0.1                     | -4.3%                                                                                 |
| 8    | -0.1                                              | 2.1                                               | -4.8%        | 0.0                                               | 1.8                                               | 0.0%         | 0.1                      | 4.8%                                                                                  |
| 9    | -0.4                                              | 2.7                                               | -14.8%       | -0.2                                              | 2.5                                               | -8.0%        | 0.2                      | 6.8%                                                                                  |
| 10   | 0.1                                               | 4.2                                               | 2.4%         | 0.0                                               | 4.4                                               | 0.0%         | -0.1                     | -2.4%                                                                                 |
| 11   | -1.4                                              | 2.7                                               | -51.9%       | -0.7                                              | 2.1                                               | -33.3%       | 0.7                      | 18.5%                                                                                 |
| 12   | -0.8                                              | 2.5                                               | -32.0%       | -0.5                                              | 2.5                                               | -20.0%       | 0.3                      | 12.0%                                                                                 |
| Mean | -0.442                                            |                                                   | -17.6%       | -0.242                                            |                                                   | -10.2%       | 0.200                    | <b>7.383%</b>                                                                         |
| SD   | 0.474                                             |                                                   |              | 0.223                                             |                                                   |              | 0.325                    | <b>11.826%</b>                                                                        |
| SE   | 0.137                                             |                                                   |              | 0.065                                             |                                                   |              | 0.094                    | 3.414%                                                                                |

**Bold Mean and SD values  
are used in sheet Fig. 1  
and TE is modelled as a fur  
of C in Fig 2A**



## Tecklenburg 2007

<http://www.ncbi.nlm.nih.gov/pubmed/17412579>

<http://dx.doi.org/10.1016/j.rmed.2007.02.014>

### Change in FEV1 caused by exercise

Sandra Lunds email Jan 7, 2010:

“Here is the data you requested.  
The average difference score was +6.5 with a standard dev. Of 7.4.”

Mean difference: **6.5**                      email  
SD(paired)    **7.4**                      email

**Bold Mean and SD values  
are used in sheet Fig. 1**

**Fig 1: Meta-analysis of the FEV1 changes caused by exercise**  
**Calculation of the P-values and the Confidence Intervals (CI) for the meta-analysis**

In small studies, the t-score of the t-distribution is used for the calculation of the P and CI, since it takes into account the study size.  
 In the small sample case, the 95% limits are  $\text{Mean} \pm t(P=0.05; df) \times SE$   
 The standard meta-analysis programs assume large sample for inverse variance pooling.  
 Therefore the SE(z) value corresponding to the large sample is calculated on the right.  
 In the "metagen" program, this SE(z) value gives a correct CI ranges in the forest plot of Fig. 1.  
 The correct SE value SE(c) does not give correct CI-limits in the standard meta-analysis programs.

| All data paired         | No of Particip | df | Effect of vitamin C on FEV1 decline by exercise (percentage points) |       | SE(c) | t    | P(2-tail) | (P=0.05;df) | 95% CI |      | SE(z) |
|-------------------------|----------------|----|---------------------------------------------------------------------|-------|-------|------|-----------|-------------|--------|------|-------|
|                         |                |    | Mean effect                                                         | SD    |       |      |           |             | Low    | High |       |
| <b>Tecklenburg 2007</b> | 8              | 7  | 6.5                                                                 | 7.4   | 2.62  | 2.48 | 0.042     | 2.36        | 0.31   | 12.7 | 3.16  |
| <b>Schachter 1982</b>   | 12             | 11 | 7.38                                                                | 11.83 | 3.41  | 2.16 | 0.053     | 2.20        | -0.13  | 14.9 | 3.83  |
| <b>Cohen 1997</b>       | 20             | 19 | 14.26                                                               | 11.13 | 2.49  | 5.73 | 0.000016  | 2.09        | 9.05   | 19.5 | 2.66  |

**Sensitiv analyses for the Cohen study:**

See the sheet Cohen 1997 for the calculation of mean and SE values using the "no effect" imputation for the 9 participants with no pul

**"No vitamin C effect" imputation for the 9 participants with missing data:**

|                   |    |    |       |       |      |      |        |      |     |      |      |
|-------------------|----|----|-------|-------|------|------|--------|------|-----|------|------|
| <b>Cohen 1997</b> | 20 | 19 | 11.20 | 13.56 | 3.03 | 3.69 | 0.0015 | 2.09 | 4.9 | 17.5 | 3.24 |
|-------------------|----|----|-------|-------|------|------|--------|------|-----|------|------|

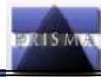

# PRISMA 2009 Checklist

1  
2  
3  
4  
5  
6  
7  
8  
9  
10  
11  
12  
13  
14  
15  
16  
17  
18  
19  
20  
21  
22  
23  
24  
25  
26  
27  
28  
29  
30  
31  
32  
33  
34  
35  
36  
37  
38  
39  
40  
41  
42  
43  
44  
45  
46  
47  
48  
49

| Section/topic                      | #  | Checklist item                                                                                                                                                                                                                                                                                              | Reported on page # |
|------------------------------------|----|-------------------------------------------------------------------------------------------------------------------------------------------------------------------------------------------------------------------------------------------------------------------------------------------------------------|--------------------|
| <b>TITLE</b>                       |    |                                                                                                                                                                                                                                                                                                             |                    |
| Title                              | 1  | Identify the report as a systematic review, meta-analysis, or both.                                                                                                                                                                                                                                         | 1                  |
| <b>ABSTRACT</b>                    |    |                                                                                                                                                                                                                                                                                                             |                    |
| Structured summary                 | 2  | Provide a structured summary including, as applicable: background; objectives; data sources; study eligibility criteria, participants, and interventions; study appraisal and synthesis methods; results; limitations; conclusions and implications of key findings; systematic review registration number. | 2                  |
| <b>INTRODUCTION</b>                |    |                                                                                                                                                                                                                                                                                                             |                    |
| Rationale                          | 3  | Describe the rationale for the review in the context of what is already known.                                                                                                                                                                                                                              | 4                  |
| Objectives                         | 4  | Provide an explicit statement of questions being addressed with reference to participants, interventions, comparisons, outcomes, and study design (PICOS).                                                                                                                                                  | 4-5                |
| <b>METHODS</b>                     |    |                                                                                                                                                                                                                                                                                                             |                    |
| Protocol and registration          | 5  | Indicate if a review protocol exists, if and where it can be accessed (e.g., Web address), and, if available, provide registration information including registration number.                                                                                                                               | no                 |
| Eligibility criteria               | 6  | Specify study characteristics (e.g., PICOS, length of follow-up) and report characteristics (e.g., years considered, language, publication status) used as criteria for eligibility, giving rationale.                                                                                                      | 6                  |
| Information sources                | 7  | Describe all information sources (e.g., databases with dates of coverage, contact with study authors to identify additional studies) in the search and date last searched.                                                                                                                                  | 7                  |
| Search                             | 8  | Present full electronic search strategy for at least one database, including any limits used, such that it could be repeated.                                                                                                                                                                               | 7                  |
| Study selection                    | 9  | State the process for selecting studies (i.e., screening, eligibility, included in systematic review, and, if applicable, included in the meta-analysis).                                                                                                                                                   | 7                  |
| Data collection process            | 10 | Describe method of data extraction from reports (e.g., piloted forms, independently, in duplicate) and any processes for obtaining and confirming data from investigators.                                                                                                                                  | 7                  |
| Data items                         | 11 | List and define all variables for which data were sought (e.g., PICOS, funding sources) and any assumptions and simplifications made.                                                                                                                                                                       | 7-8                |
| Risk of bias in individual studies | 12 | Describe methods used for assessing risk of bias of individual studies (including specification of whether this was done at the study or outcome level), and how this information is to be used in any data synthesis.                                                                                      |                    |
| Summary measures                   | 13 | State the principal summary measures (e.g., risk ratio, difference in means).                                                                                                                                                                                                                               | 6                  |
| Synthesis of results               | 14 | Describe the methods of handling data and combining results of studies, if done, including measures of consistency (e.g., $I^2$ ) for each meta-analysis.                                                                                                                                                   | 8                  |

| Section/topic | # | Checklist item | Reported on page # |
|---------------|---|----------------|--------------------|
|---------------|---|----------------|--------------------|

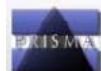

# PRISMA 2009 Checklist

1  
2  
3  
4  
5  
6  
7  
8  
9  
10  
11  
12  
13  
14  
15  
16  
17  
18  
19  
20  
21  
22  
23  
24  
25  
26  
27  
28  
29  
30  
31  
32  
33  
34  
35  
36  
37  
38  
39  
40  
41  
42  
43  
44  
45  
46  
47  
48  
49

|                               |    |                                                                                                                                                                                                          |           |
|-------------------------------|----|----------------------------------------------------------------------------------------------------------------------------------------------------------------------------------------------------------|-----------|
| Risk of bias across studies   | 15 | Specify any assessment of risk of bias that may affect the cumulative evidence (e.g., publication bias, selective reporting within studies).                                                             |           |
| Additional analyses           | 16 | Describe methods of additional analyses (e.g., sensitivity or subgroup analyses, meta-regression), if done, indicating which were pre-specified.                                                         | 7-8       |
| <b>RESULTS</b>                |    |                                                                                                                                                                                                          |           |
| Study selection               | 17 | Give numbers of studies screened, assessed for eligibility, and included in the review, with reasons for exclusions at each stage, ideally with a flow diagram.                                          | 7,9       |
| Study characteristics         | 18 | For each study, present characteristics for which data were extracted (e.g., study size, PICOS, follow-up period) and provide the citations.                                                             | 19        |
| Risk of bias within studies   | 19 | Present data on risk of bias of each study and, if available, any outcome level assessment (see item 12).                                                                                                | 9         |
| Results of individual studies | 20 | For all outcomes considered (benefits or harms), present, for each study: (a) simple summary data for each intervention group (b) effect estimates and confidence intervals, ideally with a forest plot. | 9 (fig 1) |
| Synthesis of results          | 21 | Present results of each meta-analysis done, including confidence intervals and measures of consistency.                                                                                                  | 9         |
| Risk of bias across studies   | 22 | Present results of any assessment of risk of bias across studies (see Item 15).                                                                                                                          | 9-10      |
| Additional analysis           | 23 | Give results of additional analyses, if done (e.g., sensitivity or subgroup analyses, meta-regression [see Item 16]).                                                                                    | 9-10      |
| <b>DISCUSSION</b>             |    |                                                                                                                                                                                                          |           |
| Summary of evidence           | 24 | Summarize the main findings including the strength of evidence for each main outcome; consider their relevance to key groups (e.g., healthcare providers, users, and policy makers).                     | 12        |
| Limitations                   | 25 | Discuss limitations at study and outcome level (e.g., risk of bias), and at review-level (e.g., incomplete retrieval of identified research, reporting bias).                                            | 12        |
| Conclusions                   | 26 | Provide a general interpretation of the results in the context of other evidence, and implications for future research.                                                                                  | 12-14     |
| <b>FUNDING</b>                |    |                                                                                                                                                                                                          |           |
| Funding                       | 27 | Describe sources of funding for the systematic review and other support (e.g., supply of data); role of funders for the systematic review.                                                               | 1         |

From: Moher D, Liberati A, Tetzlaff J, Altman DG, The PRISMA Group (2009). Preferred Reporting Items for Systematic Reviews and Meta-Analyses: The PRISMA Statement. PLoS Med 6(6): e1000097. doi:10.1371/journal.pmed1000097

For more information, visit: [www.prisma-statement.org](http://www.prisma-statement.org).

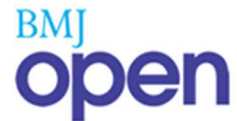

**Vitamin C may alleviate exercise-induced bronchoconstriction: a meta-analysis**

|                                 |                                                                    |
|---------------------------------|--------------------------------------------------------------------|
| Journal:                        | <i>BMJ Open</i>                                                    |
| Manuscript ID:                  | bmjopen-2012-002416.R1                                             |
| Article Type:                   | Research                                                           |
| Date Submitted by the Author:   | 07-Mar-2013                                                        |
| Complete List of Authors:       | Hemilä, Harri; University of Helsinki, Department of Public Health |
| <b>Primary Subject Heading</b>: | Respiratory medicine                                               |
| Secondary Subject Heading:      | Sports and exercise medicine, Nutrition and metabolism             |
| Keywords:                       | Asthma < THORACIC MEDICINE, NUTRITION & DIETETICS, SPORTS MEDICINE |
|                                 |                                                                    |

SCHOLARONE™  
Manuscripts

Peer review only

1  
2 Vitamin C may alleviate exercise-induced bronchoconstriction: a meta-analysis  
3  
4

5 Harri Hemilä  
6

7  
8 Department of Public Health, POB 41, University of Helsinki, Helsinki, Finland  
9

10  
11  
12  
13  
14 Harri Hemilä, MD, PhD  
15

16  
17  
18 Department of Public Health,  
19 POB 41, University of Helsinki

20 Mannerheimintie 172

21 FIN-00014 Helsinki

22 Finland

23 E-mail: harri.hemila@helsinki.fi  
24  
25  
26  
27  
28  
29

30 Words  
31

32  
33 Abstract 296  
34

35 Text 3658 (Table 1 included, Fig Legend not included)  
36  
37

38 This research received no specific grant from any funding agency in the public, commercial or not-  
39 for-profit sectors  
40

41 No conflicts of interest  
42  
43  
44

#### 45 ABBREVIATIONS 46

47 CI, confidence interval

48 EIB, exercise-induced bronchoconstriction

49 FEV<sub>1</sub>, forced expiratory volume in 1 second

50 LT, leukotriene

51 PG, prostaglandin  
52  
53  
54

55  
56 KEY WORDS: anti-asthmatic agents, asthma, exercise-induced asthma, forced expiratory flow  
57 rates, randomized controlled trial  
58

## Abstract

### Objective

To determine whether vitamin C administration influences exercise-induced bronchoconstriction (EIB).

### Design

Systematic review and meta-analysis.

### Methods

MEDLINE and Scopus were searched for placebo-controlled trials on vitamin C and EIB. The primary measures of vitamin C effect used in this study were: 1) the arithmetic difference, and 2) the relative difference, in the post-exercise FEV<sub>1</sub> decline between the vitamin C and placebo periods. The relative effect of vitamin C administration on FEV<sub>1</sub> was analyzed by using linear modelling for two studies that reported full or partial individual-level data. The arithmetic differences and the relative effects were pooled by the inverse variance method. A secondary measure of the vitamin C effect was the difference in the proportion of participants suffering from EIB on the vitamin C and placebo days.

### Results

Three placebo-controlled trials that studied the effect of vitamin C on EIB were identified. In all they had 40 participants. The pooled effect estimate indicated a reduction of 8.4 percentage points (95% CI: 4.6 to 12) in the post-exercise FEV<sub>1</sub> decline when vitamin C was administered before exercise. The pooled relative effect estimate indicated a 48% reduction (95% CI: 33 to 64%) in the post-exercise FEV<sub>1</sub> decline when vitamin C was administered before exercise. One study needed

1  
2 imputations to include it in the meta-analyses, but it also reported that vitamin C decreased the  
3  
4 proportion of participants who suffered from EIB by 50 percentage points (23 to 68); this  
5  
6 comparison did not need data imputations.  
7  
8  
9

## 10 11 **Conclusions**

12  
13 Given the safety and low cost of vitamin C, and the positive findings for vitamin C administration  
14  
15 in the three EIB studies, it seems reasonable for physically active people to test vitamin C when  
16  
17 they have respiratory symptoms such as cough associated with exercise. Further research on the  
18  
19 effects of vitamin C on EIB are warranted.  
20  
21  
22  
23  
24  
25  
26  
27  
28  
29  
30  
31  
32  
33  
34  
35  
36  
37  
38  
39  
40  
41  
42  
43  
44  
45  
46  
47  
48  
49  
50  
51  
52  
53  
54  
55  
56  
57  
58  
59  
60



## Article summary

### Article focus

- Exercise causes airway narrowing in about 10% of the general population and up to 50% of competitive athletes.
- Laboratory studies have indicated that vitamin C may have an alleviating influence on bronchoconstriction.
- The aim of this study was to examine whether vitamin C administration influences FEV<sub>1</sub> decline caused by exercise.

### Key messages

- Vitamin C may alleviate respiratory symptoms caused by exercise.
- In future studies, linear modelling should be used to examine the effect of vitamin C on post-exercise FEV<sub>1</sub> decline instead of calculating the mean effect of vitamin C on post-exercise FEV<sub>1</sub> decline.

### Strengths and limitations

- The included studies were methodologically satisfactory and their results were consistent and close.
- The included studies were small with 40 participants in all.

## Introduction

Exercise-induced bronchoconstriction (EIB) is a transient narrowing of the airways that occurs during or after exercise. Usually, a 10% or greater exercise-induced decline in FEV<sub>1</sub> is classified as EIB.[1] The prevalence of EIB varies from about 10% in the general population, to about 50% in some fields of competitive athletics.[1] The pathophysiology of EIB is not well understood. However, respiratory water loss leads to the release of inflammatory mediators, such as histamine, leukotrienes (LT), and prostaglandins (PG), all of which can cause bronchoconstriction.[1, 2] Increased levels of exhaled nitric oxide have also been associated with EIB.[3]

There is evidence that vitamin C plays a role in lung function. The production of various prostanoids in lung tissues is influenced by vitamin C, and vitamin C deficiency increases the level of bronchoconstrictor PGF<sub>2α</sub>. [4-6] An increase in airway hyperresponsiveness to histamine that was further enhanced by indomethacin administration, was observed in guinea pigs on a diet deficient in vitamin C.[6] In isolated guinea pig trachea smooth muscle, vitamin C decreased the contractions caused by PGF<sub>2α</sub>, histamine, and carbamylcholine.[4, 7, 8] Indomethacin antagonized the effect of vitamin C on chemically-induced bronchoconstriction in humans[9, 10] and the effect of vitamin C on the contractions of guinea pig tracheal muscle.[8] Thus, the effects of vitamin C might be partly mediated by alterations in PG metabolism. In humans, a two-week vitamin C (1.5 g/d) administration regime reduced the post-exercise increase in the urinary markers for the bronchoconstrictors LTC<sub>4</sub>-E<sub>4</sub> and PGD<sub>2</sub>, in addition to reducing the increase of exhaled nitric oxide.[11]

Heavy physical exertion generates oxidative stress, and therefore, as an antioxidant, the effects of vitamin C might be more manifest in people doing exercise.[12,13] The importance of vitamin C on

1  
2 the respiratory system is also indicated by the decrease in the incidence of the common cold in  
3  
4 people under heavy acute physical stress[14,15] and by its effects on the severity of the upper and  
5  
6 lower respiratory tract infections.[15-17]  
7  
8  
9

10  
11 Previously, a systematic review examined the effect of vitamin C on exercise-induced  
12  
13 bronchoconstriction.[18] However, there were substantial errors in the extraction of data and data  
14  
15 analysis in that review.[19] The purpose of this systematic review is to examine whether vitamin C  
16  
17 administration influences post-exercise FEV<sub>1</sub> decline.  
18  
19  
20  
21  
22  
23  
24  
25  
26  
27  
28  
29  
30  
31  
32  
33  
34  
35  
36  
37  
38  
39  
40  
41  
42  
43  
44  
45  
46  
47  
48  
49  
50  
51  
52  
53  
54  
55  
56  
57  
58  
59  
60

## Methods

### *Types of studies.*

Controlled trials, both randomised and non-randomised, were included in this systematic review. Only placebo-controlled blinded trials were included, as the severity of EIB might be affected by the patients' awareness of the treatment. Studies that used children and adults of either gender and any age were considered eligible.

### *Types of interventions.*

The intervention considered was oral or intravenous administration of vitamin C (ascorbic acid or its salts) of at least 0.2 g daily for a single day or for a more extended period. The dose limit was set as a pragmatic choice. When a trial with a low dose gives a negative result, the negative findings can be attributed to that low dosage. Thus, trials with large doses are more critical for testing whether vitamin C is effective at influencing EIB.

### *The outcomes and the measure of the vitamin C effect.*

The primary outcome in this meta-analysis is the relative FEV<sub>1</sub> decline caused by exercise (as a percentage). The measures selected for the vitamin C effect were: 1) the arithmetic difference in the post-exercise decline of FEV<sub>1</sub> between the placebo and vitamin C periods; this is called the percentage point difference, and 2) the relative difference in the decline of post-exercise FEV<sub>1</sub> between the vitamin C and placebo periods. A secondary outcome in this meta-analysis was the proportion of participants who suffered from EIB after the exercise test, and the measure of vitamin C effect was taken as the difference in the occurrence in EIB between the vitamin C and placebo days.

1  
2  
3  
4  
5  
6  
7  
8  
9  
10  
11  
12  
13  
14  
15  
16  
17  
18  
19  
20  
21  
22  
23  
24  
25  
26  
27  
28  
29  
30  
31  
32  
33  
34  
35  
36  
37  
38  
39  
40  
41  
42  
43  
44  
45  
46  
47  
48  
49  
50  
51  
52  
53  
54  
55  
56  
57  
58  
59  
60

*Literature searches.*

MEDLINE (OVID) was searched using MESH terms “ascorbic acid” and “exercise-induced asthma”. A similar search was carried out in Scopus. No language restrictions were used. The databases were searched from their inception to February 2013. The reference lists of identified studies and review articles were screened for additional references. See supplementary file 1 for the flow diagram of the literature search.

*Selection of studies and data extraction.*

Five controlled trials that report on vitamin C and EIB were identified. Three of them satisfied the selection criteria (Table I). One of the studies that was not included was not placebo controlled [22] and the other studied the combination of vitamins C and E.[23] The data of the three included trials were extracted and analyzed by this author. The original study authors were contacted when appropriate in order to obtain further data.

Schachter and Schlesinger (1982) reported individual-level FEV<sub>1</sub> measurements for a 12 participant cross-over study.[20] The decline in FEV<sub>1</sub> caused by exercise was calculated in this present study (see supplementary file 2).

Tecklenburg et al. (2007) reported the mean decline in post-exercise FEV<sub>1</sub> for the vitamin C and placebo phases of an 8 participant cross-over study.[11] However, these authors did not report the paired SD value for the mean difference between the two phases. Dr. Tecklenburg was subsequently contacted, and she kindly sent the paired SD value for the mean difference in decline of the post-exercise FEV<sub>1</sub> (see supplementary file 2).

1  
2 Cohen et al. (1997) reported FEV<sub>1</sub> values before and after exercise in only 11 of the 20 participants  
3  
4 of a cross-over study.[21] These 11 had been selected because of the disappearance of EIB during  
5  
6 the study. Thus, the difference in post-exercise FEV<sub>1</sub> decline between the vitamin C and placebo  
7  
8 days can be calculated for these 11 participants (the mean vitamin C effect was a reduction of 20.4  
9  
10 percentage points in the post-exercise decline in FEV<sub>1</sub>). Dr. Cohen was contacted, but he no longer  
11  
12 retained those data. Therefore, to include the Cohen et al. trial in this meta-analysis, the FEV<sub>1</sub>  
13  
14 values for the remaining 9 participants had to be imputed. A conservative "no vitamin C effect"  
15  
16 estimate was imputed for all of the 9 participants with missing data (see supplementary file 2). As a  
17  
18 sensitivity analysis, the Cohen et al. study was excluded from the meta-analysis in Fig. 1 to examine  
19  
20 whether its exclusion influenced the conclusions.  
21  
22  
23  
24  
25  
26

27 Cohen et al. also reported the number of participants who suffered from EIB after the exercise test.  
28  
29 This outcome did not require imputations and it was used as a secondary outcome for comparing the  
30  
31 vitamin C and placebo days in the Cohen study.  
32  
33  
34

### 35 *Statistical analysis.*

36  
37 The statistical heterogeneity of the three studies was assessed by using the  $\chi^2$ -test and the I<sup>2</sup>-  
38  
39 index.[24] The latter examines the percentage of total variation across studies that is due to  
40  
41 heterogeneity between studies rather than by randomness. A value of I<sup>2</sup> greater than about 70%  
42  
43 indicates a high level of heterogeneity. Since the three identified trials showed no statistical  
44  
45 heterogeneity, their results were pooled using the inverse variance method assuming fixed effect by  
46  
47 running the program "metagen" of the R package (see the supplementary file 2 for the details of the  
48  
49 calculations).[25] The program "forest.meta" of the R package was used to construct the forest  
50  
51  
52  
53  
54  
55  
56  
57  
58  
59  
60 plots.

1  
2 To examine the relative effect of vitamin C on post-exercise FEV<sub>1</sub> decline, the vitamin C effect was  
3 modelled using the placebo-day post-exercise FEV<sub>1</sub> decline as the explanatory variable, by using  
4 the linear model "lm" program of the R package.[25] To test whether the addition of the placebo-  
5 day post-exercise FEV<sub>1</sub> decline values significantly improves the linear model, the model  
6 containing the placebo-day FEV<sub>1</sub> decline values was compared with the model without them. The  
7 improvement of the model fit was calculated from the change in  $-2 \times \log(\text{likelihood})$ , which  
8 follows the  $\chi^2$  (1 df) distribution.  
9  
10  
11  
12  
13  
14  
15  
16  
17  
18  
19

20 To study the effect of vitamin C on the proportion of participants who suffered from EIB in the  
21 Cohen et al. study, the mid-P value was calculated [26] and the 95% CI was calculated by using the  
22 Agresti-Caffo method.[27]  
23  
24  
25  
26  
27  
28

29 The 2-tailed P-values are presented in this text.  
30  
31  
32  
33  
34  
35  
36  
37  
38  
39  
40  
41  
42  
43  
44  
45  
46  
47  
48  
49  
50  
51  
52  
53  
54  
55  
56  
57  
58  
59  
60

**Table I: Trials on vitamin C supplementation and exercise-induced bronchoconstriction**

| Study [ref.]                      |                   | Descriptions                                                                                                                                                                                                                                                                                                                                                                                                               |
|-----------------------------------|-------------------|----------------------------------------------------------------------------------------------------------------------------------------------------------------------------------------------------------------------------------------------------------------------------------------------------------------------------------------------------------------------------------------------------------------------------|
| Schachter & Schlesinger 1982 [20] | Methods:          | Randomized, double-blind, placebo-controlled, cross-over trial.                                                                                                                                                                                                                                                                                                                                                            |
|                                   | Participants:     | 12 asthmatic subjects, selected from among workers of Yale University in the USA: "all 12 subjects gave a characteristic description of EIB." All included participants had at least 20% reduction in MEF40% after exercise.<br>5 Males, 7 Females; mean age 26 yr (SD 5 yr).                                                                                                                                              |
|                                   | Type of exercise: | Exercise by using a cycloergometer was begun at a constant speed of 20 km/h against a zero workload. At the end of each 1 min interval, the workload was increased by 150 kilopondmeters per min, keeping the pedalling speed constant throughout the experiment. Exercise against progressively larger work loads was continued until either the heart rate reached 170 beats per min or the subject fatigued.            |
|                                   | Intervention:     | On 2 subsequent days, the subjects ingested 0.5 g of vitamin C or sucrose placebo in identical capsules 1.5 h before the exercise. Washout overnight.                                                                                                                                                                                                                                                                      |
|                                   | Outcome:          | Change in FEV <sub>1</sub> was calculated as: [pre-exercise vs. 5 min post-exercise].                                                                                                                                                                                                                                                                                                                                      |
|                                   | Notes:            | See supplementary file 2 for the calculation of the vitamin C effect from the individual-level data.                                                                                                                                                                                                                                                                                                                       |
| Cohen et al. 1997 [21]            | Methods:          | Randomized, double-blind, placebo-controlled, cross-over trial.                                                                                                                                                                                                                                                                                                                                                            |
|                                   | Participants:     | 20 asthmatic subjects in Israel. All of them had demonstrated EIB by having a "decline of at least 15%" in FEV <sub>1</sub> after a standard exercise test.<br>13 Males, 7 Females; mean age 14 yr (range 7 to 28 yr).                                                                                                                                                                                                     |
|                                   | Type of exercise: | A 7-minute exercise session using a motorized treadmill. Each subject exercised to submaximal effort at a speed and slope to provide 80% of the motional oxygen consumption as adjudged by a pulse oximeter.                                                                                                                                                                                                               |
|                                   | Intervention:     | 2 g of vitamin C or placebo 1 hour before the exercise. Washout 1 week.                                                                                                                                                                                                                                                                                                                                                    |
|                                   | Outcomes:         | Change in FEV <sub>1</sub> was calculated as: [pre-exercise vs. 8 min post-exercise].<br>Secondary outcome: proportion of participants who suffered from EIB after the exercise session (decline in FEV <sub>1</sub> at least 15%).                                                                                                                                                                                        |
|                                   | Notes:            | Individual-level data on FEV <sub>1</sub> levels was reported only for 11 of the 20 participants (Cohen's Table 2). Dr. Cohen was contacted, but he no longer had the data. Therefore, a conservative "no vitamin C effect" was imputed for the 9 participants for whom experimental data were not available; see supplementary file 2.                                                                                    |
| Tecklenburg et al. 2007 [11]      | Methods:          | Randomized, double-blind, placebo-controlled, cross-over trial.                                                                                                                                                                                                                                                                                                                                                            |
|                                   | Participants:     | 8 subjects from a population of university students and the local community, Indiana USA, with physician-diagnosed mild to moderate asthma. All subjects had documented EIB as indicated by a "drop greater than 10%" in post-exercise FEV <sub>1</sub> . They also had a history of chest tightness, shortness of breath, and intermittent wheezing following exercise.<br>2 Males, 6 Females; mean age 24.5 yr (SD 5 yr) |
|                                   | Type of exercise: | Subjects ran on a motorized treadmill, elevated by 1% per min until 85% of the age predicted max heart rate and ventilation exceeding 40–60% of predicted max voluntary ventilation. Subjects maintained this exercise intensity for 6 min. Following the 6-min steady state exercise, the grade of the treadmill continued to increase at 1% per min until volitional exhaustion.                                         |
|                                   | Intervention:     | 1.5 g vitamin C or sucrose placebo were administered as capsules matched for color and size daily for 2 weeks. Washout 1 week.<br>Subjects were advised to avoid high vitamin C foods during the study.                                                                                                                                                                                                                    |
|                                   | Outcome:          | Change in FEV <sub>1</sub> was calculated as: [pre-exercise vs. the lowest value within 30 min post-exercise].                                                                                                                                                                                                                                                                                                             |
|                                   | Notes:            | Dr. S. Tecklenburg kindly made the mean and SD for the paired FEV <sub>1</sub> decline available. For the decline in FEV <sub>1</sub> level, the mean difference was +6.5                                                                                                                                                                                                                                                  |



| Study [ref.] |  | Descriptions                                              |
|--------------|--|-----------------------------------------------------------|
|              |  | percentage points (paired SD 7.4) in favour of vitamin C. |

For peer review only

## Results

Three randomized, placebo-controlled, double-blind, cross-over trials that had examined the effect of vitamin C supplementation on the decline in FEV<sub>1</sub> caused by exercise were retrieved. The experimental conditions were similar (Table 1). The three trials had a total of 40 participants. There was no statistical heterogeneity found between the three studies for the percentage points scale:  $I^2 = 0\%$ ;  $\chi^2(2 \text{ df}) = 1.1$ ,  $P = 0.5$ . Therefore, the pooled percentage point estimate of the vitamin C effect was calculated (Fig. 1). Compared with the placebo phases, the mean reduction in post-exercise FEV<sub>1</sub> decline was 8.4 percentage points during the vitamin C phases (95% CI: 4.6 to 12.2;  $P < 0.0001$ ).

In the Schachter and Schlesinger study, the post-exercise FEV<sub>1</sub> decline was 17.6% for placebo, but only 10.2% for vitamin C (0.5 g single dose), with a 7.4 percentage point (95% CI: -0.1 to 15;  $P = 0.054$ ) improvement for the vitamin C treatment.[20] In the Tecklenburg et al. study, the post-exercise FEV<sub>1</sub> decline was 12.9% when on placebo, but only 6.4% when on vitamin C (1.5 g/d for 2 weeks), indicating an improvement of 6.5 percentage points (95% CI: 0.3 to 13;  $P = 0.042$ ) for vitamin C.[11] With the conservative imputation of “no vitamin C effect” for 9 participants in the Cohen et al. study, there was a reduction in post-exercise FEV<sub>1</sub> decline by 11.2 percentage points (95% CI: 4.8 to 18;  $P = 0.002$ ) on the vitamin C day (2 g single dose).[21]

EIB is not a dichotomous condition, instead there is a continuous variation in the possible level of FEV<sub>1</sub> decline caused by exercise. A single constant percentage point estimate of vitamin C effect for all people who suffer from EIB may thus be simplistic. Instead, it is possible that a relative scale would better capture the effect of vitamin C. Schachter and Schlesinger published individual-level data for all their 12 participants,[20] and thus their data were analyzed using linear modelling to

1  
2  
3  
4  
5  
6  
7  
8  
9  
10  
11  
12  
13  
14  
15  
16  
17  
18  
19  
20  
21  
22  
23  
24  
25  
26  
27  
28  
29  
30  
31  
32  
33  
34  
35  
36  
37  
38  
39  
40  
41  
42  
43  
44  
45  
46  
47  
48  
49  
50  
51  
52  
53  
54  
55  
56  
57  
58  
59  
60

examine whether the vitamin C effect might depend on the placebo-day post-exercise FEV<sub>1</sub> decline, i.e. on the baseline severity of EIB (Fig. 2). Adding the placebo-day post-exercise FEV<sub>1</sub> decline values to the linear model improved the statistical model by  $\chi^2$  (1 df) = 16.5, corresponding to P = 0.00005. This indicates that the linear model that includes the placebo-day post-exercise FEV<sub>1</sub> decline explains the effect of vitamin C much better than the constant 7.4 percentage point effect for all of their participants suffering from EIB. The slope of the linear model indicates a 55% reduction in the decline of the post-exercise FEV<sub>1</sub> (95% CI: 32% to 78%; P = 0.0003) for vitamin C administration compared with placebo. Thus, in the percentage points scale, though there was a trend towards a mean vitamin C effect, the difference between vitamin C and placebo in the Schachter and Schlesinger trial was not significant (P = 0.054), whereas in the linear model, the slope indicates a highly significant difference between vitamin C and placebo (P = 0.0003).

Cohen et al. published individual level data for only 11 of their 20 participants (filled squares in Fig. 3).[21] A conservative “no vitamin C effect” was imputed for the remaining 9 participants (open squares in Fig. 3). Only those participants who had a decline in post-exercise FEV<sub>1</sub> of at least 15% were included in the Cohen study and therefore the horizontal variation in the Cohen data was narrow. Fitting the linear regression line through the origin indicates a 42% reduction in post-exercise FEV<sub>1</sub> decline (95% CI: 19 to 64%) with vitamin C administration.

Tecklenburg et al. did not report individual level data for their 8 participants and the data were not available.[11] The mean values indicate 50.4% (95% CI: 2.4% to 98%) reduction in post-exercise FEV<sub>1</sub> decline for the vitamin C period.

There was no statistical heterogeneity found between the three studies on the relative effect scale:  $I^2$  = 0%;  $\chi^2$ (2 df) = 0.7, P = 0.7. Therefore, the pooled estimate of the relative vitamin C effect was

1  
2 calculated for the three trials (Fig. 4). Compared with the placebo phases, vitamin C administration  
3  
4 reduced the post-exercise FEV<sub>1</sub> decline by 48% (95% CI: 33 to 64%; P < 0.0001).  
5  
6  
7  
8  
9

10  
11  
12  
13 As a sensitivity test, the Cohen et al. study was excluded from the meta-analysis in Fig. 1. On the  
14  
15 basis of the two remaining trials, the estimate of vitamin C effect on post-exercise FEV<sub>1</sub> decline  
16  
17 became 6.8 percentage points (95% CI: 2.0 to 11.6; P = 0.005). Thus, the Cohen et al. study  
18  
19 imputations are not crucial for the conclusion that vitamin C influences post-exercise FEV<sub>1</sub> decline.  
20  
21  
22  
23

24 Finally, although Cohen et al. did not report individual-level data for post-exercise FEV<sub>1</sub> decline  
25  
26 values for 9 of their participants, they reported the presence or absence of EIB (at least 15% decline  
27  
28 in post-exercise FEV<sub>1</sub>) on the vitamin C and placebo days and this dichotomized FEV<sub>1</sub> outcome  
29  
30 does not suffer from missing data. On the placebo day, 100% (20/20) of participants suffered from  
31  
32 EIB, whereas on the vitamin C day, only 50% (10/20) suffered from EIB. This outcome gives 50  
33  
34 percentage point decrease (95% CI: 23 to 68; P = 0.0002) in the occurrence of EIB following  
35  
36 vitamin C administration.  
37  
38  
39  
40  
41  
42  
43  
44  
45  
46  
47  
48  
49  
50  
51  
52  
53  
54  
55  
56  
57  
58  
59  
60

## Discussion

In this meta-analysis of three randomized placebo-controlled double-blind trials, vitamin C was found to reduce the post-exercise decline in FEV<sub>1</sub> by a mean of 8.4 percentage points (Fig. 1). Nevertheless, there is a great variation in the level of FEV<sub>1</sub> decline caused by exercise. Therefore it may not be reasonable to assume that a single and constant percentage point estimate of the vitamin C effect is valid for all persons suffering from EIB. Linear modelling of the Schachter and Schlesinger data [20] indicated that it is much better to study the response to vitamin C administration as a relative effect (Fig. 2). However, full individual level data were not available for the other two trials. Nonetheless, all three studies are consistent with vitamin C administration halving the post-exercise decline in FEV<sub>1</sub> (Fig. 4).

The Cohen et al. study [21] required imputations for 9 participants, however, excluding the Cohen et al. study from the percentage point meta-analysis did not influence conclusions. Furthermore, Cohen et al. reported that the number of participants who suffered from EIB dropped from 100% on the placebo day to 50% on the vitamin C day and this outcome did not require imputations, yet the highly significant benefit of vitamin C was seen also in this outcome.

The three studies included in this systematic review indicate that 0.5 to 2 g of vitamin C administration before exercise may have a beneficial effect on many people suffering from EIB. All of the three trials were double-blind placebo-controlled randomized trials so the risk of bias between the trial periods is low. The total number of participants in the three trials is only 40. However, a low number of participants is a concern primarily when the results are negative, but less so when the results are statistically highly significant.

1  
2 The three trials were carried out in three different decades and on two different continents. The  
3  
4 criteria for EIB differed and the mean age of participants was 14 yr in the Cohen study but 25 and  
5  
6 26 years in the two other studies. Still, all the studies found a 50% reduction in the post-exercise  
7  
8 FEV<sub>1</sub> decline. It is not evident how far this 50% estimate can be generalized, but the close estimate  
9  
10 in such different studies suggests that the estimate may be valid also for several other people who  
11  
12 suffer from EIB.  
13  
14

15  
16  
17  
18 As to the effect of vitamin C on physically stressed people, a few studies on the common cold have  
19  
20 some relevance to the EIB trials. Although vitamin C supplementation had no preventive effect  
21  
22 against colds in the general community, administration of vitamin C halved the incidence of colds in  
23  
24 five randomized placebo-controlled trials that studied subjects under heavy acute physical  
25  
26 stress.[14,15] Three of the studies were on marathon runners,[28-30] one study used Canadian  
27  
28 soldiers in a northern training exercise,[31] and one study was on schoolchildren in a skiing camp in  
29  
30 the Swiss Alps.[32] In the general population, acute cough and sore throat usually indicates a viral  
31  
32 etiology. However, such symptoms occurring after a marathon run need not be caused by a viral  
33  
34 infection, instead they can result from injury to runners' airways caused by hours of exceptional  
35  
36 ventilatory exertion.[2] Thus, the three common cold studies of marathon runners may have been  
37  
38 partly measuring the effect of vitamin C on the injury to their airways instead of the effect on viral  
39  
40 infections.[33]  
41  
42  
43  
44  
45  
46  
47  
48  
49  
50

51 A recent study in Israel found that vitamin C halved the duration of common cold type symptoms in  
52  
53 male adolescent competitive swimmers, but no benefit was found in females.[34] Here too, the  
54  
55 etiology is unclear and the respiratory symptoms might well have been caused, or partly caused, by  
56  
57  
58  
59  
60

1  
2 non-infectious irritation of swimmers' airways.  
3  
4

5  
6  
7 In evidence-based medicine the primary question is whether an intervention has effects on clinically  
8 relevant outcomes, on symptoms and signs such as coughs. With such a perspective, the etiology of  
9 respiratory symptoms is not of prime importance. Thus, in addition to the three EIB trials analyzed  
10 in this systematic review, six common cold studies have reported the benefits of vitamin C  
11 administration for respiratory symptoms of people under heavy physical stress. Given the low cost  
12 and safety of vitamin C,[15,35] and the consistency of positive findings in the three studies on EIB  
13 and the six studies on the common cold, it seems reasonable for physically fit and active people to  
14 test vitamin C on an individual basis if they have respiratory symptoms such as cough associated  
15 with exercise.  
16  
17  
18  
19  
20  
21  
22  
23  
24  
25  
26  
27

28  
29 Promising results in the EIB and common cold studies indicate that further research on vitamin C  
30 and respiratory symptoms of physically active people are warranted. In future trials, statistical  
31 modelling should be used to examine the effect of vitamin C on FEV<sub>1</sub> levels, instead of simply  
32 calculating the percentage point estimates. Although the primary question in the evidence-based  
33 medicine framework is to assess the effectiveness of vitamin C on clinically relevant outcomes, the  
34 etiology of the respiratory symptoms should also be investigated in future investigations.  
35  
36  
37  
38  
39  
40  
41  
42  
43  
44  
45  
46  
47  
48

#### 49 **Acknowledgements**

50  
51  
52

53 The author thanks Dr. Tecklenburg who kindly supplied supplementary data for this analysis. The  
54 author also thanks Elizabeth Stovold for her contributions to an early version of this manuscript, by  
55  
56  
57  
58  
59  
60

1  
2  
3  
4  
5  
6  
7  
8  
9  
10  
11  
12  
13  
14  
15  
16  
17  
18  
19  
20  
21  
22  
23  
24  
25  
26  
27  
28  
29  
30  
31  
32  
33  
34  
35  
36  
37  
38  
39  
40  
41  
42  
43  
44  
45  
46  
47  
48  
49  
50  
51  
52  
53  
54  
55  
56  
57  
58  
59  
60

helping in the literature searches, considering studies for inclusion, and extracting data for the meta-analysis.

For peer review only



## Legends to Figures

Fig. 1. Percentage point effect of vitamin C on the decline in FEV<sub>1</sub> caused by exercise. The vertical lines indicate the 95% CI for the three trials and the box in the middle of the lines indicates the mean effect of the study. The diamond shape at the bottom indicates the 95% CI for the pooled effect. TE, treatment effect; seTE, standard error of the TE; W, weight of the study.

Fig. 2. The effect of vitamin C on post-exercise FEV<sub>1</sub> decline as a function of the placebo-day post-exercise FEV<sub>1</sub> decline for the Schachter and Schlesinger study.[20] The squares show the 12 participants of the study. The vertical axis shows the difference in post-exercise FEV<sub>1</sub> decline between the vitamin C and the placebo days. The horizontal axis shows the post-exercise FEV<sub>1</sub> decline on the placebo day. The black line indicates the fitted linear regression line. The horizontal dash (-) line indicates the level of identity between vitamin C and placebo. See the supplementary file 2 for the calculations.

Fig. 3. The effect of vitamin C on post-exercise FEV<sub>1</sub> decline as a function of the placebo-day post-exercise FEV<sub>1</sub> decline for the Cohen et al. study.[21] The filled squares show the 11 participants for whom data were reported and the empty squares show the 9 participants to whom the conservative “no vitamin C effect” data were imputed. The vertical axis shows the difference in post-exercise FEV<sub>1</sub> decline between the vitamin C and the placebo days. The horizontal axis shows the post-exercise FEV<sub>1</sub> decline on the placebo day. The black line indicates the fitted linear regression line. The horizontal dash (-) line indicates the level of identity between vitamin C and placebo. The linear regression line was fitted through the origin, since the variation in the placebo-day FEV<sub>1</sub>

1  
2 decline values is narrow. See the supplementary file 2 for the calculations.  
3  
4  
5

6  
7 Fig. 4. Relative effect of vitamin C on the decline in FEV<sub>1</sub> caused by exercise. The vertical lines  
8 indicate the 95% CI for the three trials and the box in the middle of the lines indicates the mean  
9 effect of the study. The diamond shape at the bottom indicates the 95% CI for the pooled effect. The  
10 estimates for the Schachter 1982 and Cohen 1997 studies are based on the slopes of the linear  
11 models in Figs. 3 and 4. The estimates for the Tecklenburg 2007 study are the study mean estimates.  
12  
13  
14  
15  
16  
17  
18 TE, treatment effect; seTE, standard error of the TE; W, weight of the study.  
19  
20  
21  
22  
23  
24  
25  
26  
27  
28  
29  
30  
31  
32  
33  
34  
35  
36  
37  
38  
39  
40  
41  
42  
43  
44  
45  
46  
47  
48  
49  
50  
51  
52  
53  
54  
55  
56  
57  
58  
59  
60

## References

- 1 Weiler JM, Anderson SD, Randolph C. Pathogenesis, prevalence, diagnosis, and management of exercise-induced bronchoconstriction. *Ann Allergy Asthma Immunol* 2010;105(6 Suppl):S1-47. doi:10.1016/j.anai.2010.09.021
- 2 Anderson SD, Kippelen P. Airway injury as a mechanism for exercise-induced bronchoconstriction in elite athletes. *J Allergy Clin Immunol* 2008;122:225-235. doi:10.1016/j.jaci.2008.05.001
- 3 Buchvald F, Hermansen MN, Nielsen KG, et al. Exhaled nitric oxide predicts exercise-induced bronchoconstriction in asthmatic school children. *Chest* 2005;128:1964-1967. doi:10.1378/chest.128.4.1964
- 4 Puglisi L, Berti F, Bosisio E, et al. Ascorbic acid and PGF $2\alpha$  antagonism on tracheal smooth muscle. *Adv Prostaglandin Tromboxane Res* 1976;1:503-506.
- 5 Rothberg KG, Hitchcock M. Effects of ascorbic acid deficiency on the in vitro biosynthesis of cyclooxygenase metabolites in guinea pig lungs. *Prostaglandins Leukot Med* 1983;12:137-147. doi:10.1016/0262-1746(83)90077-X
- 6 Mohsenin V, Tremml PG, Rothberg KG, et al. Airway responsiveness and prostaglandin generation in scorbutic guinea pigs. *Prostaglandins, Leukot Essent Fatty Acids* 1988;33:149-155.
- 7 Zuskin E, Lewis AJ, Bouhuys A. Inhibition of histamine-induced airway constriction by ascorbic acid. *J Allergy Clin Immunol* 1973;51:218-226. doi:10.1016/0091-6749(73)90141-3
- 8 Sipahi E, Ercan ZS. The mechanism of the relaxing effect of ascorbic acid in guinea pig isolated tracheal muscle. *Gen Pharmacol* 1997;28:757-760. doi:10.1016/S0306-3623(96)00277-7
- 9 Ogilvy CS, DuBois AB, Douglas JS. Effects of ascorbic acid and indomethacin on the

- 1  
2  
3  
4  
5  
6  
7  
8  
9  
10  
11  
12  
13  
14  
15  
16  
17  
18  
19  
20  
21  
22  
23  
24  
25  
26  
27  
28  
29  
30  
31  
32  
33  
34  
35  
36  
37  
38  
39  
40  
41  
42  
43  
44  
45  
46  
47  
48  
49  
50  
51  
52  
53  
54  
55  
56  
57  
58  
59  
60
- airways of healthy male subjects with and without induced bronchoconstriction. *J Allergy Clin Immunol* 1981;67:363-369. doi:10.1016/0091-6749(81)90081-6
- 10 Mohsenin V, Dubois AB, Douglas JS. Effect of ascorbic acid on response to methacholine challenge in asthmatic subjects. *Am Rev Respir Dis* 1983;127:143-147.
- 11 Tecklenburg SL, Mickleborough TD, Fly AD, et al. Ascorbic acid supplementation attenuates exercise-induced bronchoconstriction in patients with asthma. *Respir Med* 2007;101:1770-1778. doi:10.1016/j.rmed.2007.02.014
- 12 Powers SK, Jackson MJ. Exercise-induced oxidative stress: cellular mechanisms and impact on muscle force production. *Physiol Rev.* 2008;88:1243-76. doi:10.1152/physrev.00031.2007
- 13 Ashton T, Young IS, Peters JR, et. al. Electron spin resonance spectroscopy, exercise, and oxidative stress: an ascorbic acid intervention study. *J Appl Physiol* 1999;87:2032-6.  
<http://www.ncbi.nlm.nih.gov/pubmed/10601146>
- 14 Hemilä H. Vitamin C and common cold incidence: a review of studies with subjects under heavy physical stress. *Int J Sports Med* 1996;17:379-383. doi:10.1055/s-2007-972864  
Available at: <http://hdl.handle.net/10250/7983> (accessed 2 Mar 2013)
- 15 Hemilä H, Chalker E. Vitamin C for preventing and treating the common cold. *Cochrane Database Syst Rev* 2013;(1):CD000980. doi:10.1002/14651858.CD000980.pub4
- 16 Hemilä H. Vitamin C supplementation and common cold symptoms: problems with inaccurate reviews. *Nutrition* 1996;12:804-809. doi:10.1016/S0899-9007(96)00223-7  
Available at: <http://hdl.handle.net/10250/7979> (accessed 2 Mar 2013)
- 17 Hemilä H, Louhiala P. Vitamin C may affect lung infections. *J R Soc Med* 2007;100:495-498. doi:10.1258/jrsm.100.11.495
- 18 Kaur B, Rowe BH, Stovold E. Vitamin C supplementation for asthma. *Cochrane Database Syst Rev* 2009;(1):CD000993. doi:10.1002/14651858.CD000993.pub3
- 19 Hemilä H. Feedback. In: Kaur B, Rowe BH, Stovold E. Vitamin C supplementation for

- 1  
2 asthma. Cochrane Database Syst Rev 2009;(1):CD000993.  
3  
4 doi:10.1002/14651858.CD000993.pub3  
5  
6 Available at: <http://hdl.handle.net/10138/38500> (accessed 7 Mar 2013)  
7  
8  
9 20 Schachter EN, Schlesinger A. The attenuation of exercise-induced bronchospasm by ascorbic  
10 acid. *Ann Allergy* 1982;49:146-151.  
11  
12 <http://www.ncbi.nlm.nih.gov/pubmed/7114587>  
13  
14  
15 21 Cohen HA, Neuman I, Nahum H. Blocking effect of vitamin C in exercise-induced asthma.  
16 *Arch Pediatr Adolescent Med* 1997;151:367-370.  
17  
18 doi:10.1001/archpedi.1997.02170410041005  
19  
20  
21  
22 22 Miric M, Haxhiu MA. Effect of vitamin C on exercise-induced bronchoconstriction [Serbo-  
23 Croatian]. *Plucne Bolesti* 1991;43:94-97.  
24  
25 <http://www.ncbi.nlm.nih.gov/pubmed/1766998>  
26  
27  
28 23 Murphy JD, Ferguson CS, Brown KR, et al. The effect of dietary antioxidants on lung  
29 function in exercise induced asthma [abstract]. *Med Sci Sports Exerc* 2002;34(5 Suppl):S155.  
30  
31  
32  
33 24 Higgins JPT, Thompson SG, Deeks JJ, et al. Measuring inconsistency in meta-analysis. *BMJ*  
34 2003;327:557-560. doi:10.1136/bmj.327.7414.557  
35  
36  
37 25 The R Project for Statistical Computing. <http://www.r-project.org/> (accessed 7 Mar 2013)  
38  
39  
40 26 Lydersen S, Fagerland MW, Laake P. Recommended tests for association in 2 x 2 tables. *Stat*  
41 *Med* 2009;28:1159-75. doi:10.1002/sim.3531  
42  
43 <http://www.ncbi.nlm.nih.gov/pubmed/19170020>  
44  
45  
46 27 Fagerland MW, Lydersen S, Laake P. Recommended confidence intervals for two independent  
47 binomial proportions. *Stat Methods Med Res* 2011 (in press).  
48  
49 doi:10.1177/0962280211415469  
50  
51  
52 28 Peters EM, Goetzsche JM, Grobbelaar B, et al. Vitamin C supplementation reduces the  
53 incidence of posttrace symptoms of upper-respiratory-tract infection in ultramarathon runners.  
54  
55 *Am J Clin Nutr* 1993;57:170-174.  
56  
57  
58  
59  
60

- 1  
2  
3  
4  
5  
6  
7  
8  
9  
10  
11  
12  
13  
14  
15  
16  
17  
18  
19  
20  
21  
22  
23  
24  
25  
26  
27  
28  
29  
30  
31  
32  
33  
34  
35  
36  
37  
38  
39  
40  
41  
42  
43  
44  
45  
46  
47  
48  
49  
50  
51  
52  
53  
54  
55  
56  
57  
58  
59  
60
- 29 Peters EM, Goetzsche JM, Joseph LE, et al. Vitamin C as effective as combinations of anti-oxidant nutrients in reducing symptoms of upper respiratory tract infection in ultramarathon runners. *S Afr J Sports Med* 1996;11:23-27.
- 30 Moolla ME. The effect of supplemental anti-oxidants on the incidence and severity of upper respiratory tract infections in ultra-marathon runners [MSc Thesis]. South Africa: University of Cape Town; 1996.
- 31 Sabiston BH, Radomski MW. Health Problems and Vitamin C in Canadian Northern Military Operations. DCIEM Report no. 74-R-1012. Downsview, Ontario, Canada: Defence and Civil Institute of Environmental Medicine; 1974, 10 pp. Available at:  
[http://www.mv.helsinki.fi/home/hemila/CC/Sabiston\\_1974\\_ch.pdf](http://www.mv.helsinki.fi/home/hemila/CC/Sabiston_1974_ch.pdf) (accessed 7 Mar 2013)
- 32 Ritzel G. Critical analysis of the role of vitamin C in the treatment of the common cold [in German]. *Helv Med Acta* 1961;28:63-68. Translation at:  
<http://www.mv.helsinki.fi/home/hemila/T3.pdf> (accessed 7 Mar 2013)
- 33 Hemilä H. Vitamin C and exercise-induced bronchoconstriction in athletes. *J Allergy Clin Immunol* 2009;123:274-275. doi:10.1016/j.jaci.2008.10.004
- 34 Constantini NW, Dubnov-Raz G, Eyal BB, et al. The effect of vitamin C on upper respiratory infections in adolescent swimmers: a randomized trial. *Eur J Pediatr* 2011;170:59-63.  
doi:10.1007/s00431-010-1270-z
- 35 Hathcock JN, Azzi A, Blumberg J, et al. Vitamins E and C are safe across a broad range of intakes. *Am J Clin Nutr* 2005;81:736-745.

1  
2  
3  
4  
5  
6  
7 Vitamin C may alleviate exercise-induced bronchoconstriction: a meta-analysis

8  
9 Harri Hemilä

10  
11 Department of Public Health, POB 41, University of Helsinki, Helsinki, Finland

12  
13  
14  
15  
16  
17 Harri Hemilä, MD, PhD

18  
19  
20 Department of Public Health,  
21 POB 41, University of Helsinki  
22 Mannerheimintie 172  
23 FIN-00014 Helsinki  
24 Finland  
25 E-mail: harri.hemila@helsinki.fi  
26  
27  
28  
29

30 Words

31  
32  
33 Abstract 296

34  
35 Text 3658 (Table 1 included, Fig Legend not included)

36  
37 This research received no specific grant from any funding agency in the public, commercial or not-  
38 for-profit sectors

39  
40 No conflicts of interest  
41  
42

#### 43 ABBREVIATIONS

44  
45 CI, confidence interval  
46 EIB, exercise-induced bronchoconstriction  
47 FEV<sub>1</sub>, forced expiratory volume in 1 second  
48 LT, leukotriene  
49 PG, prostaglandin  
50

51  
52 KEY WORDS: anti-asthmatic agents, asthma, exercise-induced asthma, forced expiratory flow  
53 rates, randomized controlled trial  
54

**Abstract****Objective**

To determine whether vitamin C administration influences exercise-induced bronchoconstriction (EIB).

**Design**

Systematic review and meta-analysis.

**Methods**

MEDLINE and Scopus were searched for placebo-controlled trials on vitamin C and EIB. The primary measures of vitamin C effect used in this study were: 1) the arithmetic difference, and 2) the relative difference, in the post-exercise FEV<sub>1</sub> decline between the vitamin C and placebo periods. The relative effect of vitamin C administration on FEV<sub>1</sub> was analyzed by using linear modelling for two studies that reported full or partial individual-level data. The arithmetic differences and the relative effects were pooled by the inverse variance method. A secondary measure of the vitamin C effect was the difference in the proportion of participants suffering from EIB on the vitamin C and placebo days.

**Results**

Three placebo-controlled trials that studied the effect of vitamin C on EIB were identified. In all they had 40 participants. The pooled effect estimate indicated a reduction of 8.4 percentage points (95% CI: 4.6 to 12) in the post-exercise FEV<sub>1</sub> decline when vitamin C was administered before exercise. The pooled relative effect estimate indicated a 48% reduction (95% CI: 33 to 64%) in the post-exercise FEV<sub>1</sub> decline when vitamin C was administered before exercise. One study needed



1  
2  
3  
4  
5  
6 imputations to include it in the meta-analyses, but it also reported that vitamin C decreased the  
7 proportion of participants who suffered from EIB by 50 percentage points (23 to 68); this  
8 comparison did not need data imputations.  
9  
10  
11

### 12 13 **Conclusions**

14  
15 Given the safety and low cost of vitamin C, and the positive findings for vitamin C administration  
16 in the three EIB studies, it seems reasonable for physically active people to test vitamin C when  
17 they have respiratory symptoms such as cough associated with exercise. Further research on the  
18 effects of vitamin C on EIB are warranted.  
19  
20  
21  
22  
23  
24  
25  
26  
27  
28  
29  
30  
31  
32  
33  
34  
35  
36  
37  
38  
39  
40  
41  
42  
43  
44  
45  
46  
47  
48  
49  
50  
51  
52  
53  
54

## Article summary

## Article focus

- Exercise causes airway narrowing in about 10% of the general population and up to 50% of competitive athletes.
- Laboratory studies have indicated that vitamin C may have an alleviating influence on bronchoconstriction.
- The aim of this study was to examine whether vitamin C administration influences FEV<sub>1</sub> decline caused by exercise.

## Key messages

- Vitamin C may alleviate respiratory symptoms caused by exercise. Physically active people may test vitamin C on an individual basis if they have respiratory symptoms such as cough associated with exercise.
- In future studies, linear modelling should be used to examine the effect of vitamin C on post-exercise FEV<sub>1</sub> decline instead of simply calculating the mean effect of vitamin C on post-exercise FEV<sub>1</sub> decline.

Formatted

## Strengths and limitations

- The included studies were methodologically satisfactory and their results were consistently consistent and close.
- The included studies were small with 40 participants in all.

## Introduction

Exercise-induced bronchoconstriction (EIB) ~~is means~~ a transient narrowing of the airways ~~narrowing after or that occurs~~ during or after exercise. Usually, a 10% or greater ~~an~~ exercise-induced decline in FEV<sub>1</sub> ~~decline of 10% or greater~~, is classified as EIB.[1] The prevalence of EIB varies from about 10% in the general population, to about 50% in some fields of competitive athletics.[1] The pathophysiology of EIB is not well understood. However, but respiratory water loss injury to the airways seems to leads to the release of inflammatory mediators, such as histamine, leukotrienes (LT), and prostaglandins (PG), all of which can cause bronchoconstriction.[1, 2] Increased levels of exhaled nitric oxide have also been associated edion with EIB.[3]

There is evidence indicating that vitamin C plays has a role in the lungs function. The production of various prostanoids in lung tissues is influenced by vitamin C, and vitamin C deficiency increases the level of bronchoconstrictor PGF<sub>2α</sub>. [4-6] An increase in airway hyperresponsiveness to histamine that, which was further enhanced by indomethacin administration, was observed in guinea pigs on a diet deficient in vitamin C. [6] In isolated guinea pig trachea smooth muscle, vitamin C decreased the contractions caused by PGF<sub>2α</sub>, histamine, PGF<sub>2α</sub> and carbamylcholine. [4, 7, 8] Since ~~Indomethacin~~ antagonized the effect of vitamin C on chemically-induced bronchoconstriction in humans [9, 10] and the effect of vitamin C on the contractions of guinea pig tracheal muscle. [8] Thus, the effects of vitamin C might be at least partly, mediated by alterations in PG metabolism. In humans, a two2-week vitamin C (1.5 g/d) administration regime reduced decreased the post-exercise increase in the urinary markers for the bronchoconstrictors LTC<sub>4</sub>-E<sub>4</sub> and PGD<sub>2</sub>, in addition to reducing the increase of the decrease in post-exercise increase in exhaled nitric oxide. [11]

Heavy physical exertion generates oxidative stress, and therefore, as an antioxidant, the effects of

1  
2  
3  
4  
5  
6  
7 vitamin C might be more manifest in people doing exercise.[12,13] The importance of vitamin C  
8 on the respiratory system is also indicated by the decrease in the incidence of the common cold in  
9 people under heavy acute physical stress[14,15] and by its effects on the severity of the upper and  
10 lower respiratory tract infections.[1542-1764]-and by the decrease in the incidence of the common  
11 cold incidence in people under heavy acute physical stress.[164,175]  
12  
13  
14  
15  
16

17  
18 Previously, a systematic review examined the effect of vitamin C on exercise-induced  
19 bronchoconstriction.[186] However, the review has severe there were substantial errors in the  
20 extraction of data and data analysis in that review.[197] The purpose of this systematic review is to  
21 examine whether vitamin C administrationsupplementation influences post-exercise FEV<sub>1</sub>  
22 declineEIB.  
23  
24  
25  
26  
27  
28  
29  
30  
31  
32  
33  
34  
35  
36  
37  
38  
39  
40  
41  
42  
43  
44  
45  
46  
47  
48  
49  
50  
51  
52  
53  
54  
55  
56  
57  
58  
59  
60

## Methods

### *Types of studies.*

Controlled trials, both randomised and non-randomised, were included in this systematic review.

Only placebo-controlled blinded trials were included, ~~as since~~ the ~~severity level~~ of EIB might be affected by the patients' awareness of the treatment. ~~Studies that used~~ ~~Trials of~~ children and adults of either gender and any age were considered eligible.

### *Types of interventions.*

The intervention considered was oral or intravenous administration of vitamin C (ascorbic acid or its salts) of at least 0.2 g daily for a single day or for a ~~more extended~~ period. The dose limit was set as a pragmatic choice. ~~When~~ ~~if~~ a trial with a low dose ~~gives~~ ~~finds~~ a negative result, the negative findings can be attributed to ~~that~~ ~~the~~ low ~~dosage~~ ~~dose~~. Thus, trials with large doses are more critical for testing whether vitamin C is effective ~~at influencing EIB~~.

### *The outcomes and the measure of ~~the~~ vitamin C effect.*

The ~~primary~~ outcome in this meta-analysis is the relative FEV<sub>1</sub> decline caused by exercise (~~as a~~ ~~+~~ ~~percentage~~). The measures ~~selected for the~~ ~~of~~ vitamin C effect ~~were~~ ~~are~~: 1) the arithmetic difference in the post-exercise ~~decline of~~ FEV<sub>1</sub> ~~decline~~ between the placebo and vitamin C periods; this is called the percentage point difference, and 2) the relative difference in the ~~decline of~~ post-exercise FEV<sub>1</sub> ~~decline~~ between the vitamin C and placebo periods. ~~A secondary outcome in this meta-analysis was~~ ~~the proportion of participants who suffered from EIB after the exercise test, and the measure of~~ ~~vitamin C effect was taken as the difference in the occurrence in EIB between the vitamin C and~~ ~~placebo days~~.

1  
2  
3  
4  
5  
6  
7 *Literature searches.*

8 MEDLINE (OVID) was searched using MESH terms “ascorbic acid” and “exercise-induced  
9 asthma”. A similar search was carried out in Scopus. No language restrictions were used. The  
10 databases were searched from their inception to ~~February 2013~~November 2012. The reference lists  
11 of identified ~~studies~~trials and review articles were screened for additional references. See  
12 supplementary file 1 for the flow diagram of the literature search.  
13  
14  
15  
16  
17  
18  
19  
20

21 *Selection of studies and data extraction.*

22 Five controlled trials that reporting on vitamin C and EIB were identified. Three of them satisfied  
23 the selection criteria (Table I). ~~whereas one of the studies that was not included~~ was not placebo  
24 controlled [229] and ~~the other one~~ studied the combination of vitamins C and E.[23+] The data of  
25 the three included trials were extracted and analyzed by this author. ~~The original study a~~Authors  
26 were contacted when appropriate in order to obtain further data.  
27  
28  
29  
30  
31  
32  
33  
34

35 Schachter and Schlesinger (1982) reported individual-level FEV<sub>1</sub> measurements for a 12  
36 participant cross-over study.~~[20], in which t~~ The decline in FEV<sub>1</sub> ~~decline~~ caused by exercise was  
37 calculated in this present study (see ~~s~~Supplementary file 2).~~[18]~~  
38  
39  
40  
41

42 Tecklenburg et al. (2007) reported the mean decline in post-exercise FEV<sub>1</sub> ~~decline~~ for the vitamin C  
43 and placebo phases of an 8 participant cross-over study.~~[11]~~ However, ~~these authors but~~ did not  
44 report the paired SD value for the mean difference between the two phases.~~[11]~~ Dr. Tecklenburg  
45 was subsequently contacted, and she kindly sent the paired SD value for the mean difference in  
46 decline of the post-exercise FEV<sub>1</sub> (see supplementary file 2).  
47  
48  
49  
50  
51

Formatted

1  
2  
3  
4  
5  
6  
7 Cohen et al. (1997) reported FEV<sub>1</sub> values before and after exercise in only 11 of the 20 participants  
8 of a cross-over study.<sup>[21]</sup> These 11 had been selected because of the disappearance of EIB during  
9 the study.<sup>[19]</sup> Thus, the difference in post-exercise FEV<sub>1</sub> decline ~~by exercise~~ between the  
10 vitamin C and placebo days can be calculated for these 11 participants (the mean vitamin C effect  
11 was a reduction of 20.4 percentage points lower in the post-exercise decline in FEV<sub>1</sub>~~decline~~). Dr.  
12 Cohen was contacted, but he no longer retained ~~those~~ data. Therefore, to include the Cohen et al.  
13 trial in this meta-analysis, the FEV<sub>1</sub> values for the remaining 9 participants ~~had needed~~ to be  
14 imputed. ~~First, an overall P-value corresponding to the reported distribution of the EIB and non-EIB~~  
15 ~~cases on the vitamin C and placebo days was calculated (all were selected as suffering from EIB~~  
16 ~~before the trial), assuming that on a second measurement 85% of the EIB cases are rediagnosed as~~  
17 ~~EIB cases if there is no effective treatment. Second, this calculated P-value was then used as a~~  
18 ~~constraint for generating a minimum level of vitamin C effect for the 9 participants so that the t-test~~  
19 ~~gives the same P-value (see the Supplementary file 2 for the details of this imputation). As a~~  
20 ~~sensitivity analysis, a~~ conservative "no vitamin C effect" estimate was imputed ~~for~~ all of the 9  
21 participants with missing data (see supplementary file 2). ~~and, using this second method of~~  
22 ~~imputation, a pooled vitamin C effect was calculated for the three trials and a linear regression~~  
23 ~~model was calculated for the Cohen et al. data.~~ As a ~~second type of~~ sensitivity analysis, the Cohen  
24 et al. ~~study~~ was excluded from the meta-analysis in Fig. 1 to examine whether its exclusion  
25 influences the conclusions.

26  
27  
28  
29  
30  
31  
32  
33  
34  
35  
36  
37  
38  
39  
40  
41  
42  
43  
44 Cohen et al. also reported the number of participants who suffered from EIB after the exercise test.  
45  
46 This outcome did not require imputations and it was used as a secondary outcome for comparing the  
47 vitamin C and placebo days in the Cohen study.  
48  
49

50  
51  
52 *Statistical analysis.*  
53  
54

1  
2  
3  
4  
5  
6  
7 The statistical heterogeneity ~~in the percentage point effect~~ of the three ~~studies~~ trials was assessed ~~by~~  
8 using the  $\chi^2$ -test and the  $I^2$ -~~index~~ statistic.<sup>[24]</sup> The latter examines the percentage of total variation  
9 across studies that is due to heterogeneity ~~between studies~~ rather than ~~by randomness~~ chance. A  
10 value of  $I^2$  greater than about 70% indicates a high level of heterogeneity. Since the three identified  
11 trials showed no statistical heterogeneity, their results were pooled using the inverse variance  
12 method assuming fixed effect ~~by running the~~ with program “metagen” of the R package (see the  
13 ~~Supplementary file 2 for the details of the calculations).~~<sup>[25]</sup> The program “forest.meta” of the R  
14 package was used to construct the forest plots.

15  
16  
17  
18  
19  
20  
21  
22  
23  
24 ~~For the examination of~~ To examine the relative effect of vitamin C on post-exercise FEV<sub>1</sub> decline,  
25 ~~the relationship between~~ the vitamin C ~~effect and placebo phase~~ was modelled using the placebo-day  
26 post-exercise FEV<sub>1</sub> decline ~~as the explanatory variable, values was analyzed by~~ using the linear  
27 model “lm” program of the R package.<sup>[25]</sup> To test whether the addition of the placebo-day post-  
28 exercise FEV<sub>1</sub> decline values significantly improves the linear model, the model containing the  
29 placebo-day FEV<sub>1</sub> decline values was compared with the model without them. The improvement of  
30 the model fit was calculated from the change in  $-2 \times \log$  (likelihood), which follows the  $\chi^2$  (1 df)  
31 distribution.

32  
33  
34  
35  
36  
37  
38  
39  
40  
41 To study the effect of vitamin C on the proportion of participants who suffered from EIB in the  
42 Cohen et al. study, the mid-P value was calculated [26] and the 95% CI was calculated by using the  
43 Agresti-Caffo method.<sup>[27]</sup>

44  
45  
46  
47  
48 ~~The P values for the 2 × 2 tables were calculated using the Fisher exact test.~~ The 2-tailed P-values  
49 are presented in this text.



Table I: Trials on vitamin C supplementation and exercise-induced bronchoconstriction

| Study [ref.]                        |                   | Descriptions                                                                                                                                                                                                                                                                                                                                                                                                                  |
|-------------------------------------|-------------------|-------------------------------------------------------------------------------------------------------------------------------------------------------------------------------------------------------------------------------------------------------------------------------------------------------------------------------------------------------------------------------------------------------------------------------|
| Schachter & Schlesinger 1982 [2048] | Methods:          | Randomized, double-blind, placebo-controlled, cross-over trial.                                                                                                                                                                                                                                                                                                                                                               |
|                                     | Participants:     | 12 asthmatic subjects, selected from among workers of the Yale University in the USA, who had findings compatible with EIB: "All 12 subjects gave a characteristic description of EIB." All included participants had at least 20% reduction in MEF40% after exercise.<br>5 Males, 7 Females; mean age 26 yr (SD 5 yr).                                                                                                       |
|                                     | Type of exercise: | Exercise by using a cycloergometer was begun at a constant speed of 20 km/h against a zero workload. At the end of each 1 min interval, the workload was increased by 150 kilopondmeters per min, keeping the pedalling speed constant throughout the experiment. Exercise against progressively larger work loads was continued until either the heart rate reached 170 beats per min or the subject fatigued.               |
|                                     | Intervention:     | On 2 subsequent days, the subjects ingested 0.5 g of vitamin C or sucrose placebo in identical capsules 1.5 h before the exercise. Washout overnight.                                                                                                                                                                                                                                                                         |
|                                     | Outcome:          | Change in FEV <sub>1</sub> was calculated as: [pre-exercise vs. 5 min post-exercise]. See the Supplementary file 2.                                                                                                                                                                                                                                                                                                           |
|                                     | Notes:            | See the Supplementary file 2 for the calculation of the vitamin C effect from the individual-level data.                                                                                                                                                                                                                                                                                                                      |
| Cohen et al. 1997 [2149]            | Methods:          | Randomized, double-blind, placebo-controlled, cross-over trial.                                                                                                                                                                                                                                                                                                                                                               |
|                                     | Participants:     | 20 asthmatic subjects in Israel. All of them had demonstrated EIB by having a "decline of at least 15%" in FEV <sub>1</sub> after a standard exercise test.<br>13 Males, 7 Females; mean age 14 yr (range age 7 to 28 yr (mean 14 yr)).                                                                                                                                                                                       |
|                                     | Type of exercise: | A 7-minute exercise session using a motorized treadmill. Each subject exercised to submaximal effort at a speed and slope to provide 80% of the motional oxygen consumption as adjudged by a pulse oximeter.                                                                                                                                                                                                                  |
|                                     | Intervention:     | 2 g of vitamin C or placebo 1 hour before the exercise. Washout 1 week.                                                                                                                                                                                                                                                                                                                                                       |
|                                     | Outcomes:         | Change in FEV <sub>1</sub> was calculated as: [pre-exercise vs. 8 min post-exercise]. See the Supplementary file 2. Secondary outcome: proportion of participants who suffered from EIB after the exercise session (decline in FEV <sub>1</sub> at least 15%).                                                                                                                                                                |
|                                     | Notes:            | Individual-level data on FEV <sub>1</sub> level outcome was reported only for 11 participants of the 20 participants (Cohen's Table 2). Dr. Cohen was contacted, but he no longer had the data did not have the data any more. Therefore, a conservative "no vitamin C effect" the outcome was imputed for the 9 participants for whom experimental data were not available; see the Supplementary file 2 for details.        |
| Tecklenburg et al. 2007 [11]        | Methods:          | Randomized, double-blind, placebo-controlled, cross-over trial.                                                                                                                                                                                                                                                                                                                                                               |
|                                     | Participants:     | 8 subjects from a population of university students and the local community, Indiana USA, with physician-diagnosed mild to moderate asthma. All subjects had documented EIB as indicated by a "drop of greater than 10%" in post-exercise FEV <sub>1</sub> . They also had a history of chest tightness, shortness of breath, and intermittent wheezing following exercise.<br>2 Males, 6 Females; mean age 24.5 yr (SD 5 yr) |
|                                     | Type of exercise: | Subjects ran on a motorized treadmill, elevated by 1% per min until 85% of the age predicted max heart rate and ventilation exceeding 40–60% of predicted max voluntary ventilation. Subjects maintained this exercise intensity for 6 min. Following the 6-min steady state exercise, the grade of the treadmill continued to increase at 1% per min until volitional exhaustion.                                            |
|                                     | Intervention:     | 1.53 × 0.5 g capsules vitamin C or 3 × sucrose placebo were administered as capsules matched for color and size daily for 2 weeks. Washout 1 week. Subjects were advised to avoid high vitamin C foods during the study.                                                                                                                                                                                                      |
|                                     | Outcome:          | Change in FEV <sub>1</sub> was calculated as: [pre-exercise vs. the lowest value within 30                                                                                                                                                                                                                                                                                                                                    |

1  
2  
3  
4  
5  
6  
7  
8  
9  
10  
11  
12  
13  
14  
15  
16  
17  
18  
19  
20  
21  
22  
23  
24  
25  
26  
27  
28  
29  
30  
31  
32  
33  
34  
35  
36  
37  
38  
39  
40  
41  
42  
43  
44  
45  
46  
47  
48  
49  
50  
51  
52  
53  
54  
55  
56  
57  
58  
59  
60

| Study [ref.] |        | Descriptions                                                                                                                                                                                                                                               |
|--------------|--------|------------------------------------------------------------------------------------------------------------------------------------------------------------------------------------------------------------------------------------------------------------|
|              | Notes: | min post-exercise].<br>Dr. S. Tecklenburg kindly made the mean and SD for the paired FEV <sub>1</sub> decline available. For the decline in FEV <sub>1</sub> level, the mean difference was +6.5 percentage points (paired SD 7.4) in favour of vitamin C. |

For peer review only

## Results

Three randomized, placebo-controlled, double-blind, cross-over trials that have examined the effect of vitamin C supplementation on the decline in FEV<sub>1</sub> decline caused by exercise were retrieved. The experimental conditions were similar (Table 1). In all, the three trials had a total of 40 participants. There was no statistical heterogeneity found between the three studies for in the percentage points scale:  $I^2 = 0\%$ ;  $\chi^2(2 \text{ df}) = 1.1$ ,  $P = 0.5$ . and thus Therefore, the pooled percentage point estimate of the vitamin C effect was calculated (Fig. 1). Compared with the placebo phases, the mean reduction in post-exercise FEV<sub>1</sub> decline was, on average, 8.410.2 percentage points less during the vitamin C phases (95% CI: 4.66.7 to 12.214;  $P < 0.0001 = 10^{-8}$ ).

In the Schachter and Schlesinger study, the post-exercise FEV<sub>1</sub> decline was 17.6% for after placebo, but only 10.2% for after vitamin C (0.5 g single dose), with a difference of a 7.4 percentage points (95% CI: -0.1 to 15;  $P = 0.054$ ) improvement for their favour of vitamin C treatment. [20+8]

In the Tecklenburg et al. study, the post-exercise FEV<sub>1</sub> decline was 12.9% when on placebo, but only 6.4% when on vitamin C (1.5 g/d for 2 weeks), indicating an improvement of with a difference of 6.5 percentage points (95% CI: 0.3 to 13;  $P = 0.042$ ) in favour of for vitamin C. [11] With the conservative imputation of “no vitamin C effect” the imputed data for 9 participants in, the Cohen et al. study, there was a reduction in post-exercise FEV<sub>1</sub> decline by gives a 11.214 percentage points (95% CI: 4.8 to 18;  $P = 0.002$ ) lower post-exercise FEV<sub>1</sub> decline on the vitamin C day (2 g single dose). [21+9]

EIB is not a dichotomous condition, instead there is a continuous variation in the possible level of FEV<sub>1</sub> decline caused by exercise. A single constant fixed percentage point estimate of vitamin C effect for all people who suffer from EIB may thus be simplistic. Instead, it is possible that a

1  
2  
3  
4  
5  
6  
7 relative scale would better capture the effect of vitamin C. ~~Since~~ Schachter and Schlesinger  
8 published individual-level data for all their 12 participants,~~[2018]~~ ~~and thus~~ their data ~~were~~  
9 analyzed using linear ~~modelling~~ regression to examine ~~whether the vitamin C effect might depend~~  
10 ~~on the relationship between the placebo-day~~ post-exercise FEV<sub>1</sub> decline ~~on the vitamin C and~~  
11 ~~placebo days, i.e. on the baseline severity of EIB (Fig. 2). Adding the placebo-day~~ ~~post-exercise~~  
12 ~~FEV<sub>1</sub> decline values to the linear model improved the statistical model by  $\chi^2$  (1 df) = 16.5,~~  
13 ~~corresponding to P = 0.00005. This indicates that the linear model that includes the placebo-day~~  
14 ~~post-exercise FEV<sub>1</sub> decline explains the effect of vitamin C much better than the constant 7.4~~  
15 ~~percentage point effect for all of their participants suffering from EIB. The slope of the linear model~~  
16 ~~(Fig. 2). The slope indicates 0.45 times a 55% as high FEV<sub>1</sub> decline on the vitamin C day compared~~  
17 ~~with the placebo day (95% CI for the slope: 0.21 to 0.67). This means a 55% lower reduction in the~~  
18 ~~decline of the post-exercise FEV<sub>1</sub> decline (95% CI: 32% to 78%; P = 0.0003) for~~ ~~after~~ vitamin C  
19 administration compared with placebo. ~~Thus, in~~ the percentage points scale, ~~though there was a~~  
20 ~~trend towards a mean vitamin C effect,~~ the difference between vitamin C and placebo in the  
21 Schachter and Schlesinger trial ~~was~~ ~~only marginally not~~ significant (P = 0.054), whereas in the  
22 linear ~~model~~ regression analysis, the ~~slope indicates~~ ~~difference between the two treatments is a~~  
23 highly significant ~~difference between vitamin C and placebo~~ (P = 0.0003). ~~Consequently, the~~  
24 ~~relative effect scale better captures the effect of vitamin C on EIB.~~

25  
26  
27  
28  
29  
30  
31  
32  
33  
34  
35  
36  
37  
38  
39  
40  
41  
42 Cohen et al. published individual level data for only 11 of their 20 participants (filled  
43 ~~squares~~ triangles in Fig. 3),~~[2149]~~ ~~and~~ A conservative “no vitamin C effect” was ~~imputed~~ ~~data~~ for  
44 ~~the remaining~~ 9 participants ~~were imputed~~ (open ~~squares~~ triangles in Fig. 3). Only ~~those~~ participants  
45 who had ~~a decline in~~ post-exercise FEV<sub>1</sub> ~~decline greater than of at least~~ 15% were included in the  
46 Cohen ~~study~~ trial and therefore the horizontal variation in the Cohen data ~~was~~ narrow. ~~Forcing~~  
47 ~~Fitting~~ the linear regression line through the origin indicates ~~a 0.47 times as high post-exercise~~

1  
2  
3  
4  
5  
6  
7 FEV<sub>1</sub> decline on the vitamin C day compared with the placebo day (95% CI for the slope: 0.29 to  
8 0.65). This means a 53% a 42% reduction in lower post-exercise FEV<sub>1</sub> decline (95% CI: 19 to 64%)  
9  
10 with vitamin C administration.

11  
12  
13  
14 Tecklenburg et al. did not report individual level data for their 8 participants and the data ~~were~~was  
15 not available.[11] The mean values ~~indicate~~ 50.4% (95% CI: 2.4% to 98%) reduction in post-  
16 ~~exercise FEV<sub>1</sub> decline~~ ~~for~~ a ratio of 0.50 for the vitamin C ~~period~~ compared with the placebo  
17 ~~phase~~ post-exercise FEV<sub>1</sub> decline (6.4% and 12.9% respectively). Thus, this study also found that  
18 ~~vitamin C administration halved the EIB response.~~

19  
20  
21  
22  
23  
24  
25 There was no statistical heterogeneity found between the three studies on the relative effect scale: I<sup>2</sup>  
26 = 0%;  $\chi^2(2 \text{ df}) = 0.7, P = 0.7$ . Therefore, the pooled estimate of the relative vitamin C effect was  
27 calculated for the three trials (Fig. 4). Compared with the placebo phases, vitamin C administration  
28 reduced the post-exercise FEV<sub>1</sub> decline by 48% (95% CI: 33 to 64%; P < 0.0001).

29  
30  
31  
32  
33  
34  
35 The primary imputation of the missing data for the 9 participants of the Cohen et al. trial was based  
36 on the calculation of a P-value corresponding to the reported distribution of EIB and non-EIB cases  
37 on the vitamin C and placebo days. To test the robustness of the conclusions to the method of  
38 imputation, a conservative "no vitamin C effect" was also imputed to the 9 participants. This  
39 approach gives a pooled vitamin C effect of 8.4 percentage points (95% CI: 4.6 to 12) for the three  
40 trials. The "no vitamin C effect" imputation for the 9 participants of Cohen et al. gives a slope  
41 indicating 0.58 times as high post-exercise FEV<sub>1</sub> decline on the vitamin C day compared with the  
42 placebo day (95% CI for the slope: 0.36 to 0.80). Both of these confidence intervals are close to  
43 those calculated with the primary imputation (see above) and thus the conclusions are robust to  
44 these two different imputation approaches.  
45  
46  
47  
48  
49  
50  
51  
52  
53

1  
2  
3  
4  
5  
6  
7  
8 ~~Finally, as a second~~ sensitivity test, the Cohen et al. ~~study~~trial was excluded from the meta-  
9 analysis in Fig. 1. On the basis of the two remaining trials, the estimate of vitamin C effect on  
10 post-exercise FEV<sub>1</sub> decline became 6.8 percentage points (95% CI: 2.0 to ~~11.642~~; P = 0.005) ~~on the~~  
11 ~~basis of the two remaining trials~~. Thus, the Cohen et al. ~~study~~trial imputations are not crucial for the  
12 conclusion that vitamin C influences ~~post-exercise FEV<sub>1</sub> decline~~EIB.  
13  
14  
15  
16  
17  
18  
19

20 Finally, although Cohen et al. did not report individual-level data for post-exercise FEV<sub>1</sub> decline  
21 values for 9 of their participants, they reported the presence or absence of EIB (at least 15% decline  
22 in post-exercise FEV<sub>1</sub>) on the vitamin C and placebo days and this dichotomized FEV<sub>1</sub> outcome  
23 does not suffer from missing data. On the placebo day, 100% (20/20) of participants suffered from  
24 EIB, whereas on the vitamin C day, only 50% (10/20) suffered from EIB. This outcome gives 50  
25 percentage point decrease (95% CI: 23 to 68; P = 0.0002) in the occurrence of EIB following  
26 vitamin C administration.  
27  
28  
29  
30  
31  
32  
33  
34  
35  
36  
37  
38  
39  
40  
41  
42  
43  
44  
45  
46  
47  
48  
49  
50  
51  
52  
53  
54

## Discussion

In this meta-analysis of three randomized placebo-controlled double-blind trials, vitamin C was found to ~~reduce~~ decrease the post-exercise decline in FEV<sub>1</sub> ~~decline, on average,~~ by a mean of 8.440 percentage points (Fig. 1). Nevertheless, there is a great variation in the level of FEV<sub>1</sub> decline caused by exercise, ~~and~~ therefore it may not be reasonable to assume that a single and constant percentage point estimate of the vitamin C effect is valid for all persons suffering from EIB ~~may not be reasonable~~. Linear ~~regression analysis~~ modelling of the Schachter and Schlesinger data [2018] indicated that it is much better to study the response to ~~analyze the role of~~ vitamin C administration as a relative effect (Fig. 2). However, ~~but~~ full individual level data ~~were~~ was not available for the other two trials. ~~Nonetheless~~ Nevertheless, all three ~~studies~~ trials are consistent with vitamin C administration halving the ~~decline in~~ post-exercise decline in FEV<sub>1</sub> ~~decline~~ (Fig. 4).

Formatted

The Cohen et al. study [2149] required imputations for 9 participants ~~to include it in the meta-analysis~~, however, excluding the Cohen et al. study from ~~their exclusion did not influence the conclusions~~ percentage point meta-analysis did not influence conclusions. Furthermore, Cohen et al. reported that the number of participants who suffered from EIB dropped from 100% on the placebo day to 50% on the vitamin C day and this outcome did not require imputations, ~~yet the highly significant benefit of vitamin C was seen also in this outcome.~~

The three ~~included~~ studies included in this systematic review indicate that 0.5 to 2 g of vitamin C administration before exercise may have a beneficial effect on many people suffering from EIB. All of the three trials were double-blind placebo-controlled randomized trials so the ~~and~~ risk of bias between the trial periods ~~arms~~ is low. The total number of participants in the three trials is only 40. H ~~h~~ however, a low number of participants is a concern primarily when the results are negative, but

less so when the results are statistically highly significant.

The three trials were carried out in three different decades and on two different continents. The criteria for EIB differed and the mean age of participants was 14 yr in the Cohen study but 25 and 26 years in the two other studies. Still, all the studies found a 50% reduction in the post-exercise FEV<sub>1</sub> decline. It is not evident how far this 50% estimate can be generalized, but the close estimate in such different studies suggests that the estimate may be valid also for several other people who suffer from EIB.

As to the effect of vitamin C on physically stressed people, a few studies on the common cold have some relevance to~~are relevant in parallel with~~ the EIB trials. Although vitamin C supplementation had no preventive effect against colds in the general community, the administration of vitamin C halved the incidence of colds in five randomized placebo-controlled trials that studied subjects with participants under heavy acute physical stress.[14,15] Three of the studies~~trials~~ were on~~with~~ marathon runners,[284-3026] one study used~~with~~ Canadian soldiers in a northern training exercise,[3127] and one study was on~~with~~ schoolchildren in a skiing camp in the Swiss Alps.[3228] In the general population~~community~~, acute cough and sore throat usually indicates a viral etiology. However, it is not obvious that such symptoms occurring after a marathon run need not be~~are~~ caused by a viral infection, instead~~as~~ they can result from ~~an~~ injury to runners' airways caused by hours of exceptional ventilatory exertion.[2] Thus, the three common cold studies of marathon runners may have been partly measuring, at least in part, the effect of vitamin C on the injury to~~on~~ their airways instead of the effect on viral infections.[33]

In their trial with marathon runners, Peters et al. recorded the "self reported symptoms including a running nose, sneezing, sore throat, cough" during a 2-week period after the race.[24] The incidence



1  
2  
3  
4  
5  
6  
7 of post-race cough was reduced by 71% in the vitamin C group as compared to the placebo group ( $P$   
8  $=0.02$ ; 4/43 vs. 13/41). The incidence of sore throat was reduced by 67% in the vitamin C group ( $P$   
9  $=0.006$ ; 8/43 vs. 23/41). In contrast, vitamin C had no effect on the incidence of runny nose ( $P$   
10  $=0.2$ ), which is a typical symptom of rhinovirus infections.[29,30] Peters et al. did not carry out  
11 virologic or pulmonary function tests in their study and therefore the etiology of cough and sore  
12 throat is uncertain.[24] In any case, there is no basis to assume that viruses were the only cause of  
13 respiratory symptoms after the marathon race. It is thus possible that the common cold studies with  
14 marathon runners have been measuring, at least in part, the effect of vitamin C on EIB-type  
15 symptoms.

16  
17  
18  
19  
20  
21  
22  
23  
24  
25 A recent study in Israel found that vitamin C halved the duration of common cold type symptoms in  
26 male adolescent competitive swimmers, but no benefit was ~~found~~ seen in females.[344] Here too,  
27 the etiology is unclear and the respiratory symptoms might as well have been caused, or partly  
28 caused at least in part, by non-infectious irritation of swimmers' airways.

29  
30  
31  
32  
33  
34  
35 In evidence-based medicine the primary question is whether an intervention has effects on clinically  
36 relevant outcomes, on symptoms and signs such as ~~symptoms like~~ coughs. With such a perspective,  
37 the etiology of respiratory symptoms is not of ~~prime~~ primary importance. Thus, in addition to the  
38 three EIB trials analyzed in this systematic review, six common cold ~~studies~~ trials have reported the  
39 ~~found~~ benefits of vitamin C administration for against respiratory symptoms of people under heavy  
40 physical stress. Given the low cost and safety of vitamin C,[15,352] and the consistency of positive  
41 findings in the ~~three~~ nine studies on EIB and the six studies on the common cold studies, it seems  
42 reasonable for physically fit and active people to test vitamin C on an individual basis if they have  
43 respiratory symptoms such as cough associated with exercise.

1  
2  
3  
4  
5  
6 Promising results in the EIB and common cold ~~studies~~ indicate that further research on vitamin  
7 C and respiratory symptoms of physically active people are warranted. In future trials, statistical  
8 modelling should be used to examine the effect of vitamin C on FEV<sub>1</sub> levels, instead of simply  
9 calculating the percentage point estimates. Although the primary question in the evidence-based  
10 medicine framework is to assess the effectiveness of vitamin C on clinically relevant outcomes, the  
11 etiology of the respiratory symptoms should also be investigated in ~~the~~ future investigation~~studies~~.

## Acknowledgements

22  
23  
24  
25  
26  
27 The author thanks Dr. Tecklenburg who kindly supplied supplementary data for this analysis. The  
28 author also thanks I am grateful to Elizabeth Stovold for her contributions to an early version of this  
29 manuscript, by helping in the literature searches, considering studies for inclusion, and extracting  
30 data for the meta-analysis.  
31  
32  
33  
34  
35  
36  
37  
38  
39  
40  
41  
42  
43  
44  
45  
46  
47  
48  
49  
50  
51  
52  
53  
54

## Legends to Figures

Fig. 1. Percentage point effect of vitamin C on the decline in FEV<sub>1</sub> decline caused by exercise. ~~For the three trials, t~~ The vertical lines indicate the 95% CI for the three trials and the box in the middle of the lines indicates the mean effect of the study. The diamond shape at the bottom indicates the 95% CI for the pooled effect. ~~Tests of heterogeneity:  $I^2 = 53\%$ ;  $\chi^2(2 \text{ df}) = 4.2$ ,  $P = 0.12$ .~~ TE, treatment effect; seTE, standard error of the TE; W, weight of the study.

Fig. 2. The effect of vitamin C Comparison of on post-exercise FEV<sub>1</sub> decline as a function of the placebo-day post-exercise FEV<sub>1</sub> decline for the on-vitamin C and placebo periods Schachter and Schelesinger study trial. [2018] The squares show the 12 participants of the study trial. The vertical axis shows the difference in post-exercise FEV<sub>1</sub> decline between the vitamin C and the placebo days. The horizontal axis shows the post-exercise FEV<sub>1</sub> decline on the placebo day. The black line indicates the fitted linear regression line. The horizontal dash (-) line indicates the level of identity between vitamin C and placebo. See the Supplementary file 2 for the calculations of the FEV<sub>1</sub> declines. The thick black line indicate the linear regression line and the thin line indicates the identity of vitamin C and placebo treatments. For the linear regression model, the  $R^2 = 0.65$  and, compared with unity, the test of the slope gives  $P = 0.0003$ .

Fig. 3. The effect of vitamin C Comparison of post-exercise FEV<sub>1</sub> decline on vitamin C and placebo periods in the on post-exercise FEV<sub>1</sub> decline as a function of the placebo-day post-exercise FEV<sub>1</sub> decline for the Cohen et al. study trial. [2149] The filled squares/triangles show the 11 participants of the for whom data werewas reported and the empty squares/triangles show the 9 participants to

1  
2  
3  
4  
5  
6 whom the conservative “no vitamin C effect” data were imputed. The vertical axis shows the  
7 difference in post-exercise FEV<sub>1</sub> decline between the vitamin C and the placebo days. The  
8 horizontal axis shows the post-exercise FEV<sub>1</sub> decline on the placebo day. The black line indicates  
9 the fitted linear regression line. The horizontal dash (-) line indicates the level of identity between  
10 vitamin C and placebo. see the Supplementary file 2 for the imputation. The thick black line  
11 indicate the linear regression line and the thin line indicates the identity of vitamin C and placebo  
12 treatments. The linear regression line was ~~fitted~~forced through the origin, since the variation in the  
13 placebo-day FEV<sub>1</sub> decline values is narrow. See the supplementary file 2 for the calculations.  
14  
15  
16  
17  
18  
19  
20  
21  
22

23 Fig. 4. Relative effect of vitamin C on the decline in FEV<sub>1</sub> caused by exercise. The vertical lines  
24 indicate the 95% CI for the three trials and the box in the middle of the lines indicates the mean  
25 effect of the study. The diamond shape at the bottom indicates the 95% CI for the pooled effect. The  
26 estimates for the Schachter 1982 and Cohen 1997 studies are based on the slopes of the linear  
27 models in Figs. 3 and 4. The estimates for the Tecklenburg 2007 study are the study mean estimates.  
28 TE, treatment effect; seTE, standard error of the TE; W, weight of the study.  
29  
30  
31  
32  
33  
34  
35  
36  
37  
38  
39  
40  
41  
42  
43  
44  
45  
46  
47  
48  
49  
50  
51  
52  
53  
54  
55  
56  
57  
58  
59  
60

## References

- 1 Weiler JM, Anderson SD, Randolph C. Pathogenesis, prevalence, diagnosis, and management of exercise-induced bronchoconstriction. *Ann Allergy Asthma Immunol* 2010;105(6 Suppl):S1-47. doi:10.1016/j.anai.2010.09.021
- 2 Anderson SD, Kippelen P. Airway injury as a mechanism for exercise-induced bronchoconstriction in elite athletes. *J Allergy Clin Immunol* 2008;122:225-235. doi:10.1016/j.jaci.2008.05.001
- 3 Buchvald F, Hermansen MN, Nielsen KG, et al. Exhaled nitric oxide predicts exercise-induced bronchoconstriction in asthmatic school children. *Chest* 2005;128:1964-1967. doi:10.1378/chest.128.4.1964
- 4 Puglisi L, Berti F, Bosisio E, et al. Ascorbic acid and PGF<sub>2</sub> $\alpha$  antagonism on tracheal smooth muscle. *Adv Prostaglandin Tromboxane Res* 1976;1:503-506.
- 5 Rothberg KG, Hitchcock M. Effects of ascorbic acid deficiency on the in vitro biosynthesis of cyclooxygenase metabolites in guinea pig lungs. *Prostaglandins Leukot Med* 1983;12:137-147. doi:10.1016/0262-1746(83)90077-X
- 6 Mohsenin V, Tremml PG, Rothberg KG, et al. Airway responsiveness and prostaglandin generation in scorbutic guinea pigs. *Prostaglandins, Leukot Essent Fatty Acids* 1988;33:149-155.
- 7 Zuskin E, Lewis AJ, Bouhuys A. Inhibition of histamine-induced airway constriction by ascorbic acid. *J Allergy Clin Immunol* 1973;51:218-226. doi:10.1016/0091-6749(73)90141-3
- 8 Sipahi E, Ercan ZS. The mechanism of the relaxing effect of ascorbic acid in guinea pig isolated tracheal muscle. *Gen Pharmacol* 1997;28:757-760. doi:10.1016/S0306-3623(96)00277-7
- 9 Ogilvy CS, DuBois AB, Douglas JS. Effects of ascorbic acid and indomethacin on the

- 1  
2  
3  
4  
5  
6  
7  
8  
9  
10  
11  
12  
13  
14  
15  
16  
17  
18  
19  
20  
21  
22  
23  
24  
25  
26  
27  
28  
29  
30  
31  
32  
33  
34  
35  
36  
37  
38  
39  
40  
41  
42  
43  
44  
45  
46  
47  
48  
49  
50  
51  
52  
53  
54  
55  
56  
57  
58  
59  
60
- airways of healthy male subjects with and without induced bronchoconstriction. *J Allergy Clin Immunol* 1981;67:363-369. doi:10.1016/0091-6749(81)90081-6
- 10 Mohsenin V, Dubois AB, Douglas JS. Effect of ascorbic acid on response to methacholine challenge in asthmatic subjects. *Am Rev Respir Dis* 1983;127:143-147.
- 11 Tecklenburg SL, Mickleborough TD, Fly AD, et al. Ascorbic acid supplementation attenuates exercise-induced bronchoconstriction in patients with asthma. *Respir Med* 2007;101:1770-1778. doi:10.1016/j.rmed.2007.02.014
- 12 [Powers SK, Jackson MJ. Exercise-induced oxidative stress: cellular mechanisms and impact on muscle force production. \*Physiol Rev\*. 2008;88:1243-76. doi:10.1152/physrev.00031.2007](#)
- 13 [Ashton T, Young IS, Peters JR, et al. Electron spin resonance spectroscopy, exercise, and oxidative stress: an ascorbic acid intervention study. \*J Appl Physiol\* 1999;87:2032-6. <http://www.ncbi.nlm.nih.gov/pubmed/10601146>](#)
- 14 [Hemilä H. Vitamin C and common cold incidence: a review of studies with subjects under heavy physical stress. \*Int J Sports Med\* 1996;17:379-383. doi:10.1055/s-2007-972864 Available at: <http://hdl.handle.net/10250/7983> \(accessed 2 Mar 2013\)](#)
- 15 [Hemilä H, Chalker E. Vitamin C for preventing and treating the common cold. \*Cochrane Database Syst Rev\* 2013;\(1\):CD000980. doi:10.1002/14651858.CD000980.pub4](#)
- 16 ~~42~~ Hemilä H. Vitamin C supplementation and common cold symptoms: problems with inaccurate reviews. *Nutrition* 1996;12:804-809. doi:10.1016/S0899-9007(96)00223-7 Available at: <http://hdl.handle.net/10250/7979> (accessed 2 Mar 2013)
- 17 ~~53~~ Hemilä H, Louhiala P. Vitamin C may affect lung infections. *J R Soc Med* 2007;100:495-498. doi:10.1258/jrsm.100.11.495
- 18 ~~64~~ [Hemilä H, Chalker E, Douglas B. Vitamin C for preventing and treating the common cold. \*Cochrane Database Syst Rev\* 2013;07;\(13\):CD000980. doi:10.1002/14651858.CD000980.pub34](#)

- 1  
2  
3  
4  
5  
6  
7 ~~157~~ Hemilä H. Vitamin C and common cold incidence: a review of studies with subjects under  
8 heavy physical stress. *Int J Sports Med* 1996;17:379-383. doi:10.1055/s-2007-972864  
9  
10 ~~186~~ Kaur B, Rowe BH, ~~Stovold~~Arnold E. Vitamin C supplementation for asthma. Cochrane  
11 Database Syst Rev 2009;(1):CD000993. doi:10.1002/14651858.CD000993.pub3  
12  
13  
14 ~~197~~ Hemilä H. Feedback. In: Kaur B, Rowe BH, ~~Stovold~~Arnold E. Vitamin C supplementation for  
15 asthma. Cochrane Database Syst Rev 2009;(1):CD000993.  
16 doi:10.1002/14651858.CD000993.pub3  
17  
18 Available at: <http://hdl.handle.net/10138/38500> (accessed 7 Mar 2013)  
19  
20  
21 ~~2048~~ Schachter EN, Schlesinger A. The attenuation of exercise-induced bronchospasm by ascorbic  
22 acid. *Ann Allergy* 1982;49:146-151.  
23  
24 <http://www.ncbi.nlm.nih.gov/pubmed/7114587>  
25  
26  
27 ~~2149~~ Cohen HA, Neuman I, Nahum H. Blocking effect of vitamin C in exercise-induced asthma.  
28 *Arch Pediatr Adolescent Med* 1997;151:367-370.  
29  
30 doi:10.1001/archpedi.1997.02170410041005  
31  
32  
33 ~~229~~ Miric M, Haxhiu MA. Effect of vitamin C on exercise-induced bronchoconstriction [Serbo-  
34 Croatian]. *Plucne Bolesti* 1991;43:94-97.  
35  
36 <http://www.ncbi.nlm.nih.gov/pubmed/1766998>  
37  
38  
39 ~~234~~ Murphy JD, Ferguson CS, Brown KR, et al. The effect of dietary antioxidants on lung  
40 function in exercise induced asthma [abstract]. *Med Sci Sports Exerc* 2002;34(5 Suppl):S155.  
41  
42  
43 ~~242~~ Higgins JPT, Thompson SG, Deeks JJ, et al. Measuring inconsistency in meta-analysis. *BMJ*  
44 2003;327:557-560. doi:10.1136/bmj.327.7414.557  
45  
46 ~~253~~ The R Project for Statistical Computing. <http://www.r-project.org/> (accessed 7 Mar 2013-26 Nov  
47 2012)  
48  
49  
50 ~~26~~ Lydersen S, Fagerland MW, Laake P. Recommended tests for association in 2 x 2 tables. *Stat*  
51 *Med* 2009;28:1159-75. doi:10.1002/sim.3531  
52  
53 <http://www.ncbi.nlm.nih.gov/pubmed/19170020>  
54

- 1  
2  
3  
4  
5  
6  
7 [27 Fagerland MW, Lydersen S, Laake P. Recommended confidence intervals for two independent](#)  
8 [binomial proportions. Stat Methods Med Res 2011 \(in press\).](#)  
9 [doi:10.1177/0962280211415469](#)  
10  
11  
12 [284 Peters EM, Goetzsche JM, Grobelaar B, et al. Vitamin C supplementation reduces the](#)  
13 [incidence of posttrace symptoms of upper-respiratory-tract infection in ultramarathon runners.](#)  
14 [Am J Clin Nutr 1993;57:170-174.](#)  
15  
16  
17 [295 Peters EM, Goetzsche JM, Joseph LE, et al. Vitamin C as effective as combinations of anti-](#)  
18 [oxidant nutrients in reducing symptoms of upper respiratory tract infection in ultramarathon](#)  
19 [runners. S Afr J Sports Med 1996;11:23-27.](#)  
20  
21  
22 [3026 Moolla ME. The effect of supplemental anti-oxidants on the incidence and severity of upper](#)  
23 [respiratory tract infections in ultra-marathon runners \[MSc Thesis\]. South Africa: University](#)  
24 [of Cape Town; 1996.](#)  
25  
26  
27  
28 [3127 Sabiston BH, Radomski MW. Health Problems and Vitamin C in Canadian Northern Military](#)  
29 [Operations. DCIEM Report no. 74-R-1012. Downsview, Ontario, Canada: Defence and Civil](#)  
30 [Institute of Environmental Medicine; 1974, 10 pp. Available at:](#)  
31 [http://www.mv.helsinki.fi/home/hemila/CC/Sabiston\\_1974\\_ch.pdf \(accessed 7 Mar 2013-26 Nov 2012\)](#)  
32  
33  
34  
35 [3228 Ritzel G. Critical analysis of the role of vitamin C in the treatment of the common cold \[in](#)  
36 [German\]. Helv Med Acta 1961;28:63-68. Translation at:](#)  
37 [http://www.mv.helsinki.fi/home/hemila/T3.pdf \(accessed 7 Mar 2013-26 Nov 2012\)](#)  
38  
39  
40  
41  
42 ~~[29 Rao SS, Hendley JO, Hayden FG, et al. Symptom expression in natural and experimental](#)~~  
43 ~~[rhinovirus colds. Am J Rhinol 1995;9:49-52. doi:10.2500/105065895781874114](#)~~  
44  
45  
46 ~~[30 Arruda E, Pitkäranta A, Witek TJ Jr, et al. Frequency and natural history of rhinovirus](#)~~  
47 ~~[infections in adults during autumn. J Clin Microbiol 1997;35:2864-2868.](#)~~  
48  
49  
50 [33 Hemilä H. Vitamin C and exercise-induced bronchoconstriction in athletes. J Allergy Clin](#)  
51 [Immunol 2009;123:274-275. doi:10.1016/j.jaci.2008.10.004](#)  
52  
53  
54

Formatted

Formatted



- 1  
2  
3  
4  
5  
6  
7 | 34+ Constantini NW, Dubnov-Raz G, Eyal BB, et al. The effect of vitamin C on upper respiratory  
8 | infections in adolescent swimmers: a randomized trial. *Eur J Pediatr* 2011;170:59-63.  
9 | doi:10.1007/s00431-010-1270-z  
10 |  
11 |  
12 | 352 Hathcock JN, Azzi A, Blumberg J, et al. Vitamins E and C are safe across a broad range of  
13 | intakes. *Am J Clin Nutr* 2005;81:736-745.  
14 |  
15 |  
16 |  
17 |  
18 |  
19 |  
20 |  
21 |  
22 |  
23 |  
24 |  
25 |  
26 |  
27 |  
28 |  
29 |  
30 |  
31 |  
32 |  
33 |  
34 |  
35 |  
36 |  
37 |  
38 |  
39 |  
40 |  
41 |  
42 |  
43 |  
44 |  
45 |  
46 |  
47 |  
48 |  
49 |  
50 |  
51 |  
52 |  
53 |  
54 |

1  
2  
3  
4  
5  
6  
7  
8  
9  
10  
11  
12  
13  
14  
15  
16  
17  
18  
19  
20  
21  
22  
23  
24  
25  
26  
27  
28  
29  
30  
31  
32  
33  
34  
35  
36  
37  
38  
39  
40  
41  
42  
43  
44  
45  
46

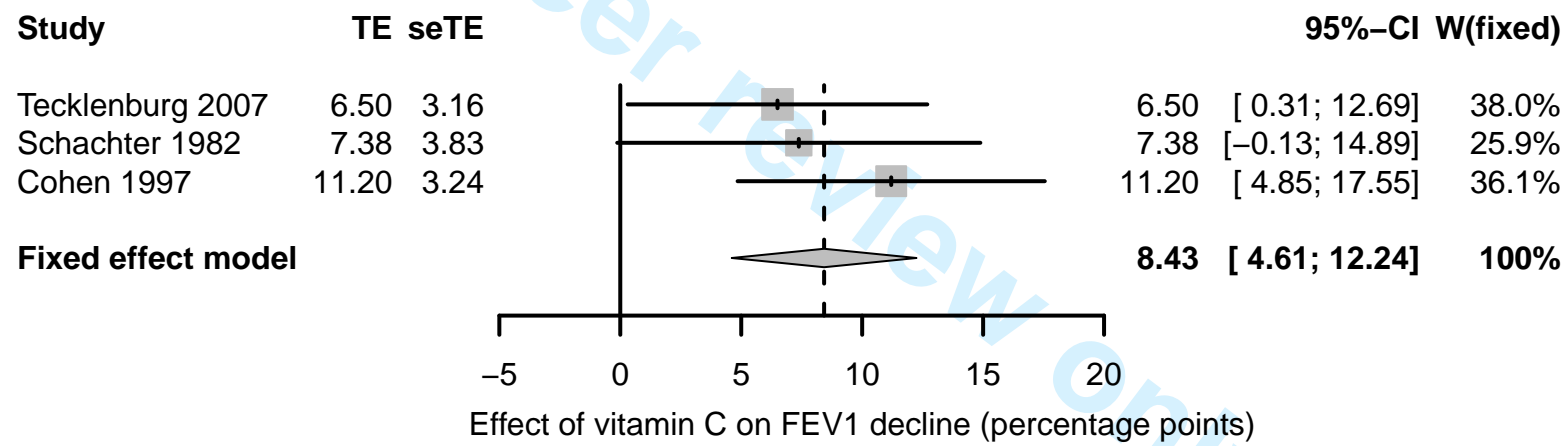

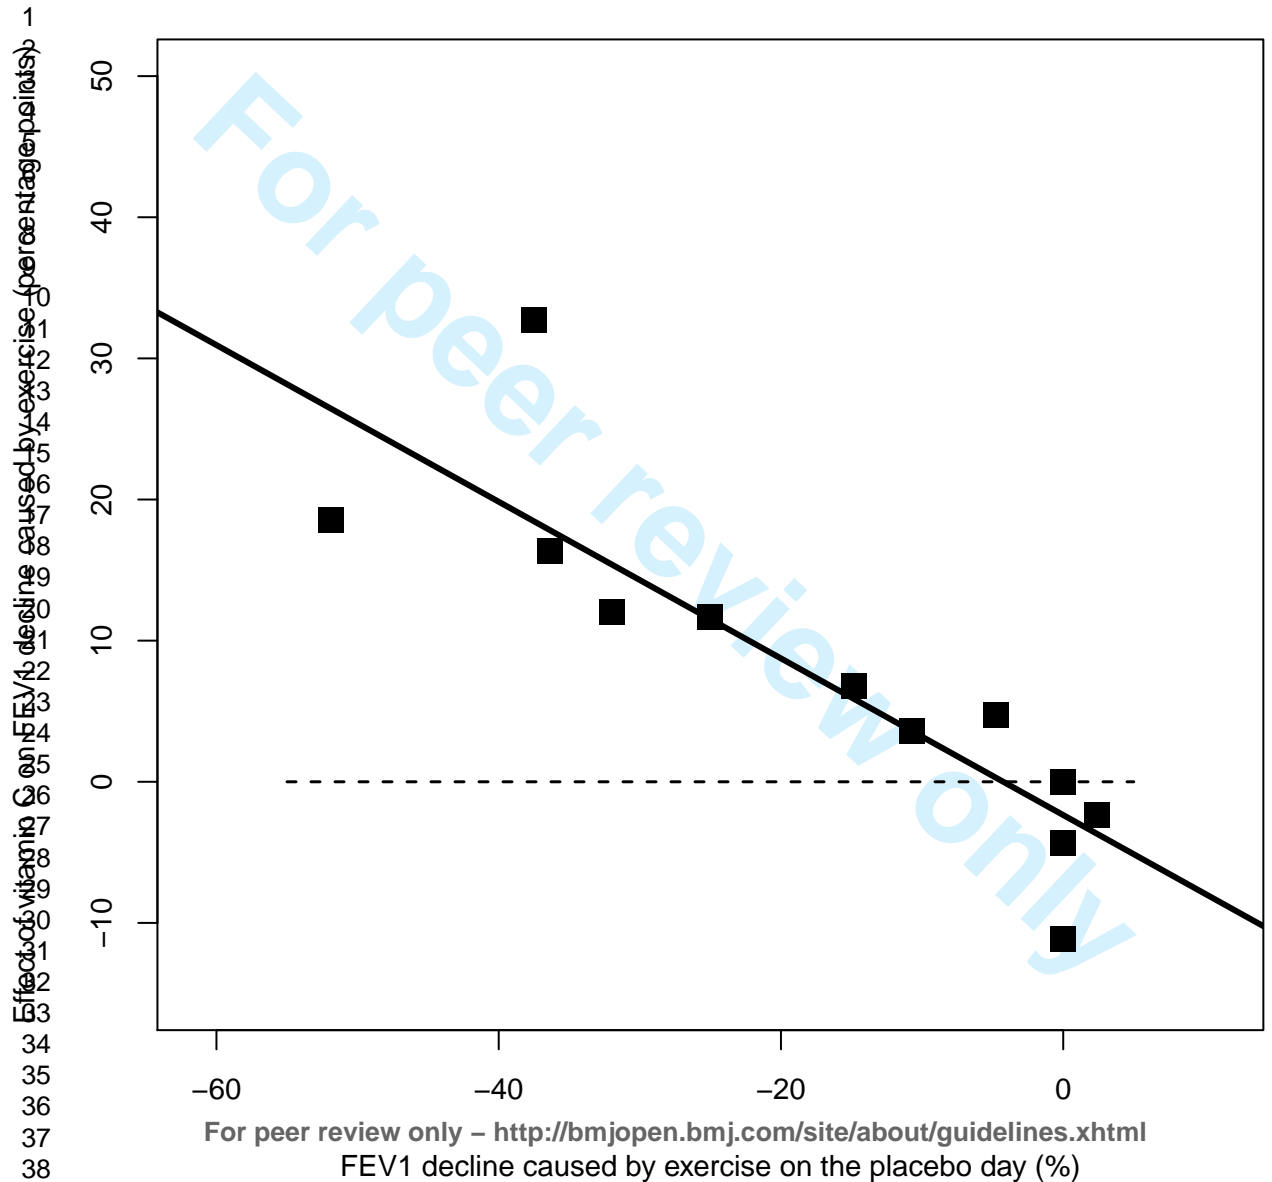

For peer review only – <http://bmjopen.bmj.com/site/about/guidelines.xhtml>

FEV1 decline caused by exercise on the placebo day (%)

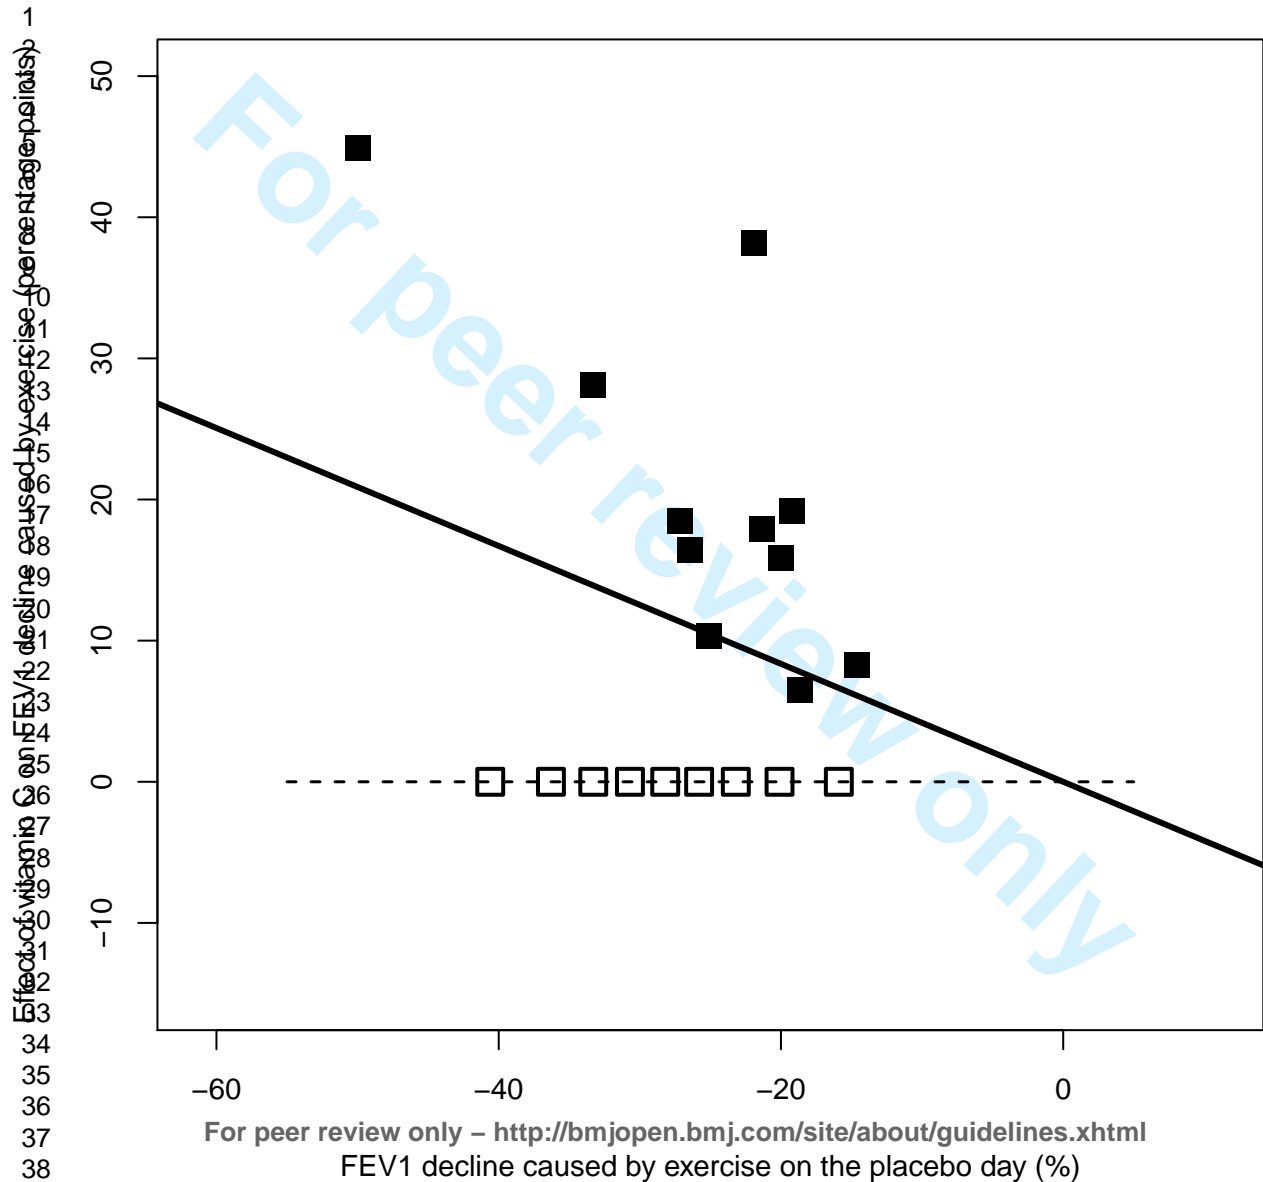

For peer review only – <http://bmjopen.bmj.com/site/about/guidelines.xhtml>

FEV1 decline caused by exercise on the placebo day (%)

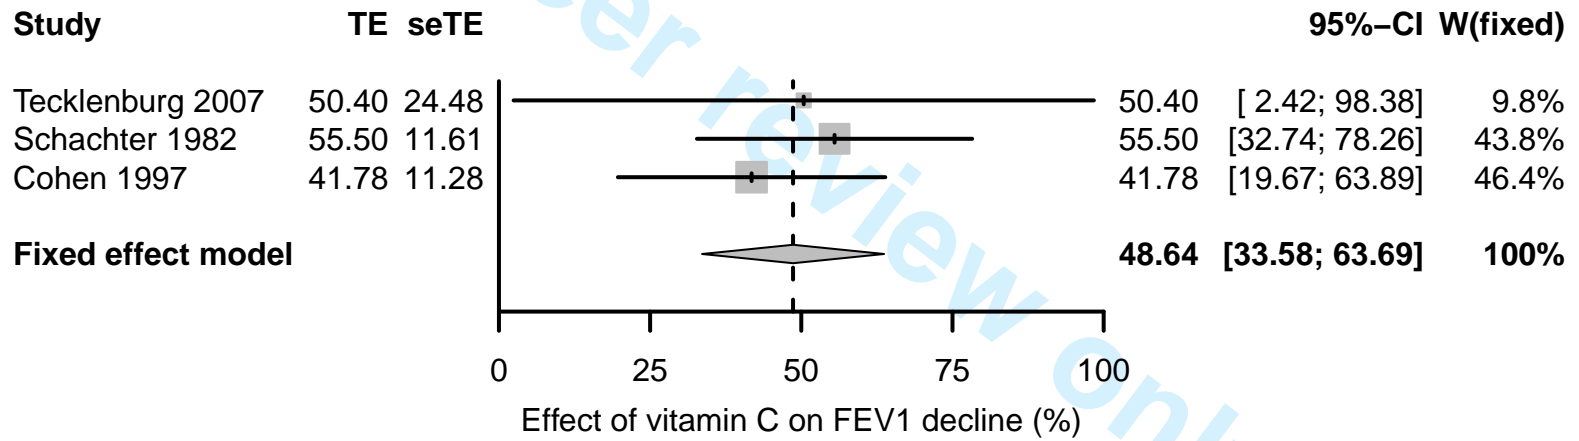

1  
2  
3  
4  
5  
6  
7  
8  
9  
10  
11  
12  
13  
14  
15  
16  
17  
18  
19  
20  
21  
22  
23  
24  
25  
26  
27  
28  
29  
30  
31  
32  
33  
34  
35  
36  
37  
38  
39  
40  
41  
42  
43  
44  
45  
46  
47  
48  
49  
50  
51  
52  
53  
54  
55  
56  
57  
58  
59  
60

Supplementary file 1

Vitamin C may alleviate exercise-induced bronchoconstriction: a meta-analysis  
Harri Hemilä

Flow diagram of the literature search 12 Feb 2013

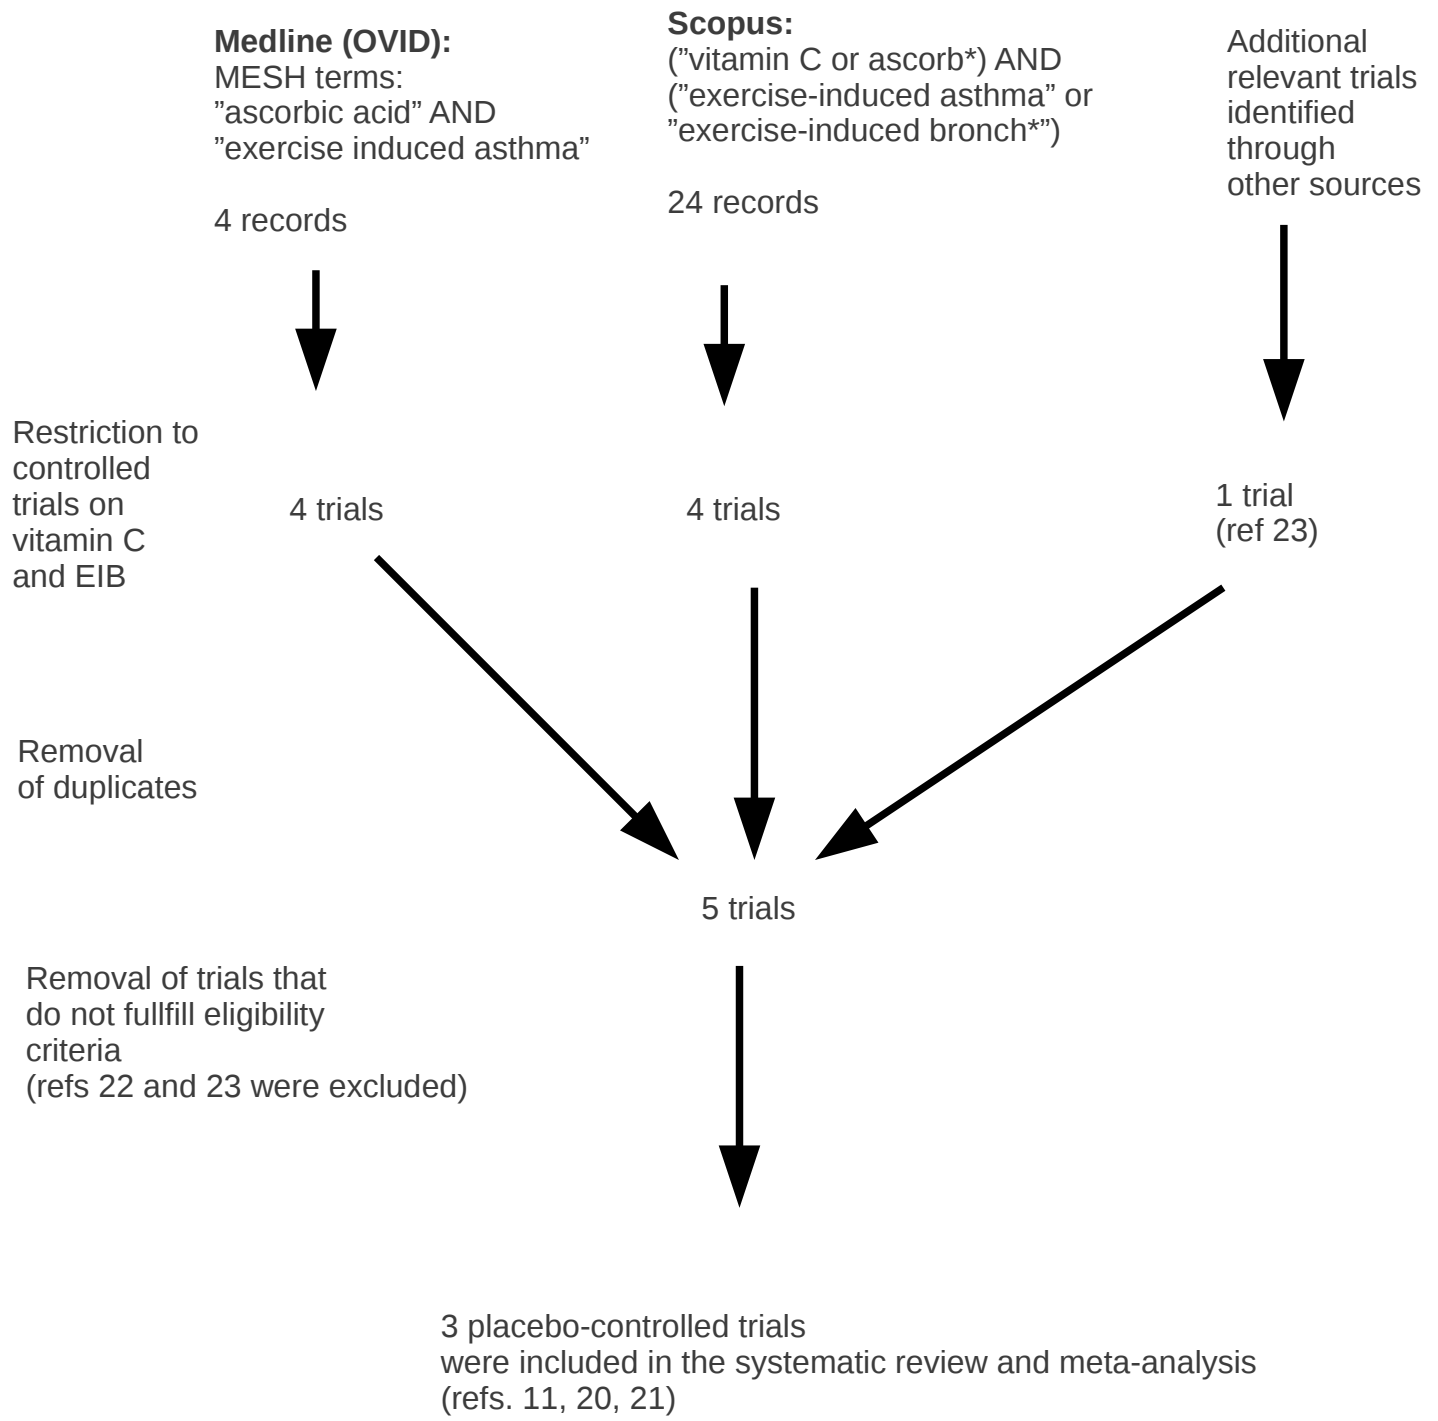

1  
2  
3  
4  
5  
6  
7  
8  
9  
10  
11  
12  
13  
14  
15  
16  
17  
18  
19  
20  
21  
22  
23  
24  
25  
26  
27  
28  
29  
30  
31  
32  
33  
34  
35  
36  
37  
38  
39  
40  
41  
42  
43  
44  
45  
46  
47  
48  
49

Harri Hemilä 2013

## Supplementary file 2

### Vitamin C may alleviate exercise-induced bronchoconstriction: a meta-analysis

Harri Hemilä  
Department of Public Health  
University of Helsinki  
Helsinki  
Finland  
harri.hemila@helsinki.fi  
<http://www.mv.helsinki.fi/home/hemila/>

March 7, 2013

**Cohen 1997 2x2**      **Calculation of the P-value for the vitamin C effect on the occurrence of EIB after exercise session**

<http://www.ncbi.nlm.nih.gov/pubmed/9111435>

<http://dx.doi.org/10.1001/archpedi.1997.02170410041005>

Fig 2 data, see:

<http://www.mv.helsinki.fi/home/hemila/A/Cohen.htm>

Cohen studied 20 participants who suffered from EIB, which was the inclusion criterion.

EIB was defined as post-exercise FEV1 decline of "at least 15%".

Cohen reported the number of participants who suffered from EIB after the exercise session on both vitamin C and placebo days.

This secondary outcome does not need any imputations, since there are data for all participants (Cohen's Fig. 2).

The following change to Fig. 2 data was made:

Cohen's Table 2 describes that, on the vitamin C day, patient #10 had post-exercise FEV1 decline of 15% (accurately 14.81%) and should be classified as EIB.

Thus, on the placebo day, all 20 participants suffered from EIB (FEV1 decline "at least 15%") (20-0).

With the above correction, on the vitamin C day, 10 participants suffered from EIB (FEV1 decline "at least 15%") and 10 did not (10-10).

The P-value, and the RR and its 95%CI can be calculated for the effect of vitamin C on the occurrence of EIB after exercise.

There are many ways to calculate P-values for 2x2 tables, see e.g. Lydersen et al.:

<http://www.ncbi.nlm.nih.gov/pubmed/19170020>

The above paper by Lydersen et al shows that the Fisher exact test is too conservative (too large P-values) and the paper strongly discourages its use.

Instead the above paper encourages the use of the mid-P modification of the Fisher test.

For the Cohen 2x2 table (20-0 vs 10-10)

Mid-P(1-tail) = 0.00011

Mid-P(2-tail) = 0.00022

However, mid-P does not take into account that all participants suffered from EIB, which was an inclusion criterion.

If this is taken into account, a still smaller P value is obtained, see bottom of this sheet

That approach gives:

P(1-tail) = 0.00001

P(2-tail) = 0.00002



Harri Hemilä 2013

**Calculation of the 95% CI for the Cohen 2x2 table by the Agresti-Caffo -method**

For the calculation formulas, see Fagerland et al. 2011:  
<http://www.ncbi.nlm.nih.gov/pubmed/21996567>

|                      |             |             |                      |               |               |
|----------------------|-------------|-------------|----------------------|---------------|---------------|
|                      | Vit C day   | Placebo day |                      |               |               |
| EIB cases            | 10          | 20          | Percentage point     |               |               |
| All participants     | 20          | 20          | Difference           |               |               |
| Percentage           | 50%         | 100%        | <b>-50%</b>          |               |               |
| <br>                 |             |             |                      |               |               |
| <b>Adjusted</b>      | Vit C day   | Placebo day | Vit C day            | Placebo day   |               |
|                      |             |             | p2                   | p1            |               |
| EIB cases            | 11          | 21          | p=                   | 0.50          | 0.95          |
| All participants (n) | 22          | 22          | (1-p)=               | 0.50          | 0.05          |
|                      |             |             | p*(1-p)=             | 0.25          | 0.04          |
|                      |             |             | p*(1-p)/n=           | 0.01136       | 0.00197       |
|                      |             |             | sum=                 |               | 0.01334       |
|                      |             |             | sqrt(sum)=           |               | 0.12          |
|                      |             |             | p1-p2=               | -45%          |               |
|                      |             |             | z(P=0.025)           | 1.96          |               |
| <br>                 |             |             |                      |               |               |
| <b>Estimate:</b>     | <b>-50%</b> |             | <b>Agresti-Caffo</b> | <b>Low</b>    | <b>High</b>   |
|                      |             |             | <b>95% CI:</b>       | <b>-68.1%</b> | <b>-22.8%</b> |

**Calculating a more realistic P-value for the Cohen 2x2 table, taking into account that all participants suffered from EIB**

Given that all of Cohen's participants were selected as EIB cases, the mid-P value is conservative.

The approach below describes a more realistic, but more complex, calculation for the P-value of the observed 20-0 vs 10-10 difference.

Only the mid-P value is reported in the meta-analysis of vitamin C and EIB, but this calculation below shows that the mid-P is conservative.

Some characteristics and diseases are permanent and can be accurately diagnosed, e.g. sex and many genetic diseases.

However, EIB is not permanent nor highly accurate.

Cohen defined EIB as a decline of "at least 15%" in FEV1 because of exercise.

Because of the selection, it is not surprising that all 20 participants had EIB response also on the placebo day.

Nevertheless, this does not mean that the initial EIB diagnosis was 100% accurate and that EIB was a permanent characteristic of the participants.

Lets assume that 95% of the selected participants had EIB on the second exercise test.

If  $P(\text{rediagnosis}) = 0.95$ , then a series of repeated 20 EIB findings on the placebo day is highly improbable; 1-tail) = 0.36

Nevertheless, such a high probability for a rediagnosis (95%) seems unrealistic.

Lets assume a lower accuracy so that on average 75% of participants had EIB on the second exercise test.

If  $P(\text{rediagnosis}) = 0.75$ , then a series of repeated 20 EIB findings on the placebo day is highly improbable; 1-tail) = 0.003

If  $P(\text{rediagnosis})$  is lower than 75%, the probability for observing 20 EIB cases on the placebo day becomes still more and more unlikely.

However, given that all 20 participants were selected as EIB cases, the probability that all of them had EIB on the placebo day cannot be very low.

Between the above extreme values for  $P(\text{rediagnosis})$ , there are values that give reasonable basis for estimating the P- value for the observation 20-0 vs 10-10 .

Harri Hemilä 2013

Below, a set of P(rediagnosis) values are selected,  
 and the calculation gives the probability of getting (on the assumption that vitamin C and placebo do not differ):  
 a) the 20 EIB observations on the placebo day  
 b) the 10-10 split on the vitamin C day (with its tail: 9-11 and 8-12 etc.)  
 c) the combined probability for 20-0 and 10-10 on the placebo and vitamin C days, respectively.

| Single person probability for being rediagnosed as an EIB case on a second test | Placebo day<br>Probability for the observation<br>20 EIB + 0 No-EIB | Vit C day<br>Probability for the observation<br>10 EIB + 10 No-EIB | For the binomial distribution:<br>20 No. Participants<br>10 No. EIB on vit C day |  |
|---------------------------------------------------------------------------------|---------------------------------------------------------------------|--------------------------------------------------------------------|----------------------------------------------------------------------------------|--|
| P(rediagnosis)<br>Pr                                                            | P(plac day, 1-t)<br>[= Pr exp(20)]                                  | P(vitC day, 1-t)<br>Binomial with the tail                         | 2 x 2 table<br>P(total; 1-tail) = P(plac) * P(vitC)                              |  |
| 0.95                                                                            | 0.36                                                                | 0.00000001                                                         | 0.000000004                                                                      |  |
| 0.90                                                                            | 0.12                                                                | 0.000007                                                           | 0.0000009                                                                        |  |
| 0.85                                                                            | 0.039                                                               | 0.000248                                                           | 0.0000096                                                                        |  |
| 0.80                                                                            | 0.012                                                               | 0.0026                                                             | 0.000030                                                                         |  |
| 0.75                                                                            | 0.0032                                                              | 0.014                                                              | 0.000044                                                                         |  |

Assuming P(rediagnosis) = 0.95 makes the placebo day observation probable, however the vitamin C day observation and the combined observation would be extremely unlikely. Thus, if 0.95 is assumed, then the evidence of vitamin C effect is very strong (very low P)

Assuming P(rediagnosis) = 0.75 makes the vitamin C day observation more likely, however the placebo day observation would become highly unlikely (not reasonable given that all had EIB). Furthermore, lower P-value for the vitamin C day than for the placebo day is not reasonable (all had EIB) The resulting combined P-value is quite close to the mid-P shown above.

Assuming P(rediagnosis) = 0.85 makes the placebo day observation marginally probable (P = 0.04). Thus, 0.85 is a reasonable assumption. With this assumption, the combined P is a magnitude smaller than the mid-P shown above.

**Cohen 1997 Imputation**<http://www.ncbi.nlm.nih.gov/pubmed/9111435><http://dx.doi.org/10.1001/archpedi.1997.02170410041005>

Table 1 and Table 2, see:

<http://www.mv.helsinki.fi/home/hemila/A/Cohen.htm>

On their Table 2, Cohen reported the post-exercise FEV1 decline values for 11 participants on the vitamin C and placebo days. The individual level differences between the vitamin C and placebo days can thus be calculated for these 11 participants. Similar data is not available for the remaining 9 participants. To include the Cohen study in the meta-analysis, the conservative "no vitamin C effect" was imputed to 9 participants with missing data.

**Imputing "no vitamin C effect" for the 9 participants with missing data**

| Patient                                                                             | Reported FEV1 decline |           | Treatment effect<br>in percentage points | TE |                                                                                                                                                          |
|-------------------------------------------------------------------------------------|-----------------------|-----------|------------------------------------------|----|----------------------------------------------------------------------------------------------------------------------------------------------------------|
|                                                                                     | Placebo day<br>C      | Vit C day |                                          |    |                                                                                                                                                          |
| Reported                                                                            | (%)                   | (%)       |                                          |    |                                                                                                                                                          |
| 1                                                                                   | -26                   | -10       | 16                                       |    | <b>For the 11 participants:</b><br>Mean = 20.36<br>SD = 12.01<br>SE = 3.62<br>t(10 df) = 5.62<br>P(1-tail) = 0.00011                                     |
| 2                                                                                   | -50                   | -5        | 45                                       |    |                                                                                                                                                          |
| 3                                                                                   | -33                   | -5        | 28                                       |    |                                                                                                                                                          |
| 4                                                                                   | -27                   | -9        | 18                                       |    |                                                                                                                                                          |
| 5                                                                                   | -21                   | -3        | 18                                       |    |                                                                                                                                                          |
| 6                                                                                   | -15                   | -6        | 9                                        |    |                                                                                                                                                          |
| 7                                                                                   | -19                   | 0         | 19                                       |    |                                                                                                                                                          |
| 8                                                                                   | -22                   | 16        | 38                                       |    |                                                                                                                                                          |
| 9                                                                                   | -20                   | -4        | 16                                       |    |                                                                                                                                                          |
| 10                                                                                  | -25                   | -15       | 10                                       |    |                                                                                                                                                          |
| 11                                                                                  | -19                   | -12       | 7                                        |    |                                                                                                                                                          |
| <b>Imputed data See below for the imputation of placebo day Imputed "no effect"</b> |                       |           |                                          |    |                                                                                                                                                          |
| 12                                                                                  | -15.9%                | -15.9%    | 0                                        |    | <b>For all the 20 participants:</b><br>Mean = 11.20 >> sheet Fig. 1<br>SD = 13.56 >> sheet Fig. 1<br>SE = 3.03<br>t(19 df) = 3.69<br>P(1-tail) = 0.00077 |
| 13                                                                                  | -20.1%                | -20.1%    | 0                                        |    |                                                                                                                                                          |
| 14                                                                                  | -23.2%                | -23.2%    | 0                                        |    |                                                                                                                                                          |
| 15                                                                                  | -25.8%                | -25.8%    | 0                                        |    |                                                                                                                                                          |
| 16                                                                                  | -28.2%                | -28.2%    | 0                                        |    |                                                                                                                                                          |
| 17                                                                                  | -30.7%                | -30.7%    | 0                                        |    |                                                                                                                                                          |
| 18                                                                                  | -33.3%                | -33.3%    | 0                                        |    |                                                                                                                                                          |
| 19                                                                                  | -36.4%                | -36.4%    | 0                                        |    |                                                                                                                                                          |
| 20                                                                                  | -40.6%                | -40.6%    | 0                                        |    |                                                                                                                                                          |

**Imputation of the placebo-day FEV1 decline value:**

In Table 1, Cohen reported the mean pre- and post-exercise FEV1 values (L) for the placebo day for all 20 participants. The mean FEV1 values for all the 20 participants can be used to calculate the mean FEV1 decline on the placebo day for the 9 participants with missing data. This calculation is done to reach a realistic horizontal spread to Fig. 3 for the 9 participants with the “no vitamin C effect” imputation.

| Participant number    | Before Exercise (L) | After Exercise (L) | Reported Decrease                       |
|-----------------------|---------------------|--------------------|-----------------------------------------|
| 1                     | 1.55                | 1.14               | -26%                                    |
| 2                     | 1.54                | 0.77               | -50%                                    |
| 3                     | 2.22                | 1.48               | -33%                                    |
| 4                     | 1.95                | 1.42               | -27%                                    |
| 5                     | 2.44                | 1.92               | -21%                                    |
| 6                     | 2.04                | 1.75               | -15%                                    |
| 7                     | 2.55                | 2.06               | -19%                                    |
| 8                     | 1.05                | 0.82               | -22%                                    |
| 9                     | 1.10                | 0.88               | -20%                                    |
| 10                    | 3.82                | 2.86               | -25%                                    |
| 11                    | 3.91                | 3.18               | -19%                                    |
| <b>Mean (1-11):</b>   | <b>2.198</b>        | <b>1.661</b>       |                                         |
| <b>Mean (all 20):</b> | <b>2.36</b>         | <b>1.74</b>        |                                         |
|                       |                     |                    | <b>&lt; Cohen Table 1 reported &gt;</b> |
| <b>Mean (12-20):</b>  | <b>2.558</b>        | <b>1.836</b>       |                                         |
|                       |                     |                    | <b>&lt; must have these means &gt;</b>  |
| Imputed               |                     |                    |                                         |
| 12                    |                     |                    |                                         |
| 13                    |                     |                    |                                         |
| 14                    |                     |                    |                                         |
| 15                    |                     |                    |                                         |
| 16                    |                     |                    |                                         |
| 17                    |                     |                    |                                         |
| 18                    |                     |                    |                                         |
| 19                    |                     |                    |                                         |
| 20                    |                     |                    |                                         |

**Cohen Table 2:**  
11 Reported  
**Mean decline for the 11 published = -25.3%**  
SD = 9.6%

Below: these 9 imputed FEV1 decrease values are used in Fig. 3 to show the horizontal spread of the participants with the missing values

| Imputed | P-value |
|---------|---------|
| -15.9%  | 0.9     |
| -20.1%  | 0.8     |
| -23.2%  | 0.7     |
| -25.8%  | 0.6     |
| -28.2%  | 0.5     |
| -30.7%  | 0.4     |
| -33.3%  | 0.3     |
| -36.4%  | 0.2     |
| -40.6%  | 0.1     |

**Thus, the mean decline for the 9 imputed must be = -28.2%**  
( = 1.836 / 2.558 - 1 )

For the imputed 9 cases, the same SD is assumed as observed for the 11 published cases. Generation of the normal distribution with mean = -28.2% and SD = 9.6% for the 9 participants with missing data is done with the help of these equally spaced P-values using the NORMINV function.

1  
2  
3  
4  
5  
6  
7  
8  
9  
10  
11  
12  
13  
14  
15  
16  
17  
18  
19  
20  
21  
22  
23  
24  
25  
26  
27  
28  
29  
30  
31  
32  
33  
34  
35  
36  
37  
38  
39  
40  
41  
42  
43  
44  
45  
46  
47  
48  
49

**Cohen 1997 linear model data**

Table 2, see:  
<http://www.mv.helsinki.fi/home/hemila/A/Cohen.htm>

Here are the accurate data from Table 2 and the imputed values (see the previous sheets) for the linear model

In Fig. 3, TE is modeled with C (Placebo day FEV1 decline) as the explanatory variable

| Placebo day FEV1 |                |                | Vitamin C day FEV1 |                |                | Vitamin C effect on FEV1 decline |
|------------------|----------------|----------------|--------------------|----------------|----------------|----------------------------------|
| Before Exercise  | After Exercise | Difference (%) | Before Exercise    | After Exercise | Difference (%) |                                  |
|                  |                | <b>C</b>       |                    |                |                | <b>TE</b>                        |
| 1.55             | 1.14           | -26.45         | 1.59               | 1.43           | -10.06         | 16.39                            |
| 1.54             | 0.77           | -50.00         | 1.57               | 1.49           | -5.10          | 44.90                            |
| 2.22             | 1.48           | -33.33         | 2.11               | 2.00           | -5.21          | 28.12                            |
| 1.95             | 1.42           | -27.18         | 1.73               | 1.58           | -8.67          | 18.51                            |
| 2.44             | 1.92           | -21.31         | 2.35               | 2.27           | -3.40          | 17.91                            |
| 2.04             | 1.75           | -14.58         | 1.75               | 1.64           | -6.29          | 8.29                             |
| 2.55             | 2.06           | -19.22         | 2.48               | 2.48           | 0.00           | 19.22                            |
| 1.05             | 0.82           | -21.90         | 0.92               | 1.07           | 16.30          | 38.21                            |
| 1.10             | 0.88           | -20.00         | 0.96               | 0.92           | -4.17          | 15.83                            |
| 3.82             | 2.86           | -25.13         | 3.51               | 2.99           | -14.81         | 10.32                            |
| 3.91             | 3.18           | -18.67         | 3.86               | 3.39           | -12.18         | 6.49                             |
| NA               | NA             | -40.60         | NA                 | NA             | -40.6          | 0.00                             |
| NA               | NA             | -36.30         | NA                 | NA             | -36.3          | 0.00                             |
| NA               | NA             | -33.30         | NA                 | NA             | -33.3          | 0.00                             |
| NA               | NA             | -30.70         | NA                 | NA             | -30.7          | 0.00                             |
| NA               | NA             | -28.20         | NA                 | NA             | -28.2          | 0.00                             |
| NA               | NA             | -25.80         | NA                 | NA             | -25.8          | 0.00                             |
| NA               | NA             | -23.20         | NA                 | NA             | -23.2          | 0.00                             |
| NA               | NA             | -20.10         | NA                 | NA             | -20.1          | 0.00                             |
| NA               | NA             | -15.90         | NA                 | NA             | -15.9          | 0.00                             |

**Schachter and Schlesinger 1982**

<http://www.ncbi.nlm.nih.gov/pubmed/7114587>

Tables III and V, see:

<http://www.mv.helsinki.fi/home/hemila/A/Schachter.htm>

Schachter (1982) Table III gives the post-exercise FEV1 decline on the absolute scale (L): A and

Schachter (1982) Table V gives the baseline FEV1 values before exercise (L) on placebo and vitamin C days: B and

Percentage decline in FEV1 is calculated as A/B and D/E

The percentage point effect of vitamin C is calculated as:  $F - C$

In Fig. 2, TE is modeled with C as the explanatory variable

| No.         | Placebo day                          |                                         |                                 | Vitamin C day                        |                                         |                                 | Vitamin C and Placebo<br>Difference<br>in FEV1 decline<br>(in percentage points)<br>Treatment effect (TE) |
|-------------|--------------------------------------|-----------------------------------------|---------------------------------|--------------------------------------|-----------------------------------------|---------------------------------|-----------------------------------------------------------------------------------------------------------|
|             | Change in<br>FEV1<br>(L)<br><b>A</b> | pre-exercise<br>FEV1<br>(L)<br><b>B</b> | Change<br>(%)<br><b>C = A/B</b> | Change in<br>FEV1<br>(L)<br><b>D</b> | pre-exercise<br>FEV1<br>(L)<br><b>E</b> | Change<br>(%)<br><b>F = D/E</b> |                                                                                                           |
| 1           | -0.3                                 | 2.8                                     | -10.71%                         | -0.2                                 | 2.8                                     | -7.14%                          | 3.57%                                                                                                     |
| 2           | -0.7                                 | 2.8                                     | -25.00%                         | -0.4                                 | 3.0                                     | -13.33%                         | 11.67%                                                                                                    |
| 3           | -0.8                                 | 2.2                                     | -36.36%                         | -0.4                                 | 2.0                                     | -20.00%                         | 16.36%                                                                                                    |
| 4           | -0.9                                 | 2.4                                     | -37.50%                         | -0.1                                 | 2.1                                     | -4.76%                          | 32.74%                                                                                                    |
| 5           | 0.0                                  | 2.9                                     | 0.00%                           | 0.0                                  | 2.4                                     | 0.00%                           | 0.00%                                                                                                     |
| 6           | 0.0                                  | 2.8                                     | 0.00%                           | -0.3                                 | 2.7                                     | -11.11%                         | -11.11%                                                                                                   |
| 7           | 0.0                                  | 2.9                                     | 0.00%                           | -0.1                                 | 2.3                                     | -4.35%                          | -4.35%                                                                                                    |
| 8           | -0.1                                 | 2.1                                     | -4.76%                          | 0.0                                  | 1.8                                     | 0.00%                           | 4.76%                                                                                                     |
| 9           | -0.4                                 | 2.7                                     | -14.81%                         | -0.2                                 | 2.5                                     | -8.00%                          | 6.81%                                                                                                     |
| 10          | 0.1                                  | 4.2                                     | 2.38%                           | 0.0                                  | 4.4                                     | 0.00%                           | -2.38%                                                                                                    |
| 11          | -1.4                                 | 2.7                                     | -51.85%                         | -0.7                                 | 2.1                                     | -33.33%                         | 18.52%                                                                                                    |
| 12          | -0.8                                 | 2.5                                     | -32.00%                         | -0.5                                 | 2.5                                     | -20.00%                         | 12.00%                                                                                                    |
| <b>Mean</b> | -0.442                               | 2.750                                   | -17.55%                         | -0.242                               | 2.550                                   | -10.17%                         | <b>7.38%</b>                                                                                              |
| <b>SD</b>   | 0.474                                | 0.528                                   |                                 | 0.223                                | 0.679                                   |                                 | <b>11.83%</b>                                                                                             |
| <b>SE</b>   | 0.137                                | 0.153                                   |                                 | 0.065                                | 0.196                                   |                                 | 3.41%                                                                                                     |

>> sheet Fig.

>> sheet Fig.

1  
2  
3  
4  
5  
6  
7  
8  
9  
10  
11  
12  
13  
14  
15  
16  
17  
18  
19  
20  
21  
22  
23  
24  
25  
26  
27  
28  
29  
30  
31  
32  
33  
34  
35  
36  
37  
38  
39  
40  
41  
42  
43  
44  
45  
46  
47  
48  
49

**Tecklenburg 2007**

<http://www.ncbi.nlm.nih.gov/pubmed/17412579>  
<http://dx.doi.org/10.1016/j.rmed.2007.02.014>

**Post-exercise FEV1 decline caused by exercise**

Text of Sandra Lunds email Jan 7, 2010:  
"Here is the data you requested.  
The average difference score was +6.5 with a standard dev. Of 7.4."

|                      | <b>Percentage<br/>points</b> |                 | <b>Relative effect of vitamin C:<br/>(division by 12.90)</b> |                 |
|----------------------|------------------------------|-----------------|--------------------------------------------------------------|-----------------|
| Mean difference      | <b>6.5</b>                   | >> sheet Fig. 1 | <b>50.4%</b>                                                 | >> sheet Fig. 4 |
| SD(paired)           | <b>7.4</b>                   | >> sheet Fig. 1 | <b>57.4%</b>                                                 | >> sheet Fig. 4 |
| Placebo FEV decline: | 12.90                        |                 | 100%                                                         |                 |



**Fig 1: Meta-analysis of the vitamin C percentage point effect on FEV1 decline caused by exercise**  
**Calculation of the SE adjustment needed for the meta-analysis**

In small studies, the t-score of the t-distribution is used for the calculation of the P and 95%CI, since it takes into account the study  
 In small samples, the 95% limits are calculated as  $\text{Mean} \pm t(P=0.05; df) \times \text{SE}$ . Thus, for small samples, the CI is calculated from "t".  
 The standard meta-analysis programs assume large sample for inverse variance pooling, which means using "z".  
 Therefore the SE(z) value corresponding to the large sample is calculated on the right.  
 In the "metagen" program, this SE(z) value gives a correct CI ranges, those below, in the forest plot of Fig. 1.  
 The correct SE(c) does not give the correct 95%CI limits in the standard meta-analysis programs.

| All data paired  | No of Particip | df | Effect of vitamin C o<br>Reduction in post-exercise<br>FEV1 decline<br>(percentage points) |       | SE(c) | t    | P(2-tail) | t(P=.05;df) | 95% CI |      | SE(z) |
|------------------|----------------|----|--------------------------------------------------------------------------------------------|-------|-------|------|-----------|-------------|--------|------|-------|
|                  |                |    | Mean effect                                                                                | SD    |       |      |           |             | Low    | High |       |
| Tecklenburg 2002 | 8              | 7  | 6.5                                                                                        | 7.4   | 2.62  | 2.48 | 0.0419    | 2.36        | 0.31   | 12.7 | 3.16  |
| Schachter 1982   | 12             | 11 | 7.38                                                                                       | 11.83 | 3.41  | 2.16 | 0.0535    | 2.20        | -0.13  | 14.9 | 3.83  |
| Cohen 1997       | 20             | 19 | 11.20                                                                                      | 13.56 | 3.03  | 3.69 | 0.0015    | 2.09        | 4.85   | 17.5 | 3.24  |

1  
2  
3  
4  
5  
6  
7  
8  
9  
10  
11  
12  
13  
14  
15  
16  
17  
18  
19  
20  
21  
22  
23  
24  
25  
26  
27  
28  
29  
30  
31  
32  
33  
34  
35  
36  
37  
38  
39  
40  
41  
42  
43  
44  
45  
46  
47  
48  
49

**Fig 4: Meta-analysis of the vitamin C relative effect on FEV1 changes caused by exercise**  
Calculation of the SE adjustment needed for the meta-analysis

In small studies, the t-score of the t-distribution is used for the calculation of the P and 95%CI, since it takes into account the study size. In small samples, the 95% limits are calculated as Mean ± t(P=0.05; df) × SE. Thus, for small samples, the CI is calculated from "t". The standard meta-analysis programs assume large sample for inverse variance pooling, which means using "z". Therefore the SE(z) value corresponding to the large sample is calculated on the right. In the "metagen" program, this SE(z) value gives a correct CI ranges, those below, in the forest plot of Fig. 4. The correct SE(c) does not give the correct 95%CI limits in the standard meta-analysis programs.

| All data paired        | No of Particip | df          | Effect of vitamin C on     |      | SE(c) | t    | P(2-tail) | t(P=.05;df) | 95% CI |      | SE(z) |
|------------------------|----------------|-------------|----------------------------|------|-------|------|-----------|-------------|--------|------|-------|
|                        |                |             | Reduction in post-exercise |      |       |      |           |             | Low    | High |       |
|                        |                |             | FEV1 decline               |      |       |      |           |             |        |      |       |
| (relative effect in %) |                | Mean effect | SD                         |      |       |      |           |             |        |      |       |
| Tecklenburg 200        | 8              | 7           | 50.4                       | 57.4 | 20.29 | 2.48 | 0.0420    | 2.36        | 2.41   | 98.4 | 24.48 |
| Schachter 1982         | 12             | 10          | 55.50                      |      | 10.21 | 5.44 | 0.000287  | 2.23        | 32.75  | 78.2 | 11.61 |
| Cohen 1997             | 20             | 19          | 41.78                      |      | 10.56 | 3.96 | 0.000846  | 2.09        | 19.68  | 63.9 | 11.28 |

The mean effect and SE(c) values for Schachter and Cohen studies are from slopes in Figs. 2 and 3, see also Supplementary file. The relative effect mean and SD for the Tecklenburg data are the study mean values, see sheet "Tecklenburg 200".

1  
2  
3 **Supplementary file 3**  
4  
5

6 **Vitamin C may alleviate exercise-induced bronchoconstriction:**  
7 **a meta-analysis**  
8

9  
10 **R-program printouts (3 March 2013)**  
11

12  
13 Harri Hemilä  
14 Department of Public Health  
15 University of Helsinki  
16 Helsinki  
17 Finland  
18 [harri.hemila@helsinki.fi](mailto:harri.hemila@helsinki.fi)  
19 <http://www.mv.helsinki.fi/home/hemila/>  
20  
21  
22

23 **Contents**  
24

25 Page  
26  
27  
28  
29

- 30 2 **Schachter**  
31 Data and the linear model with only the intercept (t-test)  
32 Calculation of the variables is shown in supplementary file 2  
33  
34  
35 3 **Schachter**  
36 Linear model with placebo-day FEV1 decline as the added explanatory variable  
37 Log likelihood test for comparing the two models for the Schachter data  
38  
39  
40 4 **Cohen**  
41 Data and the linear model  
42 Calculation of the variables is shown in supplementary file 2  
43  
44  
45 5 **Fig 1** meta-analysis and sensitivity analysis in which Cohen is excluded  
46  
47  
48 6 **Fig 4** meta-analysis  
49  
50  
51  
52  
53  
54  
55  
56  
57  
58  
59  
60

```

1
2 > Schachter
3   PL_FEV1_Diff VitC_Effect
4   1          -10.71         3.57
5   2          -25.00        11.67
6   3          -36.36        16.36
7   4          -37.50        32.74
8   5           0.00         0.00
9   6           0.00        -11.11
10  7           0.00         -4.35
11  8           -4.76         4.76
12  9          -14.81         6.81
13 10           2.38         -2.38
14 11          -51.85        18.52
15 12          -32.00        12.00
16
17
18
19
20
21 > LinearModel.10 <- lm(VitC_Effect ~ 1,      data=Schachter)
22
23 > summary(LinearModel.10)
24
25 Call:
26 lm(formula = VitC_Effect ~ 1, data = Schachter)
27
28 Residuals:
29     Min       1Q   Median       3Q      Max
30 -18.492  -7.978  -1.597   5.707  25.358
31
32 Coefficients:
33             Estimate Std. Error t value Pr(>|t|)
34 (Intercept)    7.383     3.414   2.162  0.0535
35 ---
36
37 Residual standard error: 11.83 on 11 degrees of freedom
38
39
40 > confint(LinearModel.10)
41             2.5 %    97.5 %
42 (Intercept) -0.1316784 14.89668
43
44
45
46
47
48
49
50
51
52
53
54
55
56
57
58
59
60

```

```
1
2 > LinearModel.11 <- lm(VitC_Effect ~ 1 + PL_FEV1_Diff, data=Schachter)
3
4 > summary(LinearModel.11)
5
6 Call:
7 lm(formula = VitC_Effect ~ 1 + PL_FEV1_Diff, data = Schachter)
8
9 Residuals:
10     Min       1Q   Median       3Q      Max
11  -8.7513  -2.3440   0.0687   1.5644  14.2852
12
13 Coefficients:
14             Estimate Std. Error t value Pr(>|t|)
15 (Intercept)  -2.3587     2.5400  -0.929  0.374966
16 PL_FEV1_Diff -0.5550     0.1021  -5.437  0.000286
17 ---
18
19 Residual standard error: 6.237 on 10 degrees of freedom
20 Multiple R-squared:  0.7472,    Adjusted R-squared:  0.7219
21 F-statistic: 29.56 on 1 and 10 DF,  p-value: 0.0002862
22
23
24 > confint(LinearModel.11)
25             2.5 %      97.5 %
26 (Intercept) -8.0182460  3.3008733
27 PL_FEV1_Diff -0.7825026 -0.3275514
28
29
30
31
32
33
34
35
36 > lrtest(LinearModel.10,LinearModel.11)
37 Likelihood ratio test
38
39 Model 1: VitC_Effect ~ 1
40 Model 2: VitC_Effect ~ 1 + PL_FEV1_Diff
41   #Df  LogLik Df  Chisq Pr(>Chisq)
42   1    2 -46.149
43   2    3 -37.899  1 16.502  4.861e-05
44 ---
45
46
47
48
49
50
51
52
53
54
55
56
57
58
59
60
```

```

1
2 > CohenPubImp
3   PL_FEV1_Diff VitC_Effect
4   1      -26.45      16.39
5   2      -50.00      44.90
6   3      -33.33      28.12
7   4      -27.18      18.51
8   5      -21.31      17.91
9   6      -14.58       8.29
10  7      -19.22      19.22
11  8      -21.90      38.21
12  9      -20.00      15.83
13 10      -25.13      10.32
14 11      -18.67       6.49
15 12      -40.60       0.00
16 13      -36.30       0.00
17 14      -33.30       0.00
18 15      -30.70       0.00
19 16      -28.20       0.00
20 17      -25.80       0.00
21 18      -23.20       0.00
22 19      -20.10       0.00
23 20      -15.90       0.00
24
25
26
27
28
29 > LinearModel.21 <- lm(VitC_Effect ~ 0 + PL_FEV1_Diff, data=CohenPubImp)
30
31 > summary(LinearModel.21)
32
33 Call:
34 lm(formula = VitC_Effect ~ 0 + PL_FEV1_Diff, data = CohenPubImp)
35
36 Residuals:
37     Min       1Q   Median       3Q      Max
38 -16.9609 -11.0288  -0.7439   7.8580  29.0611
39
40
41
42 Coefficients:
43             Estimate Std. Error t value Pr(>|t|)
44 PL_FEV1_Diff  -0.4178     0.1056  -3.955 0.000849
45 ---
46
47 Residual standard error: 13.2 on 19 degrees of freedom
48 Multiple R-squared: 0.4516, Adjusted R-squared: 0.4227
49 F-statistic: 15.64 on 1 and 19 DF, p-value: 0.0008485
50
51
52 > confint(LinearModel.21)
53             2.5 %      97.5 %
54 PL_FEV1_Diff -0.6388209 -0.1966937
55
56
57
58
59
60

```

```

1
2 > Fig_1
3   Mean   SE           Study
4 1  6.50  3.16 Tecklenburg 2007
5 2  7.38  3.83   Schachter 1982
6 3 11.20  3.24           Cohen 1997
7
8 > meta1<-metagen(Fig_1$Mean, Fig_1$SE, Fig_1$Study)
9
10 > meta1
11                                     95%-CI %W(fixed)
12 Tecklenburg 2007  6.50 [ 0.3065; 12.6935]      37.99
13 Schachter 1982   7.38 [-0.1267; 14.8867]      25.86
14 Cohen 1997      11.20 [ 4.8497; 17.5503]      36.14
15
16 Number of studies combined: k=3
17                                     95%-CI      z  p.value
18 Fixed effect model  8.4262 [4.6086; 12.2439] 4.326 < 0.0001
19
20 Quantifying heterogeneity:
21 tau^2 < 0.0001; H = 1 [1; 2.38]; I^2 = 0% [0%; 82.4%]
22
23 Test of heterogeneity:
24   Q d.f.  p.value
25  1.18    2    0.5546
26
27 Details on meta-analytical method:
28 - Inverse variance method
29 - DerSimonian-Laird estimator for tau^2
30
31
32
33
34 > Fig_1_Sens
35   Mean   SE           Study
36 1  6.50  3.16 Tecklenburg 2007
37 2  7.38  3.83   Schachter 1982
38
39 > meta1S<-metagen(Fig_1_Sens$Mean, Fig_1_Sens$SE, Fig_1_Sens$Study)
40
41 > meta1S
42                                     95%-CI %W(fixed)
43 Tecklenburg 2007  6.50 [ 0.3065; 12.6935]      59.5
44 Schachter 1982   7.38 [-0.1267; 14.8867]      40.5
45
46 Number of studies combined: k=2
47
48                                     95%-CI      z  p.value
49 Fixed effect model  6.8564 [2.0791; 11.6338] 2.8129  0.0049
50
51 Quantifying heterogeneity:
52 tau^2 < 0.0001; H = 1; I^2 = 0%
53
54 Test of heterogeneity:
55   Q d.f.  p.value
56  0.03    1    0.8593
57
58 Details on meta-analytical method:
59 - Inverse variance method
60 - DerSimonian-Laird estimator for tau^2

```

```

1
2 > Fig_4
3   Mean    SE      Study
4 1 50.40 24.48 Tecklenburg 2007
5 2 55.50 11.61  Schachter 1982
6 3 41.78 11.28      Cohen 1997
7
8 > meta4<-metagen(Fig_4$Mean, Fig_4$SE, Fig_4$Study)
9
10 > meta4
11                                     95%-CI %W(fixed)
12 Tecklenburg 2007 50.40 [ 2.4201; 98.3799]      9.85
13 Schachter 1982  55.50 [32.7448; 78.2552]     43.78
14 Cohen 1997     41.78 [19.6716; 63.8884]     46.38
15
16 Number of studies combined: k=3
17
18                                     95%-CI      z  p.value
19 Fixed effect model  48.635 [33.5792; 63.6908] 6.3313 < 0.0001
20
21 Quantifying heterogeneity:
22 tau^2 < 0.0001; H = 1 [1; 1.87]; I^2 = 0% [0%; 71.3%]
23
24 Test of heterogeneity:
25   Q d.f.  p.value
26  0.72   2   0.6962
27
28 Details on meta-analytical method:
29 - Inverse variance method
30 - DerSimonian-Laird estimator for tau^2
31
32
33
34
35
36
37
38
39
40
41
42
43
44
45
46
47
48
49
50
51
52
53
54
55
56
57
58
59
60

```



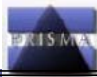

# PRISMA 2009 Checklist

1  
2  
3  
4  
5  
6  
7  
8  
9  
10  
11  
12  
13  
14  
15  
16  
17  
18  
19  
20  
21  
22  
23  
24  
25  
26  
27  
28  
29  
30  
31  
32  
33  
34  
35  
36  
37  
38  
39  
40  
41  
42  
43  
44  
45  
46  
47  
48  
49

| Section/topic                      | #  | Checklist item                                                                                                                                                                                                                                                                                              | Reported on page # |
|------------------------------------|----|-------------------------------------------------------------------------------------------------------------------------------------------------------------------------------------------------------------------------------------------------------------------------------------------------------------|--------------------|
| <b>TITLE</b>                       |    |                                                                                                                                                                                                                                                                                                             |                    |
| Title                              | 1  | Identify the report as a systematic review, meta-analysis, or both.                                                                                                                                                                                                                                         | 1                  |
| <b>ABSTRACT</b>                    |    |                                                                                                                                                                                                                                                                                                             |                    |
| Structured summary                 | 2  | Provide a structured summary including, as applicable: background; objectives; data sources; study eligibility criteria, participants, and interventions; study appraisal and synthesis methods; results; limitations; conclusions and implications of key findings; systematic review registration number. | 2                  |
| <b>INTRODUCTION</b>                |    |                                                                                                                                                                                                                                                                                                             |                    |
| Rationale                          | 3  | Describe the rationale for the review in the context of what is already known.                                                                                                                                                                                                                              | 4                  |
| Objectives                         | 4  | Provide an explicit statement of questions being addressed with reference to participants, interventions, comparisons, outcomes, and study design (PICOS).                                                                                                                                                  | 4-5                |
| <b>METHODS</b>                     |    |                                                                                                                                                                                                                                                                                                             |                    |
| Protocol and registration          | 5  | Indicate if a review protocol exists, if and where it can be accessed (e.g., Web address), and, if available, provide registration information including registration number.                                                                                                                               | no                 |
| Eligibility criteria               | 6  | Specify study characteristics (e.g., PICOS, length of follow-up) and report characteristics (e.g., years considered, language, publication status) used as criteria for eligibility, giving rationale.                                                                                                      | 6                  |
| Information sources                | 7  | Describe all information sources (e.g., databases with dates of coverage, contact with study authors to identify additional studies) in the search and date last searched.                                                                                                                                  | 7                  |
| Search                             | 8  | Present full electronic search strategy for at least one database, including any limits used, such that it could be repeated.                                                                                                                                                                               | 7                  |
| Study selection                    | 9  | State the process for selecting studies (i.e., screening, eligibility, included in systematic review, and, if applicable, included in the meta-analysis).                                                                                                                                                   | 7                  |
| Data collection process            | 10 | Describe method of data extraction from reports (e.g., piloted forms, independently, in duplicate) and any processes for obtaining and confirming data from investigators.                                                                                                                                  | 7                  |
| Data items                         | 11 | List and define all variables for which data were sought (e.g., PICOS, funding sources) and any assumptions and simplifications made.                                                                                                                                                                       | 7-8                |
| Risk of bias in individual studies | 12 | Describe methods used for assessing risk of bias of individual studies (including specification of whether this was done at the study or outcome level), and how this information is to be used in any data synthesis.                                                                                      |                    |
| Summary measures                   | 13 | State the principal summary measures (e.g., risk ratio, difference in means).                                                                                                                                                                                                                               | 6                  |
| Synthesis of results               | 14 | Describe the methods of handling data and combining results of studies, if done, including measures of consistency (e.g., $I^2$ ) for each meta-analysis.                                                                                                                                                   | 8                  |

| Section/topic                                                                                                                              | # | Checklist item | Reported on page # |
|--------------------------------------------------------------------------------------------------------------------------------------------|---|----------------|--------------------|
| For peer review only – <a href="http://bmjopen.bmj.com/site/about/guidelines.xhtml">http://bmjopen.bmj.com/site/about/guidelines.xhtml</a> |   |                |                    |

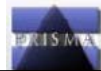

# PRISMA 2009 Checklist

1  
2  
3  
4  
5  
6  
7  
8  
9  
10  
11  
12  
13  
14  
15  
16  
17  
18  
19  
20  
21  
22  
23  
24  
25  
26  
27  
28  
29  
30  
31  
32  
33  
34  
35  
36  
37  
38  
39  
40  
41  
42  
43  
44  
45  
46  
47  
48  
49

|                               |    |                                                                                                                                                                                                          |           |
|-------------------------------|----|----------------------------------------------------------------------------------------------------------------------------------------------------------------------------------------------------------|-----------|
| Risk of bias across studies   | 15 | Specify any assessment of risk of bias that may affect the cumulative evidence (e.g., publication bias, selective reporting within studies).                                                             |           |
| Additional analyses           | 16 | Describe methods of additional analyses (e.g., sensitivity or subgroup analyses, meta-regression), if done, indicating which were pre-specified.                                                         | 7-8       |
| <b>RESULTS</b>                |    |                                                                                                                                                                                                          |           |
| Study selection               | 17 | Give numbers of studies screened, assessed for eligibility, and included in the review, with reasons for exclusions at each stage, ideally with a flow diagram.                                          | 7,9       |
| Study characteristics         | 18 | For each study, present characteristics for which data were extracted (e.g., study size, PICOS, follow-up period) and provide the citations.                                                             | 19        |
| Risk of bias within studies   | 19 | Present data on risk of bias of each study and, if available, any outcome level assessment (see item 12).                                                                                                | 9         |
| Results of individual studies | 20 | For all outcomes considered (benefits or harms), present, for each study: (a) simple summary data for each intervention group (b) effect estimates and confidence intervals, ideally with a forest plot. | 9 (fig 1) |
| Synthesis of results          | 21 | Present results of each meta-analysis done, including confidence intervals and measures of consistency.                                                                                                  | 9         |
| Risk of bias across studies   | 22 | Present results of any assessment of risk of bias across studies (see Item 15).                                                                                                                          | 9-10      |
| Additional analysis           | 23 | Give results of additional analyses, if done (e.g., sensitivity or subgroup analyses, meta-regression [see Item 16]).                                                                                    | 9-10      |
| <b>DISCUSSION</b>             |    |                                                                                                                                                                                                          |           |
| Summary of evidence           | 24 | Summarize the main findings including the strength of evidence for each main outcome; consider their relevance to key groups (e.g., healthcare providers, users, and policy makers).                     | 12        |
| Limitations                   | 25 | Discuss limitations at study and outcome level (e.g., risk of bias), and at review-level (e.g., incomplete retrieval of identified research, reporting bias).                                            | 12        |
| Conclusions                   | 26 | Provide a general interpretation of the results in the context of other evidence, and implications for future research.                                                                                  | 12-14     |
| <b>FUNDING</b>                |    |                                                                                                                                                                                                          |           |
| Funding                       | 27 | Describe sources of funding for the systematic review and other support (e.g., supply of data); role of funders for the systematic review.                                                               | 1         |

From: Moher D, Liberati A, Tetzlaff J, Altman DG, The PRISMA Group (2009). Preferred Reporting Items for Systematic Reviews and Meta-Analyses: The PRISMA Statement. PLoS Med 6(6): e1000097. doi:10.1371/journal.pmed1000097

For more information, visit: [www.prisma-statement.org](http://www.prisma-statement.org).



**Vitamin C may alleviate exercise-induced bronchoconstriction: a meta-analysis**

|                                 |                                                                    |
|---------------------------------|--------------------------------------------------------------------|
| Journal:                        | <i>BMJ Open</i>                                                    |
| Manuscript ID:                  | bmjopen-2012-002416.R2                                             |
| Article Type:                   | Research                                                           |
| Date Submitted by the Author:   | 08-May-2013                                                        |
| Complete List of Authors:       | Hemilä, Harri; University of Helsinki, Department of Public Health |
| <b>Primary Subject Heading</b>: | Respiratory medicine                                               |
| Secondary Subject Heading:      | Sports and exercise medicine, Nutrition and metabolism             |
| Keywords:                       | Asthma < THORACIC MEDICINE, NUTRITION & DIETETICS, SPORTS MEDICINE |
|                                 |                                                                    |

SCHOLARONE™  
Manuscripts

Peer review only

1  
2 Vitamin C may alleviate exercise-induced bronchoconstriction: a meta-analysis  
3  
4

5 Harri Hemilä  
6

7 Department of Public Health, POB 41, University of Helsinki, Helsinki, Finland  
8  
9

10  
11  
12  
13  
14 Harri Hemilä, MD, PhD  
15

16  
17  
18 Department of Public Health,  
19 POB 41, University of Helsinki  
20 Mannerheimintie 172  
21 FIN-00014 Helsinki  
22 Finland  
23 E-mail: harri.hemila@helsinki.fi  
24  
25  
26  
27  
28  
29

30 Words  
31

32  
33 Abstract 296  
34

35 | Text 3505658 (Table 1 included, [Abstract and Fig Legend](#) not included)  
36

37 This research received no specific grant from any funding agency in the public, commercial or not-  
38 for-profit sectors  
39

40 No conflicts of interest  
41  
42  
43  
44

#### 45 ABBREVIATIONS 46

47 CI, confidence interval  
48 EIB, exercise-induced bronchoconstriction  
49 FEV<sub>1</sub>, forced expiratory volume in 1 second  
50 LT, leukotriene  
51 PG, prostaglandin  
52  
53  
54

55  
56 KEY WORDS: anti-asthmatic agents, asthma, exercise-induced asthma, forced expiratory flow  
57 rates, randomized controlled trial  
58  
59  
60

## Abstract

### Objective

To determine whether vitamin C administration influences exercise-induced bronchoconstriction (EIB).

### Design

Systematic review and meta-analysis.

### Methods

MEDLINE and Scopus were searched for placebo-controlled trials on vitamin C and EIB. The primary measures of vitamin C effect used in this study were: 1) the arithmetic difference, and 2) the relative ~~difference~~, effect in the post-exercise FEV<sub>1</sub> decline between the vitamin C and placebo periods. The relative effect of vitamin C administration on FEV<sub>1</sub> was analyzed by using linear modelling for two studies that reported full or partial individual-level data. The arithmetic differences and the relative effects were pooled by the inverse variance method. A secondary measure of the vitamin C effect was the difference in the proportion of participants suffering from EIB on the vitamin C and placebo days.

### Results

Three placebo-controlled trials that studied the effect of vitamin C on EIB were identified. In all they had 40 participants. The pooled effect estimate indicated a reduction of 8.4 percentage points (95%CI: 4.6 to 12.2) in the post-exercise FEV<sub>1</sub> decline when vitamin C was administered before exercise. The pooled relative effect estimate indicated a 48% reduction (95%CI: 33% to 64%) in the post-exercise FEV<sub>1</sub> decline when vitamin C was administered before exercise. One study needed

1  
2 imputations to include it in the meta-analyses, but it also reported that vitamin C decreased the  
3  
4 proportion of participants who suffered from EIB by 50 percentage points (95%CI: 23 to 68); this  
5  
6 comparison did not need data imputations.  
7  
8  
9

## 10 11 **Conclusions**

12  
13 Given the safety and low cost of vitamin C, and the positive findings for vitamin C administration  
14  
15 in the three EIB studies, it seems reasonable for physically active people to test vitamin C when  
16  
17 they have respiratory symptoms such as cough associated with exercise. Further research on the  
18  
19 effects of vitamin C on EIB isare warranted.  
20  
21  
22  
23  
24  
25  
26  
27  
28  
29  
30  
31  
32  
33  
34  
35  
36  
37  
38  
39  
40  
41  
42  
43  
44  
45  
46  
47  
48  
49  
50  
51  
52  
53  
54  
55  
56  
57  
58  
59  
60

## Article summary

### Article focus

- Exercise causes airway narrowing in about 10% of the general population and up to 50% of competitive athletes.
- Laboratory studies have indicated that vitamin C may have an alleviating influence on bronchoconstriction.
- The aim of this [research study](#) was to examine whether vitamin C administration influences FEV<sub>1</sub> decline caused by exercise.

### Key messages

- Vitamin C may alleviate respiratory symptoms caused by exercise.
- In future studies, linear modelling should be used to examine the effect of vitamin C on post-exercise FEV<sub>1</sub> decline instead of calculating the mean effect of vitamin C on post-exercise FEV<sub>1</sub> decline.

### Strengths and limitations

- The included studies were methodologically satisfactory and their results were consistent and close.
- The included studies were small with 40 participants in all.

## Introduction

Exercise-induced bronchoconstriction (EIB) is a transient narrowing of the airways that occurs during or after exercise. Usually, a 10% or greater exercise-induced decline in FEV<sub>1</sub> is classified as EIB.[1] The prevalence of EIB varies from about 10% in the general population, to about 50% in some fields of competitive athletics.[1] The pathophysiology of EIB is not well understood. However, respiratory water loss leads to the release of inflammatory mediators, such as histamine, leukotrienes (LT), and prostaglandins (PG), all of which can cause bronchoconstriction.[1, 2] Increased levels of exhaled nitric oxide have also been associated with EIB.[3]

There is evidence that vitamin C plays a role in lung function. The production of various prostanoids in lung tissues is influenced by vitamin C, and vitamin C deficiency increases the level of bronchoconstrictor PGF<sub>2α</sub>. [4-6] An increase in airway hyperresponsiveness to histamine that was further enhanced by indomethacin administration, was observed in guinea pigs on a diet deficient in vitamin C.[6] In isolated guinea pig trachea smooth muscle, vitamin C decreased the contractions caused by PGF<sub>2α</sub>, histamine, and carbamylcholine.[4, 7, 8] Indomethacin antagonized the effect of vitamin C on chemically-induced bronchoconstriction in humans[9, 10] and the effect of vitamin C on the contractions of guinea pig tracheal muscle.[8] Thus, the effects of vitamin C might be partly mediated by alterations in PG metabolism. In humans, a two-week vitamin C (1.5 g/d) administration regime reduced the post-exercise increase in the urinary markers for the bronchoconstrictors LTC<sub>4</sub>-E<sub>4</sub> and PGD<sub>2</sub>, in addition to reducing the increase of exhaled nitric oxide.[11]

Heavy physical exertion generates oxidative stress, and therefore, as an antioxidant, the effects of vitamin C might be more manifest in people doing exercise.[12, 13] The importance of vitamin C



1  
2 on the respiratory system is also indicated by the decrease in the incidence of the common cold in  
3  
4 people under heavy acute physical stress[14, 15] and by its effects on the severity of the upper and  
5  
6 lower respiratory tract infections.[15-17]  
7  
8  
9

10  
11 Previously, a systematic review examined the effect of vitamin C on exercise-induced  
12  
13 bronchoconstriction.[18] However, there were substantial errors in the extraction of data and data  
14  
15 analysis in that review.[19] The purpose of this systematic review is to examine whether vitamin C  
16  
17 administration influences post-exercise FEV<sub>1</sub> decline.  
18  
19  
20  
21  
22  
23  
24  
25  
26  
27  
28  
29  
30  
31  
32  
33  
34  
35  
36  
37  
38  
39  
40  
41  
42  
43  
44  
45  
46  
47  
48  
49  
50  
51  
52  
53  
54  
55  
56  
57  
58  
59  
60

## Methods

### *Types of studies.*

Controlled trials, both randomised and non-randomised, were included in this systematic review.

Only placebo-controlled blinded trials were included, as the severity of EIB might be affected by the patients' awareness of the treatment. Studies that used children and adults of either gender and any age were considered eligible.

### *Types of interventions.*

The intervention considered was oral or intravenous administration of vitamin C (ascorbic acid or its salts) of at least 0.2 g daily for a single day or for a more extended period. The dose limit was set as a pragmatic choice. When a trial with a low dose gives a negative result, the negative findings can be attributed to that low dosage. Thus, trials with large doses are more critical for testing whether vitamin C is effective at influencing EIB.

### *The outcomes and the measure of the vitamin C effect.*

The primary outcome in this meta-analysis is the relative FEV<sub>1</sub> decline caused by exercise (as a percentage). The measures selected for the vitamin C effect were: 1) the arithmetic difference in the post-exercise decline of FEV<sub>1</sub> between the placebo and vitamin C periods; this is called the percentage point difference, and 2) the relative ~~effect~~ difference in the decline of post-exercise FEV<sub>1</sub> between the vitamin C and placebo periods. A secondary outcome in this meta-analysis was the proportion of participants who suffered from EIB after the exercise test, and the measure of vitamin C effect was taken as the difference in the occurrence in EIB between the vitamin C and placebo days.

1  
2  
3  
4  
5  
6  
7  
8  
9  
10  
11  
12  
13  
14  
15  
16  
17  
18  
19  
20  
21  
22  
23  
24  
25  
26  
27  
28  
29  
30  
31  
32  
33  
34  
35  
36  
37  
38  
39  
40  
41  
42  
43  
44  
45  
46  
47  
48  
49  
50  
51  
52  
53  
54  
55  
56  
57  
58  
59  
60

*Literature searches.*

MEDLINE (OVID) was searched using MESH terms “ascorbic acid” and “exercise-induced asthma”. A similar search was carried out in Scopus. No language restrictions were used. The databases were searched from their inception to February 2013. The reference lists of identified studies and review articles were screened for additional references. See supplementary file 1 for the flow diagram of the literature search.

*Selection of studies and data extraction.*

Five controlled trials that report on vitamin C and EIB were identified. Three of them satisfied the selection criteria (Table I). One of the studies that was not included was not placebo controlled [22] and the other studied the combination of vitamins C and E.[23] The data of the three included trials were extracted and analyzed by this author. The original study authors were contacted when appropriate in order to obtain further data.

Schachter and Schlesinger (1982) reported individual-level FEV<sub>1</sub> measurements for a 12 participant cross-over study.[20] The decline in FEV<sub>1</sub> caused by exercise was calculated in this present study (see supplementary file 2).

Tecklenburg et al. (2007) reported the mean decline in post-exercise FEV<sub>1</sub> for the vitamin C and placebo phases of an 8 participant cross-over study.[11] However, these authors did not report the paired SD value for the mean difference between the two phases. Dr. Tecklenburg was subsequently contacted, and she kindly sent the paired SD value for the mean difference in decline of the post-exercise FEV<sub>1</sub> (see supplementary file 2).

1  
2 Cohen et al. (1997) reported FEV<sub>1</sub> values before and after exercise in only 11 of the 20 participants  
3  
4 of a cross-over study.[21] These 11 had been selected because of the disappearance of EIB during  
5  
6 the study. Thus, the difference in post-exercise FEV<sub>1</sub> decline between the vitamin C and placebo  
7  
8 days can be calculated for these 11 participants (the mean vitamin C effect was a reduction of 20.4  
9  
10 percentage points in the post-exercise decline in FEV<sub>1</sub>). Dr. Cohen was contacted, but he no longer  
11  
12 retained those data. Therefore, to include the Cohen et al. trial in this meta-analysis, the FEV<sub>1</sub>  
13  
14 values for the remaining 9 participants had to be imputed. A conservative "no vitamin C effect"  
15  
16 estimate was imputed for all of the 9 participants with missing data (see supplementary file 2). As a  
17  
18 sensitivity analysis, the Cohen et al. study was excluded from the meta-analysis in Fig. 1 to examine  
19  
20 whether its exclusion influenced the conclusions.  
21  
22  
23  
24  
25  
26

27 Cohen et al. also reported the number of participants who suffered from EIB after the exercise test.  
28  
29 This outcome did not require imputations and it was used as a secondary outcome for comparing the  
30  
31 vitamin C and placebo days in the Cohen study.  
32  
33  
34

### 35 *Statistical analysis.*

36  
37 The statistical heterogeneity of the three studies was assessed by using the  $\chi^2$ -test and the I<sup>2</sup>-  
38  
39 index.[24] The latter examines the percentage of total variation across studies that is due to  
40  
41 heterogeneity between studies rather than by randomness. A value of I<sup>2</sup> greater than about 70%  
42  
43 indicates a high level of heterogeneity. Since the three identified trials showed no statistical  
44  
45 heterogeneity, their results were pooled using the inverse variance method assuming fixed effect by  
46  
47 running the program "metagen" of the R package (see the supplementary file 2 for the details of the  
48  
49 calculations).[25] The program "forest.meta" of the R package was used to construct the forest  
50  
51  
52  
53  
54  
55  
56  
57  
58  
59  
60 plots.

1  
2 To examine the relative effect of vitamin C on post-exercise FEV<sub>1</sub> decline, the vitamin C effect was  
3 modelled using the placebo-day post-exercise FEV<sub>1</sub> decline as the explanatory variable, by using  
4 the linear model "lm" program of the R package.[25] To test whether the addition of the placebo-  
5 day post-exercise FEV<sub>1</sub> decline values significantly improves the linear model fit, the model  
6 containing the placebo-day FEV<sub>1</sub> decline values was compared with the model without them. The  
7 improvement of the model fit was calculated from the change in  $-2 \times \log(\text{likelihood})$ , which  
8 follows the  $\chi^2$  (1 df) distribution.  
9  
10  
11  
12  
13  
14  
15  
16  
17  
18  
19

20 To study the effect of vitamin C on the proportion of participants who suffered from EIB in the  
21 Cohen et al. study, the mid-P value was calculated [26] and the 95% CI was calculated by using the  
22 Agresti-Caffo method.[27]  
23  
24  
25  
26  
27  
28

29 The 2-tailed P-values are presented in this text.  
30  
31  
32  
33  
34  
35  
36  
37  
38  
39  
40  
41  
42  
43  
44  
45  
46  
47  
48  
49  
50  
51  
52  
53  
54  
55  
56  
57  
58  
59  
60

**Table I: Trials on vitamin C supplementation and exercise-induced bronchoconstriction**

| Study [ref.]                      |                   | Descriptions                                                                                                                                                                                                                                                                                                                                                                                                               |
|-----------------------------------|-------------------|----------------------------------------------------------------------------------------------------------------------------------------------------------------------------------------------------------------------------------------------------------------------------------------------------------------------------------------------------------------------------------------------------------------------------|
| Schachter & Schlesinger 1982 [20] | Methods:          | Randomized, double-blind, placebo-controlled, cross-over trial.                                                                                                                                                                                                                                                                                                                                                            |
|                                   | Participants:     | 12 asthmatic subjects, selected from among workers of Yale University in the USA: "all 12 subjects gave a characteristic description of EIB." All included participants had at least 20% reduction in MEF40% after exercise.<br>5 Males, 7 Females; mean age 26 yr (SD 5 yr).                                                                                                                                              |
|                                   | Type of exercise: | Exercise by using a cycloergometer was begun at a constant speed of 20 km/h against a zero workload. At the end of each 1 min interval, the workload was increased by 150 kilopondmeters per min, keeping the pedalling speed constant throughout the experiment. Exercise against progressively larger work loads was continued until either the heart rate reached 170 beats per min or the subject fatigued.            |
|                                   | Intervention:     | On 2 subsequent days, the subjects ingested 0.5 g of vitamin C or sucrose placebo in identical capsules 1.5 h before the exercise. Washout overnight.                                                                                                                                                                                                                                                                      |
|                                   | Outcome:          | Change in FEV <sub>1</sub> was calculated as: [pre-exercise vs. 5 min post-exercise].                                                                                                                                                                                                                                                                                                                                      |
|                                   | Notes:            | See supplementary file 2 for the calculation of the vitamin C effect from the individual-level data.                                                                                                                                                                                                                                                                                                                       |
| Cohen et al. 1997 [21]            | Methods:          | Randomized, double-blind, placebo-controlled, cross-over trial.                                                                                                                                                                                                                                                                                                                                                            |
|                                   | Participants:     | 20 asthmatic subjects in Israel. All of them had demonstrated EIB by having a "decline of at least 15%" in FEV <sub>1</sub> after a standard exercise test.<br>13 Males, 7 Females; mean age 14 yr (range 7 to 28 yr).                                                                                                                                                                                                     |
|                                   | Type of exercise: | A 7-minute exercise session using a motorized treadmill. Each subject exercised to submaximal effort at a speed and slope to provide 80% of the motional oxygen consumption as adjudged by a pulse oximeter.                                                                                                                                                                                                               |
|                                   | Intervention:     | 2 g of vitamin C or placebo 1 hour before the exercise. Washout 1 week.                                                                                                                                                                                                                                                                                                                                                    |
|                                   | Outcomes:         | Change in FEV <sub>1</sub> was calculated as: [pre-exercise vs. 8 min post-exercise].<br>Secondary outcome: proportion of participants who suffered from EIB after the exercise session (decline in FEV <sub>1</sub> at least 15%).                                                                                                                                                                                        |
|                                   | Notes:            | Individual-level data on FEV <sub>1</sub> levels was reported only for 11 of the 20 participants (Cohen's Table 2). Dr. Cohen was contacted, but he no longer had the data. Therefore, a conservative "no vitamin C effect" was imputed for the 9 participants for whom experimental data were not available; see supplementary file 2.                                                                                    |
| Tecklenburg et al. 2007 [11]      | Methods:          | Randomized, double-blind, placebo-controlled, cross-over trial.                                                                                                                                                                                                                                                                                                                                                            |
|                                   | Participants:     | 8 subjects from a population of university students and the local community, Indiana USA, with physician-diagnosed mild to moderate asthma. All subjects had documented EIB as indicated by a "drop greater than 10%" in post-exercise FEV <sub>1</sub> . They also had a history of chest tightness, shortness of breath, and intermittent wheezing following exercise.<br>2 Males, 6 Females; mean age 24.5 yr (SD 5 yr) |
|                                   | Type of exercise: | Subjects ran on a motorized treadmill, elevated by 1% per min until 85% of the age predicted max heart rate and ventilation exceeding 40–60% of predicted max voluntary ventilation. Subjects maintained this exercise intensity for 6 min. Following the 6-min steady state exercise, the grade of the treadmill continued to increase at 1% per min until volitional exhaustion.                                         |
|                                   | Intervention:     | 1.5 g vitamin C or sucrose placebo were administered as capsules matched for color and size daily for 2 weeks. Washout 1 week.<br>Subjects were advised to avoid high vitamin C foods during the study.                                                                                                                                                                                                                    |
|                                   | Outcome:          | Change in FEV <sub>1</sub> was calculated as: [pre-exercise vs. the lowest value within 30 min post-exercise].                                                                                                                                                                                                                                                                                                             |
|                                   | Notes:            | Dr. S. Tecklenburg kindly made the mean and SD for the paired FEV <sub>1</sub> decline available. For the decline in FEV <sub>1</sub> level, the mean difference was +6.5                                                                                                                                                                                                                                                  |

| Study [ref.] |  | Descriptions                                              |
|--------------|--|-----------------------------------------------------------|
|              |  | percentage points (paired SD 7.4) in favour of vitamin C. |

For peer review only

## Results

Three randomized, placebo-controlled, double-blind, cross-over trials that had examined the effect of vitamin C supplementation on the decline in FEV<sub>1</sub> caused by exercise were retrieved. Double-blind means that all studies used allocation concealment, although the term was not used. The experimental conditions were similar (Table 1). The three trials had a total of 40 participants. There was no statistical heterogeneity found between the three studies for the percentage points scale:  $I^2 = 0\%$ ;  $\chi^2(2 \text{ df}) = 1.1$ ,  $P = 0.5$ . Therefore, the pooled percentage point estimate of the vitamin C effect was calculated (Fig. 1). Compared with the placebo phases, the mean reduction in post-exercise FEV<sub>1</sub> decline was 8.4 percentage points during the vitamin C phases (95% CI: 4.6 to 12.2;  $P < 0.0001$ ).

In the Schachter and Schlesinger study, the post-exercise FEV<sub>1</sub> decline was 17.6% for placebo, but only 10.2% for vitamin C (0.5 g single dose), with a 7.4 percentage point (95% CI: -0.1 to 14.95;  $P = 0.054$ ) improvement for the vitamin C treatment.[20] In the Tecklenburg et al. study, the post-exercise FEV<sub>1</sub> decline was 12.9% when on placebo, but only 6.4% when on vitamin C (1.5 g/d for 2 weeks), indicating an improvement of 6.5 percentage points (95% CI: 0.3 to 12.73;  $P = 0.042$ ) for vitamin C.[11] With the conservative imputation of “no vitamin C effect” for 9 participants in the Cohen et al. study, there was a reduction in post-exercise FEV<sub>1</sub> decline by 11.2 percentage points (95% CI: 4.8 to 17.68;  $P = 0.002$ ) on the vitamin C day (2 g single dose).[21]

EIB is not a dichotomous condition; instead there is a continuous variation in the possible level of FEV<sub>1</sub> decline caused by exercise. A single constant percentage point estimate of vitamin C effect for all people who suffer from EIB may thus be simplistic. Instead, it is possible that a relative scale would better capture the effect of vitamin C. Schachter and Schlesinger published individual-level



1  
2 data for all their 12 participants,[20] and thus their data were analyzed using linear modelling to  
3  
4 examine whether the vitamin C effect might depend on the placebo-day post-exercise FEV<sub>1</sub> decline,  
5  
6 i.e., on the baseline severity of EIB (Fig. 2). Adding the placebo-day post-exercise FEV<sub>1</sub> decline  
7  
8 values to the null linear model, which is equivalent to the t-test, improved the ~~statistical~~-model fit by  
9  
10  $\chi^2$  (1 df) = 16.5, corresponding to  $P \leq 0.001005$ . This indicates that the linear model that includes  
11  
12 the placebo-day post-exercise FEV<sub>1</sub> decline explains the effect of vitamin C much better than the  
13  
14 constant 7.4 percentage point effect for all of their participants suffering from EIB. The slope of the  
15  
16 linear model indicates a 55% reduction in the decline of the post-exercise FEV<sub>1</sub> (95% CI: 32% to  
17  
18 78%;  $P \leq 0.00103$ ) for vitamin C administration compared with placebo. Thus, in the percentage  
19  
20 points scale, though there was a trend towards a mean vitamin C effect, the difference between  
21  
22 vitamin C and placebo in the Schachter and Schlesinger trial was not significant ( $P = 0.054$ ),  
23  
24 whereas in the linear model, the slope indicates a highly significant difference between vitamin C  
25  
26 and placebo ( $P \leq 0.00103$ ).  
27  
28  
29  
30  
31  
32

33 Cohen et al. published individual level data for only 11 of their 20 participants (filled squares in Fig.  
34  
35 3).[21] A conservative “no vitamin C effect” was imputed for the remaining 9 participants (open  
36  
37 squares in Fig. 3). Only those participants who had a decline in post-exercise FEV<sub>1</sub> of at least 15%  
38  
39 were included in the Cohen study and therefore the horizontal variation in the Cohen data was  
40  
41 narrow. Fitting the linear regression line through the origin indicates a 42% reduction in post-  
42  
43 exercise FEV<sub>1</sub> decline (95% CI: 19% to 64%) with vitamin C administration.  
44  
45  
46  
47  
48

49 Tecklenburg et al. did not report individual level data for their 8 participants and the data were not  
50  
51 available.[11] The mean values indicate 50.4% (95% CI: 2.4% to 98%) reduction in post-exercise  
52  
53 FEV<sub>1</sub> decline for the vitamin C period.  
54  
55  
56  
57  
58  
59  
60

1  
2 There was no statistical heterogeneity found between the three studies on the relative effect scale:  $I^2$   
3  
4 = 0%;  $\chi^2(2 \text{ df}) = 0.7$ ,  $P = 0.7$ . Therefore, the pooled estimate of the relative vitamin C effect was  
5  
6 calculated for the three trials (Fig. 4). Compared with the placebo phases, vitamin C administration  
7  
8  
9 reduced the post-exercise FEV<sub>1</sub> decline by 48% (95% CI: 33% to 64%;  $P < 0.0001$ ).

10  
11  
12  
13 As a sensitivity test, the Cohen et al. study was excluded from the meta-analysis in Fig. 1. On the  
14  
15 basis of the two remaining trials, the estimate of vitamin C effect on post-exercise FEV<sub>1</sub> decline  
16  
17 became 6.8 percentage points (95% CI: 2.0 to 11.6;  $P = 0.005$ ). Thus, the Cohen et al. study  
18  
19 imputations are not crucial for the conclusion that vitamin C influences post-exercise FEV<sub>1</sub> decline.  
20  
21

22  
23  
24 Finally, although Cohen et al. did not report individual-level data for post-exercise FEV<sub>1</sub> decline  
25  
26 values for 9 of their participants, they reported the presence or absence of EIB (at least 15% decline  
27  
28 in post-exercise FEV<sub>1</sub>) on the vitamin C and placebo days and this dichotomized FEV<sub>1</sub> outcome  
29  
30 does not suffer from missing data. On the placebo day, 100% (20/20) of participants suffered from  
31  
32 EIB, whereas on the vitamin C day, only 50% (10/20) suffered from EIB. This outcome gives 50  
33  
34 percentage point decrease (95% CI: 23 to 68;  $P \leq 0.00021$ ) in the occurrence of EIB following  
35  
36  
37  
38  
39  
40  
41  
42  
43  
44  
45  
46  
47  
48  
49  
50  
51  
52  
53  
54  
55  
56  
57  
58  
59  
60  
vitamin C administration.

## Discussion

In this meta-analysis of three randomized placebo-controlled double-blind trials, vitamin C was found to reduce the post-exercise decline in FEV<sub>1</sub> by a mean of 8.4 percentage points (Fig. 1). Nevertheless, there is a great variation in the level of FEV<sub>1</sub> decline caused by exercise. Therefore it may not be reasonable to assume that a single and constant percentage point estimate of the vitamin C effect is valid for all persons suffering from EIB. Linear modelling of the Schachter and Schlesinger data [20] indicated that it is much better to study the response to vitamin C administration as a relative effect (Fig. 2). However, full individual level data were not available for the other two trials. Nonetheless, all three studies are consistent with vitamin C administration halving the post-exercise decline in FEV<sub>1</sub> (Fig. 4).

The Cohen et al. study [21] required imputations for 9 participants, however, excluding the Cohen et al. study from the percentage point meta-analysis did not influence conclusions. Furthermore, Cohen et al. reported that the number of participants who suffered from EIB dropped from 100% on the placebo day to 50% on the vitamin C day and this outcome did not require imputations, yet the highly significant benefit of vitamin C was seen also in this outcome.

The three studies included in this systematic review indicate that 0.5 to 2 g of vitamin C administration before exercise may have a beneficial effect on many people suffering from EIB. All of the three trials were double-blind placebo-controlled randomized trials ~~so the risk of bias between the trial periods is low~~. The total number of participants in the three trials is only 40. However, ~~a low number of participants is a concern primarily when the results are negative, but less so when the results are statistically highly significant.~~

1  
2  
3  
4  
5  
6  
7  
8  
9  
10  
11  
12  
13  
14  
15  
16  
17  
18  
19  
20  
21  
22  
23  
24  
25  
26  
27  
28  
29  
30  
31  
32  
33  
34  
35  
36  
37  
38  
39  
40  
41  
42  
43  
44  
45  
46  
47  
48  
49  
50  
51  
52  
53  
54  
55  
56  
57  
58  
59  
60

The three trials were carried out in three different decades and on two different continents. The criteria for EIB differed and the mean age of participants was 14 yr in the Cohen study but 25 and 26 years in the two other studies. Still, all the studies found a 50% reduction in the post-exercise FEV<sub>1</sub> decline. It is not evident how far this 50% estimate can be generalized, but the close estimate in such different studies suggests that the estimate may be valid also for several other people who suffer from EIB.

The search, screening and selection for trials, and data extraction were carried out by one person, which may be considered a limitation of this study. In addition, only two data bases were searched, however, in an independent literature search, the Cochrane review on vitamin C and asthma did not identify more trials on vitamin C and EIB.[18] Data analysis was also done by one person, but the supplementary files show the extracted data and data analyses, which makes the study transparent.

~~As to the effect of vitamin C on physically stressed people, a few studies on the common cold have some relevance to the EIB trials. Although vitamin C supplementation had no preventive effect against colds in the general community, administration of vitamin C halved the incidence of colds in five randomized placebo controlled trials that studied subjects under heavy acute physical stress.[14,15] Three of the studies were on marathon runners,[28-30] one study used Canadian soldiers in a northern training exercise,[31] and one study was on schoolchildren in a skiing camp in the Swiss Alps.[32] In the general population, acute cough and sore throat usually indicates a viral etiology. However, such symptoms occurring after a marathon run need not be caused by a viral infection, instead they can result from injury to runners' airways caused by hours of exceptional ventilatory exertion.[2] Thus, the three common cold studies of marathon runners may have been partly measuring the effect of vitamin C on the injury to their airways instead of the effect on viral infections.[33]~~

1  
2  
3  
4  
5  
6  
7  
8  
9 ~~A recent study in Israel found that vitamin C halved the duration of common cold type symptoms in~~  
10 ~~male adolescent competitive swimmers, but no benefit was found in females.[34] Here too, the~~  
11 ~~etiology is unclear and the respiratory symptoms might well have been caused, or partly caused, by~~  
12 ~~non-infectious irritation of swimmers' airways.~~  
13  
14  
15  
16  
17  
18  
19

20 In evidence-based medicine the primary question is whether an intervention has effects on clinically  
21 relevant outcomes, on symptoms and signs such as coughs. With such a perspective, the etiology of  
22 respiratory symptoms is not of prime importance. Thus, in addition to the three EIB trials analyzed  
23 in this systematic review, six common cold studies have reported the benefits of vitamin C  
24 administration for respiratory symptoms of people under heavy physical stress.[14,15,28] Given the  
25 low cost and safety of vitamin C,[15,29,35] and the consistency of positive findings in the three  
26 studies on EIB and the six studies on the common cold, it seems reasonable for physically fit and  
27 active people to test vitamin C on an individual basis if they have respiratory symptoms such as  
28 cough associated with exercise.  
29  
30  
31  
32  
33  
34  
35  
36  
37  
38  
39  
40  
41

42 Promising results in the EIB and common cold studies indicate that further research on vitamin C  
43 and respiratory symptoms of physically active people are warranted. In future trials, statistical  
44 modelling should be used to examine the effect of vitamin C on FEV<sub>1</sub> levels, instead of simply  
45 calculating the percentage point estimates. Although the primary question in the evidence-based  
46 medicine framework is to assess the effectiveness of vitamin C on clinically relevant outcomes, the  
47 etiology of the respiratory symptoms should also be investigated in future investigations.  
48  
49  
50  
51  
52  
53  
54  
55  
56  
57  
58  
59  
60

## Acknowledgements

The author thanks Dr. Tecklenburg who kindly supplied supplementary data for this analysis. The author also thanks Elizabeth Stovold for her contributions to an early version of this manuscript, by helping in the literature searches, considering studies for inclusion, and extracting data for the meta-analysis.

## Legends to Figures

Fig. 1. Percentage point effect of vitamin C on the decline in FEV<sub>1</sub> caused by exercise. The vertical lines indicate the 95% CI for the three trials and the ~~squarebox~~ in the middle of the lines indicates the mean effect of the study. The diamond shape at the bottom indicates the 95% CI for the pooled effect. TE, treatment effect; seTE, standard error of the TE; W, weight of the study.

Fig. 2. The effect of vitamin C on post-exercise FEV<sub>1</sub> decline as a function of the placebo-day post-exercise FEV<sub>1</sub> decline for the Schachter and Schlesinger study.[20] The squares show the 12 participants of the study. The vertical axis shows the difference in post-exercise FEV<sub>1</sub> decline between the vitamin C and the placebo days. The horizontal axis shows the post-exercise FEV<sub>1</sub> decline on the placebo day. The black line indicates the fitted linear regression line. The horizontal dash (-) line indicates the level of identity between vitamin C and placebo. See the supplementary file 2 for the calculations.

Fig. 3. The effect of vitamin C on post-exercise FEV<sub>1</sub> decline as a function of the placebo-day post-exercise FEV<sub>1</sub> decline for the Cohen et al. study.[21] The filled squares show the 11 participants for whom data were reported and the empty squares show the 9 participants to whom the conservative “no vitamin C effect” data were imputed. The vertical axis shows the difference in post-exercise FEV<sub>1</sub> decline between the vitamin C and the placebo days. The horizontal axis shows the post-exercise FEV<sub>1</sub> decline on the placebo day. The black line indicates the fitted linear regression line. The horizontal dash (-) line indicates the level of identity between vitamin C and placebo. The linear regression line was fitted through the origin, since the variation in the placebo-day FEV<sub>1</sub>

1  
2 decline values is narrow. See the supplementary file 2 for the calculations.  
3  
4  
5

6  
7 Fig. 4. Relative effect of vitamin C on the decline in FEV<sub>1</sub> caused by exercise. The vertical lines  
8  
9 indicate the 95% CI for the three trials and the ~~square~~ in the middle of the lines indicates the  
10  
11 mean effect of the study. The diamond shape at the bottom indicates the 95% CI for the pooled  
12  
13 effect. The estimates for the Schachter 1982 and Cohen 1997 studies are based on the slopes of the  
14  
15 linear models in Figs. 3 and 4. The estimates for the Tecklenburg 2007 study are the study mean  
16  
17 estimates. TE, treatment effect; seTE, standard error of the TE; W, weight of the study.  
18  
19  
20  
21  
22  
23  
24  
25  
26  
27  
28  
29  
30  
31  
32  
33  
34  
35  
36  
37  
38  
39  
40  
41  
42  
43  
44  
45  
46  
47  
48  
49  
50  
51  
52  
53  
54  
55  
56  
57  
58  
59  
60



## References

- 1 Weiler JM, Anderson SD, Randolph C. Pathogenesis, prevalence, diagnosis, and management of exercise-induced bronchoconstriction. *Ann Allergy Asthma Immunol* 2010;105(6 Suppl):S1-47. doi:10.1016/j.anai.2010.09.021
- 2 Anderson SD, Kippelen P. Airway injury as a mechanism for exercise-induced bronchoconstriction in elite athletes. *J Allergy Clin Immunol* 2008;122:225-235. doi:10.1016/j.jaci.2008.05.001
- 3 Buchvald F, Hermansen MN, Nielsen KG, et al. Exhaled nitric oxide predicts exercise-induced bronchoconstriction in asthmatic school children. *Chest* 2005;128:1964-1967. doi:10.1378/chest.128.4.1964
- 4 Puglisi L, Berti F, Bosisio E, et al. Ascorbic acid and PGF $2\alpha$  antagonism on tracheal smooth muscle. *Adv Prostaglandin Tromboxane Res* 1976;1:503-506.
- 5 Rothberg KG, Hitchcock M. Effects of ascorbic acid deficiency on the in vitro biosynthesis of cyclooxygenase metabolites in guinea pig lungs. *Prostaglandins Leukot Med* 1983;12:137-147. doi:10.1016/0262-1746(83)90077-X
- 6 Mohsenin V, Tremml PG, Rothberg KG, et al. Airway responsiveness and prostaglandin generation in scorbutic guinea pigs. *Prostaglandins, Leukot Essent Fatty Acids* 1988;33:149-155.
- 7 Zuskin E, Lewis AJ, Bouhuys A. Inhibition of histamine-induced airway constriction by ascorbic acid. *J Allergy Clin Immunol* 1973;51:218-226. doi:10.1016/0091-6749(73)90141-3
- 8 Sipahi E, Ercan ZS. The mechanism of the relaxing effect of ascorbic acid in guinea pig isolated tracheal muscle. *Gen Pharmacol* 1997;28:757-760. doi:10.1016/S0306-3623(96)00277-7
- 9 Ogilvy CS, DuBois AB, Douglas JS. Effects of ascorbic acid and indomethacin on the

- 1  
2  
3  
4  
5  
6  
7  
8  
9  
10  
11  
12  
13  
14  
15  
16  
17  
18  
19  
20  
21  
22  
23  
24  
25  
26  
27  
28  
29  
30  
31  
32  
33  
34  
35  
36  
37  
38  
39  
40  
41  
42  
43  
44  
45  
46  
47  
48  
49  
50  
51  
52  
53  
54  
55  
56  
57  
58  
59  
60
- airways of healthy male subjects with and without induced bronchoconstriction. *J Allergy Clin Immunol* 1981;67:363-369. doi:10.1016/0091-6749(81)90081-6
- 10 Mohsenin V, Dubois AB, Douglas JS. Effect of ascorbic acid on response to methacholine challenge in asthmatic subjects. *Am Rev Respir Dis* 1983;127:143-147.
- 11 Tecklenburg SL, Mickleborough TD, Fly AD, et al. Ascorbic acid supplementation attenuates exercise-induced bronchoconstriction in patients with asthma. *Respir Med* 2007;101:1770-1778. doi:10.1016/j.rmed.2007.02.014
- 12 Powers SK, Jackson MJ. Exercise-induced oxidative stress: cellular mechanisms and impact on muscle force production. *Physiol Rev* 2008;88:1243-76. doi:10.1152/physrev.00031.2007
- 13 Ashton T, Young IS, Peters JR, et. al. Electron spin resonance spectroscopy, exercise, and oxidative stress: an ascorbic acid intervention study. *J Appl Physiol* 1999;87:2032-6.  
<http://www.ncbi.nlm.nih.gov/pubmed/10601146>
- 14 Hemilä H. Vitamin C and common cold incidence: a review of studies with subjects under heavy physical stress. *Int J Sports Med* 1996;17:379-383. doi:10.1055/s-2007-972864  
Available at: <http://hdl.handle.net/10250/7983> (accessed 7 May 2013)
- 15 Hemilä H, Chalker E. Vitamin C for preventing and treating the common cold. *Cochrane Database Syst Rev* 2013;(1):CD000980. doi:10.1002/14651858.CD000980.pub4
- 16 Hemilä H. Vitamin C supplementation and common cold symptoms: problems with inaccurate reviews. *Nutrition* 1996;12:804-809. doi:10.1016/S0899-9007(96)00223-7  
Available at: <http://hdl.handle.net/10250/7979> (accessed 7 May 2013)
- 17 Hemilä H, Louhiala P. Vitamin C may affect lung infections. *J R Soc Med* 2007;100:495-498. doi:10.1258/jrsm.100.11.495
- 18 Kaur B, Rowe BH, Stovold E. Vitamin C supplementation for asthma. *Cochrane Database Syst Rev* 2009;(1):CD000993. doi:10.1002/14651858.CD000993.pub3
- 19 Hemilä H. Feedback. In: Kaur B, Rowe BH, Stovold E. Vitamin C supplementation for

1  
2 asthma. Cochrane Database Syst Rev 2009;(1):CD000993.

3  
4 doi:10.1002/14651858.CD000993.pub3

5  
6 Available at: <http://hdl.handle.net/10138/38500> (accessed 7 May 2013)

7  
8  
9 20 Schachter EN, Schlesinger A. The attenuation of exercise-induced bronchospasm by ascorbic  
10 acid. Ann Allergy 1982;49:146-151.

11  
12 <http://www.ncbi.nlm.nih.gov/pubmed/7114587>

13  
14  
15 21 Cohen HA, Neuman I, Nahum H. Blocking effect of vitamin C in exercise-induced asthma.  
16 Arch Pediatr Adolescent Med 1997;151:367-370.

17  
18 doi:10.1001/archpedi.1997.02170410041005

19  
20  
21 22 Miric M, Haxhiu MA. Effect of vitamin C on exercise-induced bronchoconstriction [Serbo-  
23 Croatian]. Plucne Bolesti 1991;43:94-97.

24  
25 <http://www.ncbi.nlm.nih.gov/pubmed/1766998>

26  
27  
28 23 Murphy JD, Ferguson CS, Brown KR, et al. The effect of dietary antioxidants on lung  
29 function in exercise induced asthma [abstract]. Med Sci Sports Exerc 2002;34(5 Suppl):S155.

30  
31  
32 24 Higgins JPT, Thompson SG, Deeks JJ, et al. Measuring inconsistency in meta-analysis. BMJ  
33 2003;327:557-560. doi:10.1136/bmj.327.7414.557

34  
35  
36  
37 25 The R Project for Statistical Computing. <http://www.r-project.org/> (accessed 7 May 2013)

38  
39  
40 26 Lydersen S, Fagerland MW, Laake P. Recommended tests for association in 2 x 2 tables. Stat  
41 Med 2009;28:1159-75. doi:10.1002/sim.3531

42  
43 <http://www.ncbi.nlm.nih.gov/pubmed/19170020>

44  
45  
46 27 Fagerland MW, Lydersen S, Laake P. Recommended confidence intervals for two independent  
47 binomial proportions. Stat Methods Med Res 2011 (in press).

48  
49 doi:10.1177/0962280211415469

50  
51  
52 ~~28 Peters EM, Goetzsche JM, Grobbelaar B, et al. Vitamin C supplementation reduces the  
53 incidence of post-race symptoms of upper respiratory tract infection in ultramarathon runners.  
54 Am J Clin Nutr 1993;57:170-174.~~

- 1  
2  
3  
4  
5  
6  
7  
8  
9  
10  
11  
12  
13  
14  
15  
16  
17  
18  
19  
20  
21  
22  
23  
24  
25  
26  
27  
28  
29  
30  
31  
32  
33  
34  
35  
36  
37  
38  
39  
40  
41  
42  
43  
44  
45  
46  
47  
48  
49  
50  
51  
52  
53  
54  
55  
56  
57  
58  
59  
60
- ~~29~~ Peters EM, Goetzsche JM, Joseph LE, et al. Vitamin C as effective as combinations of anti-oxidant nutrients in reducing symptoms of upper respiratory tract infection in ultramarathon runners. *S Afr J Sports Med* 1996;11:23-27.
- ~~30~~ Moolla ME. The effect of supplemental anti-oxidants on the incidence and severity of upper respiratory tract infections in ultra-marathon runners [MSc Thesis]. South Africa: University of Cape Town; 1996.
- ~~31~~ Sabiston BH, Radomski MW. Health Problems and Vitamin C in Canadian Northern Military Operations. DCIEM Report no. 74 R-1012. Downsview, Ontario, Canada: Defence and Civil Institute of Environmental Medicine; 1974, 10 pp. Available at: [http://www.mv.helsinki.fi/home/hemila/CC/Sabiston\\_1974\\_ch.pdf](http://www.mv.helsinki.fi/home/hemila/CC/Sabiston_1974_ch.pdf) (accessed 7 Mar 2013)
- ~~32~~ Ritzel G. Critical analysis of the role of vitamin C in the treatment of the common cold [in German]. *Helv Med Acta* 1961;28:63-68. Translation at: <http://www.mv.helsinki.fi/home/hemila/T3.pdf> (accessed 7 Mar 2013)
- ~~33~~ Hemilä H. Vitamin C and exercise induced bronchoconstriction in athletes. *J Allergy Clin Immunol* 2009;123:274-275. doi:10.1016/j.jaci.2008.10.004
- ~~2834~~ Constantini NW, Dubnov-Raz G, Eyal BB, et al. The effect of vitamin C on upper respiratory infections in adolescent swimmers: a randomized trial. *Eur J Pediatr* 2011;170:59-63. doi:10.1007/s00431-010-1270-z
- ~~2935~~ Hathcock JN, Azzi A, Blumberg J, et al. Vitamins E and C are safe across a broad range of intakes. *Am J Clin Nutr* 2005;81:736-745.

1  
2  
3  
4  
5  
6  
7  
8  
9  
10  
11  
12  
13  
14  
15  
16  
17  
18  
19  
20  
21  
22  
23  
24  
25  
26  
27  
28  
29  
30  
31  
32  
33  
34  
35  
36  
37  
38  
39  
40  
41  
42  
43  
44  
45  
46

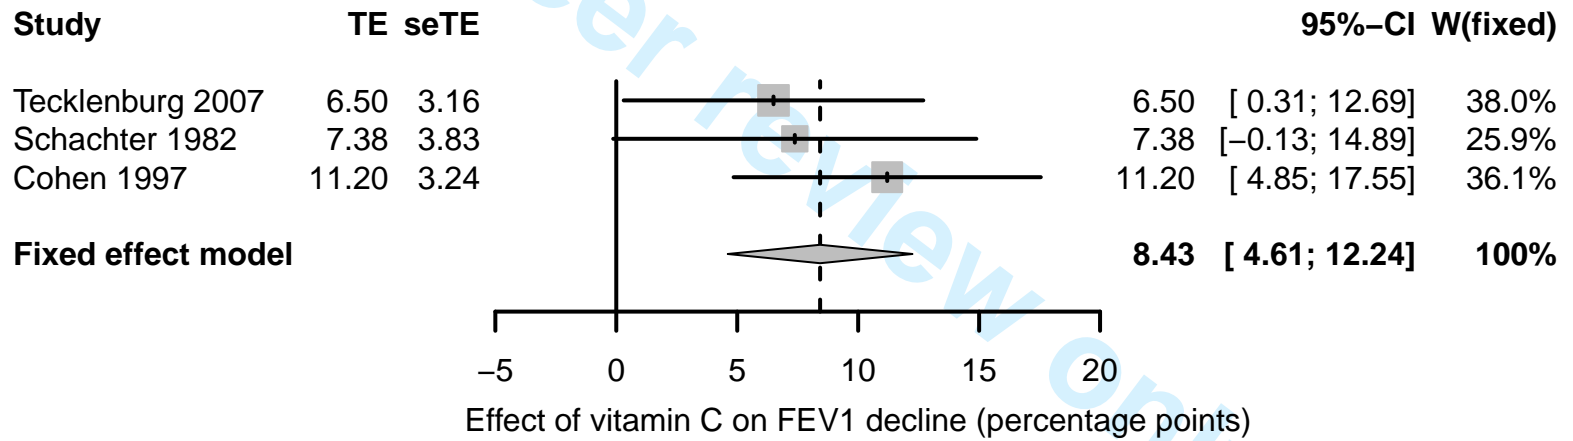

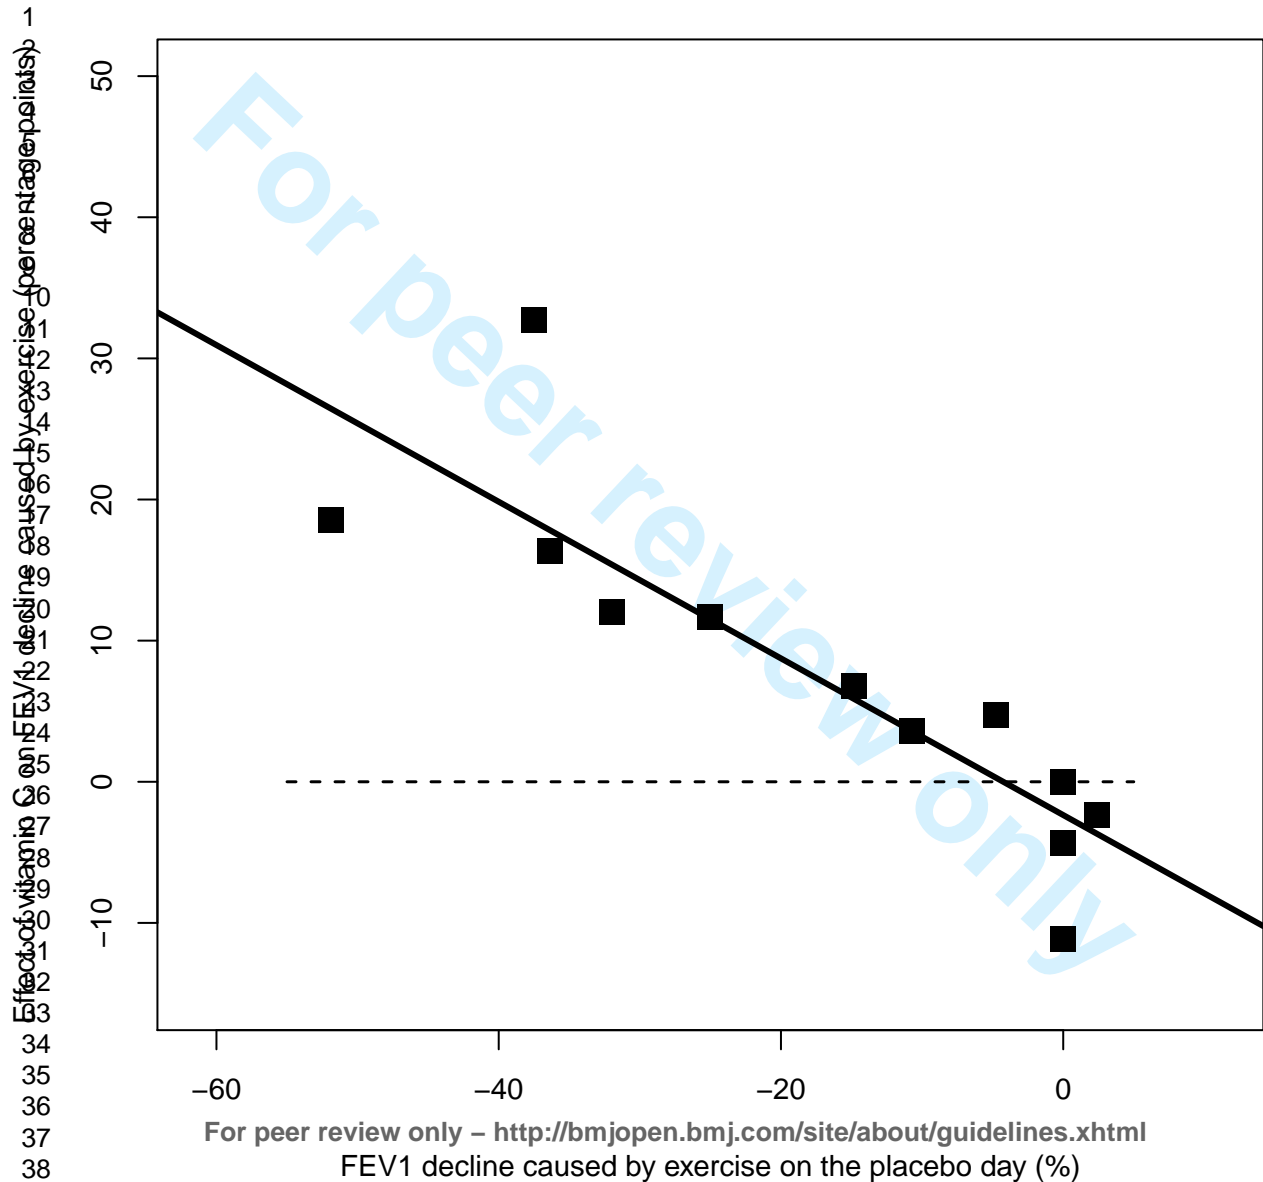

For peer review only – <http://bmjopen.bmj.com/site/about/guidelines.xhtml>

FEV1 decline caused by exercise on the placebo day (%)

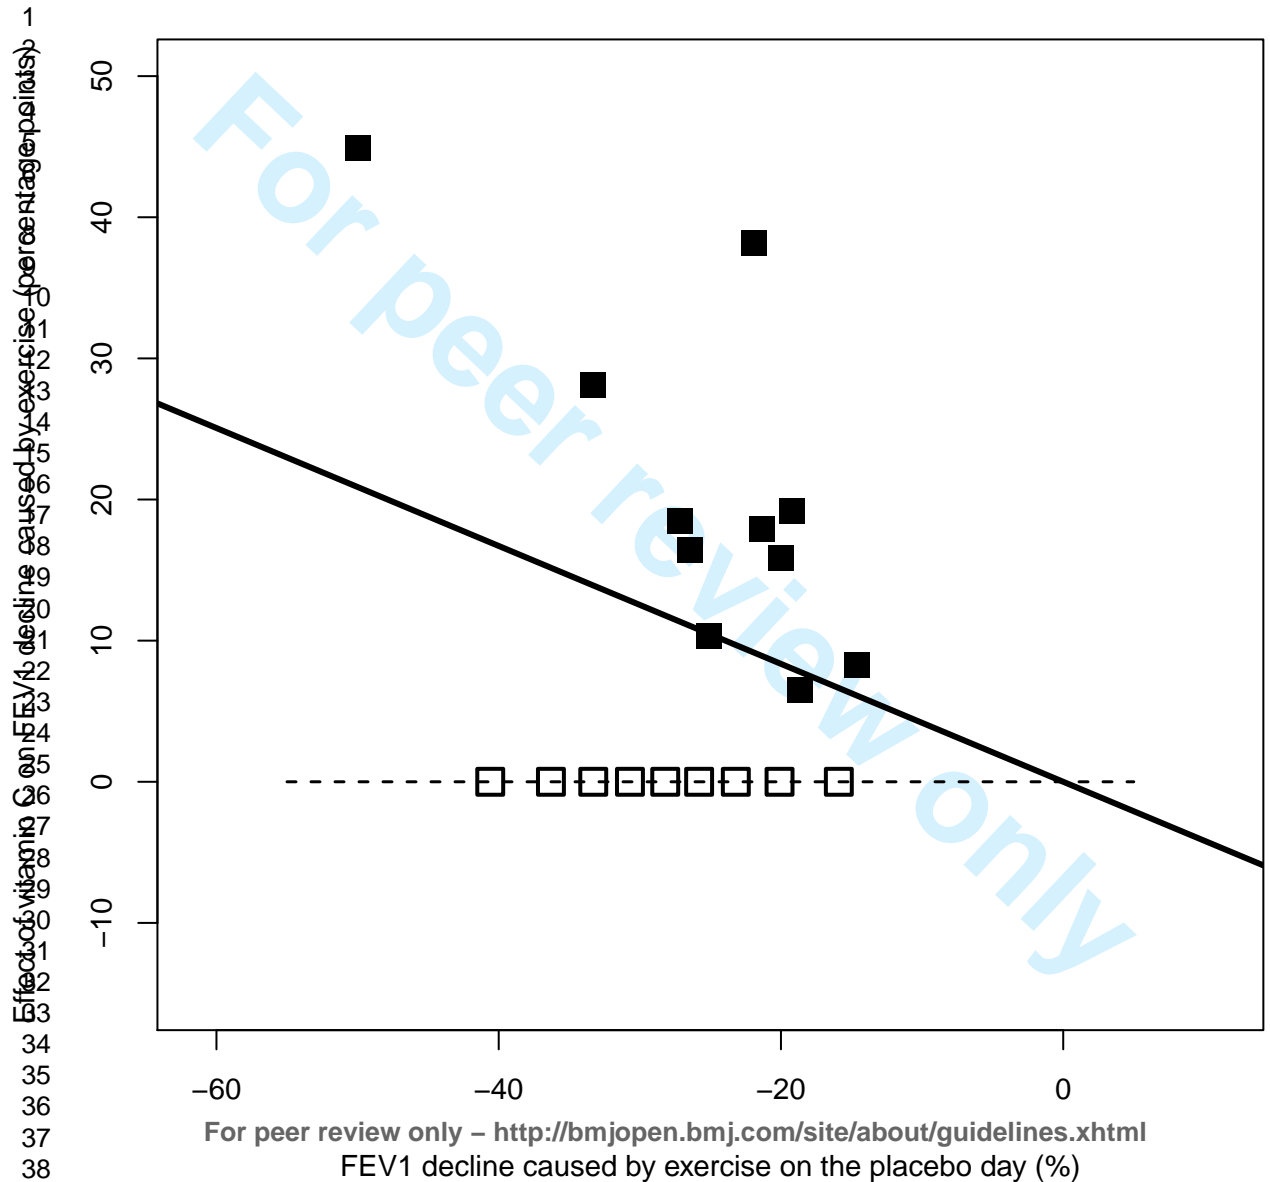

For peer review only – <http://bmjopen.bmj.com/site/about/guidelines.xhtml>

FEV1 decline caused by exercise on the placebo day (%)

1  
2  
3  
4  
5  
6  
7  
8  
9  
10  
11  
12  
13  
14  
15  
16  
17  
18  
19  
20  
21  
22  
23  
24  
25  
26  
27  
28  
29  
30  
31  
32  
33  
34  
35  
36  
37  
38  
39  
40  
41  
42  
43  
44  
45  
46

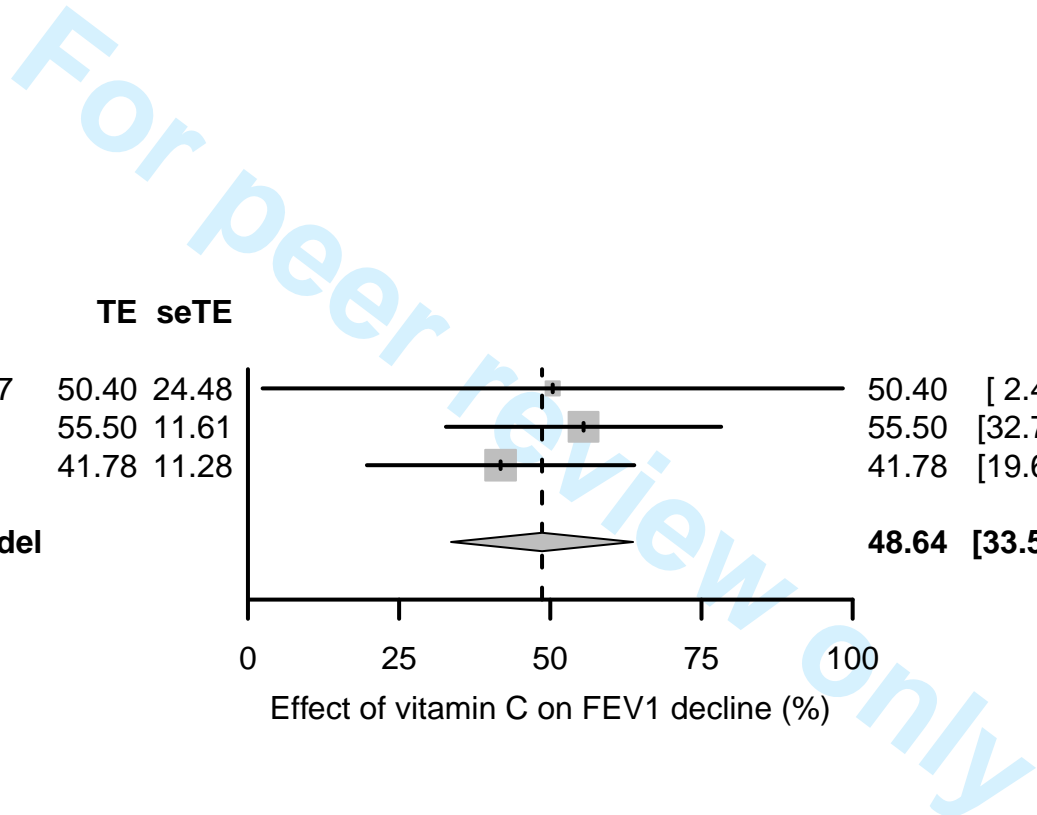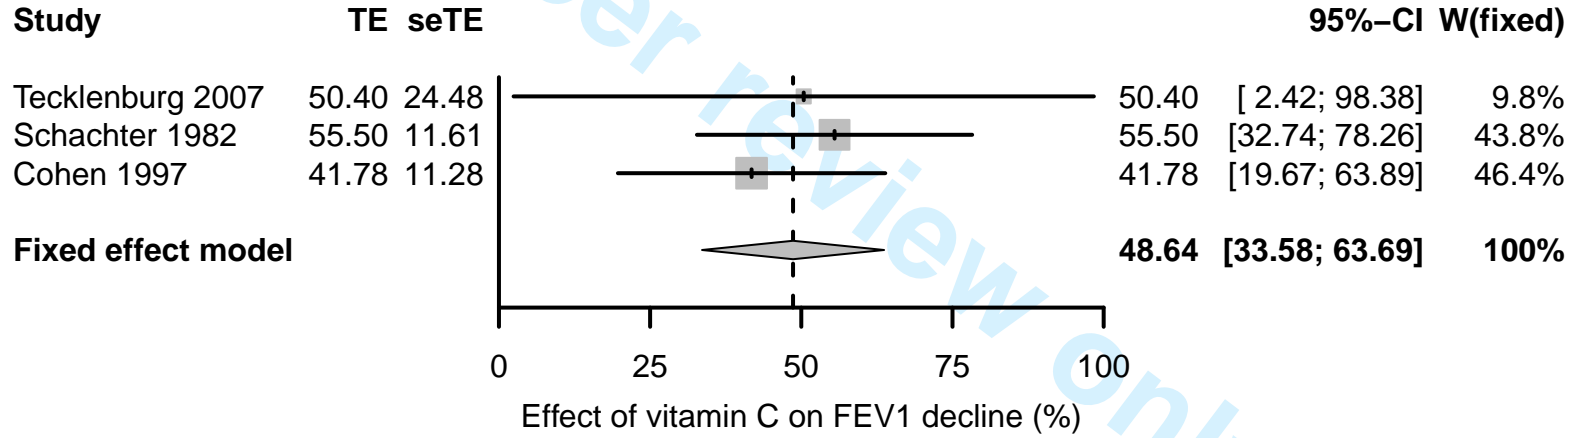



Supplementary file 1

Vitamin C may alleviate exercise-induced bronchoconstriction: a meta-analysis  
Harri Hemilä

Flow diagram of the literature search 12 Feb 2013

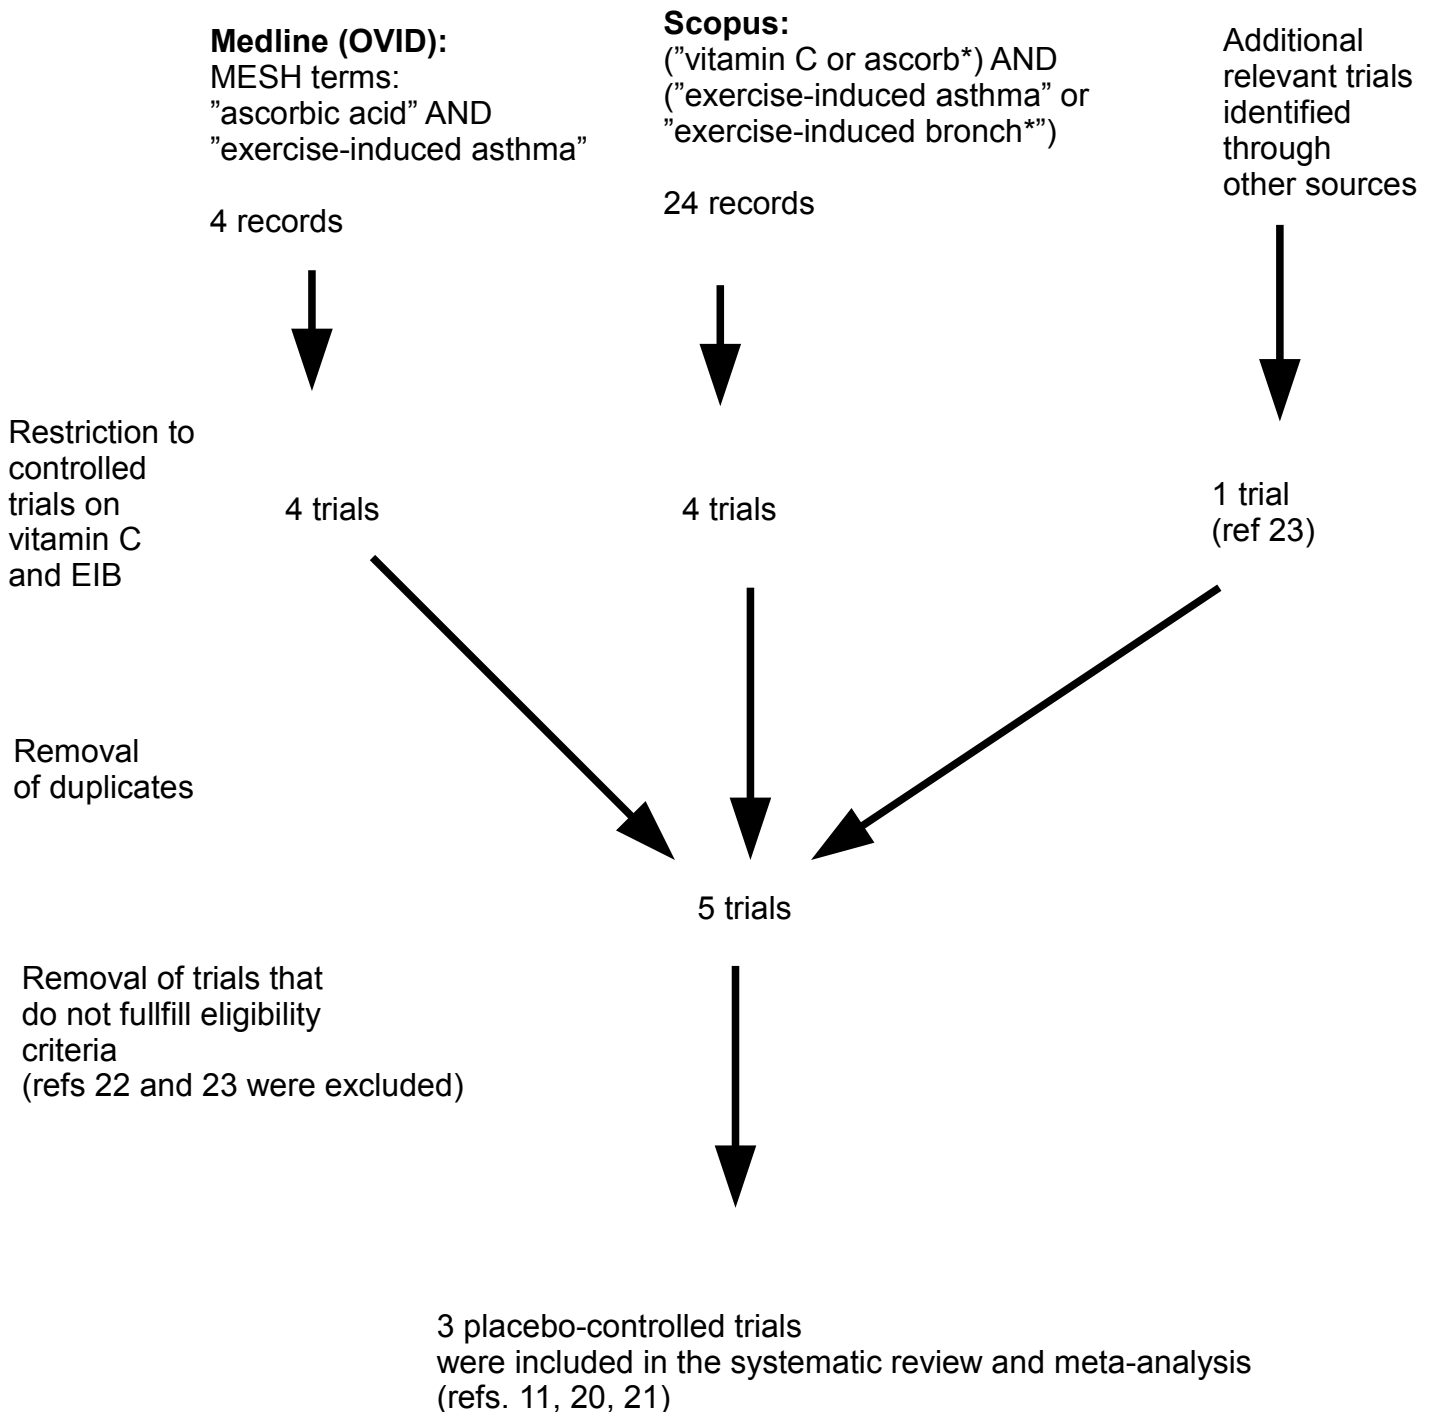

1  
2  
3  
4  
5  
6  
7  
8 **Supplementary file 2**

9  
10 **Vitamin C may alleviate exercise-induced bronchoconstriction: a meta-analysis**

11  
12  
13  
14  
15 Harri Hemilä  
16 Department of Public Health  
17 University of Helsinki  
18 Helsinki  
19 Finland  
20 harri.hemila@helsinki.fi  
21 <http://www.mv.helsinki.fi/home/hemila/>  
22  
23

24  
25 May 7, 2013  
26  
27  
28  
29  
30  
31  
32  
33  
34  
35  
36  
37  
38  
39  
40  
41  
42  
43  
44  
45

Harri Hemilä 2013

**Cohen 1997 2x2** Calculation of the P-value for the vitamin C effect on the occurrence of EIB after exercise session

<http://www.ncbi.nlm.nih.gov/pubmed/9111435>

<http://dx.doi.org/10.1001/archpedi.1997.02170410041005>

Fig 2 data, see:

<http://www.mv.helsinki.fi/home/hemila/A/Cohen.htm>

Cohen studied 20 participants who suffered from EIB, which was the inclusion criterion.

EIB was defined as post-exercise FEV1 decline of "at least 15%".

Cohen reported the number of participants who suffered from EIB after the exercise session on both vitamin C and placebo days.

This secondary outcome does not need any imputations, since there are data for all participants (Cohen's Fig. 2).

The following change to Fig. 2 data was made:

Cohen's Table 2 describes that, on the vitamin C day, patient #10 had post-exercise FEV1 decline of 15% (accurately 14.81%) and should be classified as EIB.

Thus, on the placebo day, all 20 participants suffered from EIB (FEV1 decline "at least 15%") (20-0).

With the above correction, on the vitamin C day, 10 participants suffered from EIB (FEV1 decline "at least 15%") and 10 did not (10-10).

The P-value, and the RR and its 95%CI can be calculated for the effect of vitamin C on the occurrence of EIB after exercise.

There are many ways to calculate P-values for 2x2 tables, see e.g. Lydersen et al.:

<http://www.ncbi.nlm.nih.gov/pubmed/19170020>

The above paper by Lydersen et al shows that the Fisher exact test is too conservative (too large P-values) and the paper strongly discourages its use.

Instead the above paper encourages the use of the mid-P modification of the Fisher test.

For the Cohen 2x2 table (20-0 vs 10-10):

Mid-P(1-tail) = 0.00011

Mid-P(2-tail) = 0.00022

However, mid-P does not take into account that all participants suffered from EIB, which was an inclusion criterion.

If this is taken into account, a still smaller P value is obtained, see bottom of this sheet

That approach gives:

P(1-tail) = 0.00001

P(2-tail) = 0.00002

1  
2  
3  
4  
5  
6  
7  
8  
9  
10  
11  
12  
13  
14  
15  
16  
17  
18  
19  
20  
21  
22  
23  
24  
25  
26  
27  
28  
29  
30  
31  
32  
33  
34  
35  
36  
37  
38  
39  
40  
41  
42  
43  
44  
45  
46  
47  
48  
49

**Calculation of the 95% CI for the Cohen 2x2 table by the Agresti-Caffo -method**

For the calculation formulas, see Fagerland et al. 2011:  
<http://www.ncbi.nlm.nih.gov/pubmed/21996567>

|                      |             |             |                      |               |
|----------------------|-------------|-------------|----------------------|---------------|
|                      | Vit C day   | Placebo day |                      |               |
| EIB cases            | 10          | 20          | Percentage point     |               |
| All participants     | 20          | 20          | Difference           |               |
| Percentage           | 50%         | 100%        | <b>-50%</b>          |               |
| <br>                 |             |             |                      |               |
| <b>Adjusted</b>      | Vit C day   | Placebo day | Vit C day            | Placebo day   |
|                      |             |             | p2                   | p1            |
| EIB cases            | 11          | 21          | p= 0.50              | 0.95          |
| All participants (n) | 22          | 22          | (1-p)= 0.50          | 0.05          |
|                      |             |             | p*(1-p)= 0.25        | 0.04          |
|                      |             |             | p*(1-p)/n= 0.01136   | 0.00197       |
|                      |             |             | sum=                 | 0.0133        |
|                      |             |             | sqrt(sum)=           | 0.115         |
|                      |             |             | p1-p2 =              | -45%          |
|                      |             |             | z(P=0.025) =         | 1.96          |
| <br>                 |             |             |                      |               |
|                      |             |             | <b>Agresti-Caffo</b> | <b>Low</b>    |
| <b>Estimate:</b>     | <b>-50%</b> |             | <b>95% CI:</b>       | <b>-68.1%</b> |
|                      |             |             |                      | <b>High</b>   |
|                      |             |             |                      | <b>-22.8%</b> |

Harri Hemilä 2013

**Calculating a more realistic P-value for the Cohen 2x2 table, taking into account that all participants suffered from EIB**

Given that all of Cohen's participants were selected as EIB cases, the mid-P value is conservative.

The approach below describes a more realistic, but more complex, calculation for the P-value of the observed 20-0 vs 10-10 difference.

Only the mid-P value is reported in the meta-analysis of vitamin C and EIB, but this calculation below shows that the mid-P is conservative.

Some characteristics and diseases are permanent and can be accurately diagnosed, e.g. sex and many genetic diseases.

However, EIB is not permanent nor highly accurate.

Cohen defined EIB as a decline of "at least 15%" in FEV1 because of exercise.

Because of the selection, it is not surprising that all 20 participants had EIB response also on the placebo day.

Nevertheless, this does not mean that the initial EIB diagnosis was 100% accurate and that EIB was a permanent characteristic of the participants.

Let us assume that 95% of the selected participants had EIB on a second exercise test.

If  $P(\text{rediagnosis}) = 0.95$ , then a series of repeated 20 EIB findings on the placebo day is highly probable:

$$P(20 \text{ EIB cases; 1-tail}) = 0.36$$

Nevertheless, such a high probability for a rediagnosis (95%) seems unrealistic.

Let us assume a lower accuracy so that on average 75% of participants had EIB on the second exercise test.

If  $P(\text{rediagnosis}) = 0.75$ , then a series of repeated 20 EIB findings on the placebo day is highly improbable:

$$P(20 \text{ EIB cases; 1-tail}) = 0.003$$

If  $P(\text{rediagnosis})$  is lower than 75%, the probability for observing 20 EIB cases on the placebo day becomes still more and more unlikely.

However, given that all 20 participants were selected as EIB cases, the probability that all of them had EIB on the placebo day cannot be very low.

Between the above extreme values for  $P(\text{rediagnosis})$ , there are values that give reasonable basis for estimating the P- value for the observation 20-0 vs 10-10 .

1  
2  
3  
4  
5  
6  
7  
8  
9  
10  
11  
12  
13  
14  
15  
16  
17  
18  
19  
20  
21  
22  
23  
24  
25  
26  
27  
28  
29  
30  
31  
32  
33  
34  
35  
36  
37  
38  
39  
40  
41  
42  
43  
44  
45  
46  
47  
48  
49

Below, a set of P(rediagnosis) values are selected,  
 and the calculation gives the probability of getting (on the assumption that vitamin C and placebo do not differ):  
 a) the 20 EIB observations on the placebo day  
 b) the 10-10 split on the vitamin C day (with its tail: 9-11 and 8-12 etc.)  
 c) the combined probability for 20-0 and 10-10 on the placebo and vitamin C days, respectively.

| Single person probability for being rediagnosed as an EIB case on a second test | Placebo day<br>Probability for the observation<br>20 EIB + 0 No-EIB | Vit C day<br>Probability for the observation<br>10 EIB + 10 No-EIB |                                                            | For the binomial distribution:<br>No. Participants<br>No. EIB on vit C day |
|---------------------------------------------------------------------------------|---------------------------------------------------------------------|--------------------------------------------------------------------|------------------------------------------------------------|----------------------------------------------------------------------------|
| P(rediagnosis)<br>Pr                                                            | P(plac day, 1-t)<br>[= Pr exp(20)]                                  | P(vitC day, 1-t)<br>Binomial with the tail                         | <b>2 x 2 table</b><br>P(total; 1-tail) = P(plac) * P(vitC) |                                                                            |
| <b>0.95</b>                                                                     | <b>0.36</b>                                                         | 0.00000001                                                         | 0.000000004                                                |                                                                            |
| 0.90                                                                            | 0.12                                                                | 0.000007                                                           | 0.0000009                                                  |                                                                            |
| <b>0.85</b>                                                                     | <b>0.039</b>                                                        | 0.000248                                                           | <b>0.0000096</b>                                           |                                                                            |
| 0.80                                                                            | 0.012                                                               | 0.0026                                                             | 0.000030                                                   |                                                                            |
| <b>0.75</b>                                                                     | <b>0.0032</b>                                                       | 0.014                                                              | <b>0.000044</b>                                            |                                                                            |

Assuming P(rediagnosis) = 0.95 makes the placebo day observation probable, however the vitamin C day observation and the combined observation would be extremely unlikely. Thus, if 0.95 is assumed, then the evidence of vitamin C effect is very strong (very low P)

Assuming P(rediagnosis) = 0.75 makes the vitamin C day observation more likely, however the placebo day observation would become highly unlikely (not reasonable given that all had EIB). Furthermore, a higher P-value for the vitamin C day than for the placebo day is not reasonable (all had EIB) The resulting combined P-value is quite close to the mid-P shown above.

Assuming P(rediagnosis) = 0.85 makes the placebo day observation marginally probable (P = 0.04). Thus, 0.85 is a reasonable assumption. With this assumption, the combined P is a magnitude smaller than the mid-P shown above.

**Cohen 1997 Imputation**

<http://www.ncbi.nlm.nih.gov/pubmed/9111435>

<http://dx.doi.org/10.1001/archpedi.1997.02170410041005>

Table 1 and Table 2, see:

<http://www.mv.helsinki.fi/home/hemila/A/Cohen.htm>

On their Table 2, Cohen reported the post-exercise FEV1 decline values for 11 participants on the vitamin C and placebo days. The individual level differences between the vitamin C and placebo days can thus be calculated for these 11 participants. Similar data is not available for the remaining 9 participants. To include the Cohen study in the meta-analysis, the conservative “no vitamin C effect” was imputed to 9 participants with missing data.

**Imputing “no vitamin C effect” for the 9 participants with missing data**

| Patient             | Reported FEV1 decline                                                    |            | Treatment effect<br>in percentage points | TE |                                                                                                                                                          |
|---------------------|--------------------------------------------------------------------------|------------|------------------------------------------|----|----------------------------------------------------------------------------------------------------------------------------------------------------------|
|                     | Placebo day                                                              | Vit C day  |                                          |    |                                                                                                                                                          |
| <b>Reported</b>     | <b>(%)</b>                                                               | <b>(%)</b> |                                          |    |                                                                                                                                                          |
| 1                   | -26                                                                      | -10        | 16                                       |    | <b>For the 11 participants:</b><br>Mean = 20.36<br>SD = 12.01<br>SE = 3.62<br>t(10 df) = 5.62<br>P(1-tail) = 0.00011                                     |
| 2                   | -50                                                                      | -5         | 45                                       |    |                                                                                                                                                          |
| 3                   | -33                                                                      | -5         | 28                                       |    |                                                                                                                                                          |
| 4                   | -27                                                                      | -9         | 18                                       |    |                                                                                                                                                          |
| 5                   | -21                                                                      | -3         | 18                                       |    |                                                                                                                                                          |
| 6                   | -15                                                                      | -6         | 9                                        |    |                                                                                                                                                          |
| 7                   | -19                                                                      | 0          | 19                                       |    |                                                                                                                                                          |
| 8                   | -22                                                                      | 16         | 38                                       |    |                                                                                                                                                          |
| 9                   | -20                                                                      | -4         | 16                                       |    |                                                                                                                                                          |
| 10                  | -25                                                                      | -15        | 10                                       |    |                                                                                                                                                          |
| 11                  | -19                                                                      | -12        | 7                                        |    |                                                                                                                                                          |
| <b>Imputed data</b> | <b>See below for the imputation of placebo day v Imputed “no effect”</b> |            |                                          |    |                                                                                                                                                          |
| 12                  | -15.9%                                                                   | -15.9%     | 0                                        |    | <b>For all the 20 participants:</b><br>Mean = 11.20 >> sheet Fig. 1<br>SD = 13.56 >> sheet Fig. 1<br>SE = 3.03<br>t(19 df) = 3.69<br>P(1-tail) = 0.00077 |
| 13                  | -20.1%                                                                   | -20.1%     | 0                                        |    |                                                                                                                                                          |
| 14                  | -23.2%                                                                   | -23.2%     | 0                                        |    |                                                                                                                                                          |
| 15                  | -25.8%                                                                   | -25.8%     | 0                                        |    |                                                                                                                                                          |
| 16                  | -28.2%                                                                   | -28.2%     | 0                                        |    |                                                                                                                                                          |
| 17                  | -30.7%                                                                   | -30.7%     | 0                                        |    |                                                                                                                                                          |
| 18                  | -33.3%                                                                   | -33.3%     | 0                                        |    |                                                                                                                                                          |
| 19                  | -36.4%                                                                   | -36.4%     | 0                                        |    |                                                                                                                                                          |
| 20                  | -40.6%                                                                   | -40.6%     | 0                                        |    |                                                                                                                                                          |

1  
2 **Imputation of the placebo-day FEV1 decline value:**

3  
4 In Table 1, Cohen reported the mean pre- and post-exercise FEV1 values (L) for the placebo day for all 20 participants  
5 The mean FEV1 values for all the 20 participants can be used to calculate the mean FEV1 decline on the placebo day for the 9 participants with missing  
6 This calculation is done to reach a realistic horizontal spread to Fig. 3 for the 9 participants with the "no vitamin C effect" imputation

| Participant number  | Before Exercise (L) | After Exercise (L) | Reported Decrease |
|---------------------|---------------------|--------------------|-------------------|
| 1                   | 1.55                | 1.14               | -26%              |
| 2                   | 1.54                | 0.77               | -50%              |
| 3                   | 2.22                | 1.48               | -33%              |
| 4                   | 1.95                | 1.42               | -27%              |
| 5                   | 2.44                | 1.92               | -21%              |
| 6                   | 2.04                | 1.75               | -15%              |
| 7                   | 2.55                | 2.06               | -19%              |
| 8                   | 1.05                | 0.82               | -22%              |
| 9                   | 1.10                | 0.88               | -20%              |
| 10                  | 3.82                | 2.86               | -25%              |
| 11                  | 3.91                | 3.18               | -19%              |
| <b>Mean (1-11):</b> | <b>2.198</b>        | <b>1.661</b>       |                   |

22 **Mean (all 20): 2.36** < Cohen Table 1 reported > **1.74**

25 **Mean (12-20): 2.558**  
26 Imputed  
27 12  
28 13  
29 14  
30 15  
31 16  
32 17  
33 18  
34 19  
35 20

25 **The 9 participants with no data**  
26 < must have these means > **1.836**

27 **Thus, the mean decline**  
28 **for the 9 imputed must be =**  
29 **-28.2%**  
30 **( = 1.836 / 2.558 - 1)**

Below: these 9 imputed FEV1 decrease values are used in Fig. 3 to show the horizontal spread of the participants with the missing values

| Imputed | P-value |
|---------|---------|
| -15.9%  | 0.9     |
| -20.1%  | 0.8     |
| -23.2%  | 0.7     |
| -25.8%  | 0.6     |
| -28.2%  | 0.5     |
| -30.7%  | 0.4     |
| -33.3%  | 0.3     |
| -36.4%  | 0.2     |
| -40.6%  | 0.1     |

For the imputed 9 cases, the same SD is assumed as observed for the 11 published cases. Generation of the normal distribution with mean = -28.2% and SD = 9.6% for the 9 participants with missing data is done with the help of these equally P-values using the NORMINV function.



Harri Hemilä 2013

**Cohen 1997 linear model data**

Table 2, see:

<http://www.mv.helsinki.fi/home/hemila/A/Cohen.htm>

Here are the accurate data from Table 2 and the imputed values (see the previous sheets) for the linear model

**In Fig. 3, TE is modeled with C (Placebo day FEV1 decline) as the explanatory variable**

| Placebo day FEV1   |                   |                   | Vitamin C day FEV1 |                   |                   | Vitamin C<br>effect on<br>FEV1 decline |
|--------------------|-------------------|-------------------|--------------------|-------------------|-------------------|----------------------------------------|
| Before<br>Exercise | After<br>Exercise | Difference<br>(%) | Before<br>Exercise | After<br>Exercise | Difference<br>(%) |                                        |
|                    |                   | <b>C</b>          |                    |                   |                   | <b>TE</b>                              |
| 1.55               | 1.14              | -26.45            | 1.59               | 1.43              | -10.06            | 16.39                                  |
| 1.54               | 0.77              | -50.00            | 1.57               | 1.49              | -5.10             | 44.90                                  |
| 2.22               | 1.48              | -33.33            | 2.11               | 2.00              | -5.21             | 28.12                                  |
| 1.95               | 1.42              | -27.18            | 1.73               | 1.58              | -8.67             | 18.51                                  |
| 2.44               | 1.92              | -21.31            | 2.35               | 2.27              | -3.40             | 17.91                                  |
| 2.04               | 1.75              | -14.58            | 1.75               | 1.64              | -6.29             | 8.29                                   |
| 2.55               | 2.06              | -19.22            | 2.48               | 2.48              | 0.00              | 19.22                                  |
| 1.05               | 0.82              | -21.90            | 0.92               | 1.07              | 16.30             | 38.21                                  |
| 1.10               | 0.88              | -20.00            | 0.96               | 0.92              | -4.17             | 15.83                                  |
| 3.82               | 2.86              | -25.13            | 3.51               | 2.99              | -14.81            | 10.32                                  |
| 3.91               | 3.18              | -18.67            | 3.86               | 3.39              | -12.18            | 6.49                                   |
| NA                 | NA                | -40.60            | NA                 | NA                | -40.6             | 0.00                                   |
| NA                 | NA                | -36.30            | NA                 | NA                | -36.3             | 0.00                                   |
| NA                 | NA                | -33.30            | NA                 | NA                | -33.3             | 0.00                                   |
| NA                 | NA                | -30.70            | NA                 | NA                | -30.7             | 0.00                                   |
| NA                 | NA                | -28.20            | NA                 | NA                | -28.2             | 0.00                                   |
| NA                 | NA                | -25.80            | NA                 | NA                | -25.8             | 0.00                                   |
| NA                 | NA                | -23.20            | NA                 | NA                | -23.2             | 0.00                                   |
| NA                 | NA                | -20.10            | NA                 | NA                | -20.1             | 0.00                                   |
| NA                 | NA                | -15.90            | NA                 | NA                | -15.9             | 0.00                                   |

1  
2  
3  
4  
5  
6  
7  
8  
9  
10  
11  
12  
13  
14  
15  
16  
17  
18  
19  
20  
21  
22  
23  
24  
25  
26  
27  
28  
29  
30  
31  
32  
33  
34  
35  
36  
37  
38  
39  
40  
41  
42  
43  
44  
45  
46  
47  
48  
49

**Schachter and Schlesinger 1982**

<http://www.ncbi.nlm.nih.gov/pubmed/7114587>

Tables III and V, see:

<http://www.mv.helsinki.fi/home/hemila/A/Schachter.htm>

Schachter (1982) Table III gives the post-exercise FEV1 decline on the absolute scale (L): A and

Schachter (1982) Table V gives the baseline FEV1 values before exercise (L) on placebo and vitamin C days: B and

Percentage decline in FEV1 is calculated as A/B and D/E

The percentage point effect of vitamin C is calculated as: F – C

In Fig. 2, TE is modeled with C as the explanatory variable

| No.         | Placebo day                    |                                   |                              | Vitamin C day                  |                                   |                              | Vitamin C and Placebo Difference<br>in FEV1 decline<br>(in percentage points)<br>Treatment effect (TE) |
|-------------|--------------------------------|-----------------------------------|------------------------------|--------------------------------|-----------------------------------|------------------------------|--------------------------------------------------------------------------------------------------------|
|             | Change in FEV1 (L)<br><b>A</b> | pre-exercise FEV1 (L)<br><b>B</b> | Change (%)<br><b>C = A/B</b> | Change in FEV1 (L)<br><b>D</b> | pre-exercise FEV1 (L)<br><b>E</b> | Change (%)<br><b>F = D/E</b> |                                                                                                        |
| 1           | -0.3                           | 2.8                               | -10.71%                      | -0.2                           | 2.8                               | -7.14%                       | 3.57%                                                                                                  |
| 2           | -0.7                           | 2.8                               | -25.00%                      | -0.4                           | 3.0                               | -13.33%                      | 11.67%                                                                                                 |
| 3           | -0.8                           | 2.2                               | -36.36%                      | -0.4                           | 2.0                               | -20.00%                      | 16.36%                                                                                                 |
| 4           | -0.9                           | 2.4                               | -37.50%                      | -0.1                           | 2.1                               | -4.76%                       | 32.74%                                                                                                 |
| 5           | 0.0                            | 2.9                               | 0.00%                        | 0.0                            | 2.4                               | 0.00%                        | 0.00%                                                                                                  |
| 6           | 0.0                            | 2.8                               | 0.00%                        | -0.3                           | 2.7                               | -11.11%                      | -11.11%                                                                                                |
| 7           | 0.0                            | 2.9                               | 0.00%                        | -0.1                           | 2.3                               | -4.35%                       | -4.35%                                                                                                 |
| 8           | -0.1                           | 2.1                               | -4.76%                       | 0.0                            | 1.8                               | 0.00%                        | 4.76%                                                                                                  |
| 9           | -0.4                           | 2.7                               | -14.81%                      | -0.2                           | 2.5                               | -8.00%                       | 6.81%                                                                                                  |
| 10          | 0.1                            | 4.2                               | 2.38%                        | 0.0                            | 4.4                               | 0.00%                        | -2.38%                                                                                                 |
| 11          | -1.4                           | 2.7                               | -51.85%                      | -0.7                           | 2.1                               | -33.33%                      | 18.52%                                                                                                 |
| 12          | -0.8                           | 2.5                               | -32.00%                      | -0.5                           | 2.5                               | -20.00%                      | 12.00%                                                                                                 |
| <b>Mean</b> | -0.442                         | 2.750                             | -17.55%                      | -0.242                         | 2.550                             | -10.17%                      | <b>7.38%</b>                                                                                           |
| <b>SD</b>   | 0.474                          | 0.528                             |                              | 0.223                          | 0.679                             |                              | <b>11.83%</b>                                                                                          |
| <b>SE</b>   | 0.137                          | 0.153                             |                              | 0.065                          | 0.196                             |                              | 3.41%                                                                                                  |

>> sheet Fig.

>> sheet Fig.

Harri Hemilä 2013

**Tecklenburg 2007**<http://www.ncbi.nlm.nih.gov/pubmed/17412579><http://dx.doi.org/10.1016/j.rmed.2007.02.014>**Post-exercise FEV1 decline caused by exercise**

Text of Sandra Lunds email Jan 7, 2010:

"Here is the data you requested.  
The average difference score was +6.5 with a standard dev. Of 7.4."

|                      | Percentage<br>points | Relative effect of vitamin C:<br>(division by 12.90) |
|----------------------|----------------------|------------------------------------------------------|
| Mean difference      | 6.5 >> sheet Fig. 1  | 50.39% >> sheet Fig. 4                               |
| SD(paired)           | 7.4 >> sheet Fig. 1  | 57.36% >> sheet Fig. 4                               |
| Placebo FEV decline: | 12.90                | 100%                                                 |

1  
2  
3  
4  
5  
6  
7  
8  
9  
10  
11  
12  
13  
14  
15  
16  
17  
18  
19  
20  
21  
22  
23  
24  
25  
26  
27  
28  
29  
30  
31  
32  
33  
34  
35  
36  
37  
38  
39  
40  
41  
42  
43  
44  
45  
46  
47  
48  
49

**Fig 1: Meta-analysis of the vitamin C percentage point effect on FEV1 decline caused by exercise**  
**Calculation of the SE adjustment needed for the meta-analysis**

In small studies, the t-score of the t-distribution is used for the calculation of the P and 95%CI, since it takes into account the study :  
In small samples, the 95% limits are calculated as Mean ± t(P=0.05; df) × SE. Thus, for small samples, the CI is calculated from "t".  
The standard meta-analysis programs assume large sample for inverse variance pooling, which means using "z".  
Therefore the SE(z) value corresponding to the large sample is calculated on the right.  
In the "metagen" program, this SE(z) value gives a correct CI ranges, those below, in the forest plot of Fig. 1.  
The correct SE(c) does not give the correct 95%CI limits in the standard meta-analysis programs.

|                  |                   | Effect of vitamin C on<br>Reduction in post-exercise<br>FEV1 decline<br>(percentage points) |                |       |       |      |           |             |        |      |       |
|------------------|-------------------|---------------------------------------------------------------------------------------------|----------------|-------|-------|------|-----------|-------------|--------|------|-------|
| All data paired  | No of<br>Particip | df                                                                                          | Mean<br>effect | SD    | SE(c) | t    | P(2-tail) | :(P=.05;df) | 95% CI |      | SE(z) |
|                  |                   |                                                                                             |                |       |       |      |           |             | Low    | High |       |
| Tecklenburg 2002 | 8                 | 7                                                                                           | 6.5            | 7.4   | 2.62  | 2.48 | 0.0419    | 2.36        | 0.31   | 12.7 | 3.16  |
| Schachter 1982   | 12                | 11                                                                                          | 7.38           | 11.83 | 3.41  | 2.16 | 0.0535    | 2.20        | -0.13  | 14.9 | 3.83  |
| Cohen 1997       | 20                | 19                                                                                          | 11.20          | 13.56 | 3.03  | 3.69 | 0.0015    | 2.09        | 4.85   | 17.5 | 3.24  |

**Fig 4: Meta-analysis of the vitamin C relative effect on FEV1 changes caused by exercise**  
**Calculation of the SE adjustment needed for the meta-analysis**

In small studies, the t-score of the t-distribution is used for the calculation of the P and 95%CI, since it takes into account the study. In small samples, the 95% limits are calculated as  $\text{Mean} \pm t(P=0.05; df) \times \text{SE}$ . Thus, for small samples, the CI is calculated from "t". The standard meta-analysis programs assume large sample for inverse variance pooling, which means using "z". Therefore the SE(z) value corresponding to the large sample is calculated on the right. In the "metagen" program, this SE(z) value gives a correct CI ranges, those below, in the forest plot of Fig. 4. The correct SE(c) does not give the correct 95%CI limits in the standard meta-analysis programs.

| All data paired  | No of Particip | df | Effect of vitamin C on              |       | SE(c) | t    | P(2-tail) | t(P=.05;df) | 95% CI |      | SE(z) |
|------------------|----------------|----|-------------------------------------|-------|-------|------|-----------|-------------|--------|------|-------|
|                  |                |    | Reduction in post-exercise          |       |       |      |           |             | Low    | High |       |
|                  |                |    | FEV1 decline (relative effect in %) |       |       |      |           |             |        |      |       |
| Mean effect      | SD             |    |                                     |       |       |      |           |             |        |      |       |
| Tecklenburg 2001 | 8              | 7  | 50.39                               | 57.36 | 20.28 | 2.48 | 0.0419    | 2.36        | 2.44   | 98.3 | 24.47 |
| Schachter 1982   | 12             | 10 | 55.50                               |       | 10.21 | 5.44 | 0.000287  | 2.23        | 32.75  | 78.2 | 11.61 |
| Cohen 1997       | 20             | 19 | 41.78                               |       | 10.56 | 3.96 | 0.000846  | 2.09        | 19.68  | 63.9 | 11.28 |

The mean effect and SE(c) values for Schachter and Cohen studies are from slopes in Figs. 2 and 3, see also Supplementary file. The relative effect mean and SD for the Tecklenburg data are the study mean values, see sheet "Tecklenburg 2001".

1  
2  
3 **Supplementary file 3**  
4  
5

6 **Vitamin C may alleviate exercise-induced bronchoconstriction:**  
7 **a meta-analysis**  
8  
9

10 **R-program printouts (3 March 2013)**  
11

12  
13 Harri Hemilä  
14 Department of Public Health  
15 University of Helsinki  
16 Helsinki  
17 Finland  
18 [harri.hemila@helsinki.fi](mailto:harri.hemila@helsinki.fi)  
19 <http://www.mv.helsinki.fi/home/hemila/>  
20  
21  
22

23 **Contents**  
24

25 Page  
26  
27  
28  
29

- 30 2 **Schachter**  
31 Data and the linear model with only the intercept (t-test)  
32 Calculation of the variables is shown in supplementary file 2  
33  
34  
35 3 **Schachter**  
36 Linear model with placebo-day FEV1 decline as the added explanatory variable  
37 Log likelihood test for comparing the two models for the Schachter data  
38  
39  
40 4 **Cohen**  
41 Data and the linear model  
42 Calculation of the variables is shown in supplementary file 2  
43  
44  
45 5 **Fig 1** meta-analysis and sensitivity analysis in which Cohen is excluded  
46  
47  
48 6 **Fig 4** meta-analysis  
49  
50  
51  
52  
53  
54  
55  
56  
57  
58  
59  
60

```

1
2 > Schachter
3   PL_FEV1_Diff VitC_Effect
4   1      -10.71      3.57
5   2      -25.00     11.67
6   3      -36.36     16.36
7   4      -37.50     32.74
8   5       0.00      0.00
9   6       0.00    -11.11
10  7       0.00     -4.35
11  8      -4.76      4.76
12  9     -14.81      6.81
13 10       2.38     -2.38
14 11     -51.85     18.52
15 12     -32.00     12.00
16
17
18
19
20
21 > LinearModel.10 <- lm(VitC_Effect ~ 1,      data=Schachter)
22
23 > summary(LinearModel.10)
24
25 Call:
26 lm(formula = VitC_Effect ~ 1, data = Schachter)
27
28 Residuals:
29      Min       1Q   Median       3Q      Max
30 -18.492  -7.978  -1.597   5.707  25.358
31
32 Coefficients:
33             Estimate Std. Error t value Pr(>|t|)
34 (Intercept)    7.383     3.414   2.162  0.0535
35 ---
36
37 Residual standard error: 11.83 on 11 degrees of freedom
38
39
40 > confint(LinearModel.10)
41             2.5 %    97.5 %
42 (Intercept) -0.1316784 14.89668
43
44
45
46
47
48
49
50
51
52
53
54
55
56
57
58
59
60

```

```
1
2 > LinearModel.11 <- lm(VitC_Effect ~ 1 + PL_FEV1_Diff, data=Schachter)
3
4 > summary(LinearModel.11)
5
6 Call:
7 lm(formula = VitC_Effect ~ 1 + PL_FEV1_Diff, data = Schachter)
8
9 Residuals:
10     Min       1Q   Median       3Q      Max
11 -8.7513 -2.3440  0.0687  1.5644 14.2852
12
13 Coefficients:
14             Estimate Std. Error t value Pr(>|t|)
15 (Intercept)  -2.3587     2.5400  -0.929 0.374966
16 PL_FEV1_Diff -0.5550     0.1021  -5.437 0.000286
17 ---
18
19 Residual standard error: 6.237 on 10 degrees of freedom
20 Multiple R-squared: 0.7472, Adjusted R-squared: 0.7219
21 F-statistic: 29.56 on 1 and 10 DF, p-value: 0.0002862
22
23
24 > confint(LinearModel.11)
25             2.5 %      97.5 %
26 (Intercept) -8.0182460  3.3008733
27 PL_FEV1_Diff -0.7825026 -0.3275514
28
29
30
31
32
33
34
35
36 > lrtest(LinearModel.10,LinearModel.11)
37 Likelihood ratio test
38
39 Model 1: VitC_Effect ~ 1
40 Model 2: VitC_Effect ~ 1 + PL_FEV1_Diff
41   #Df  LogLik Df  Chisq Pr(>Chisq)
42 1     2 -46.149
43 2     3 -37.899  1 16.502  4.861e-05
44 ---
45
46
47
48
49
50
51
52
53
54
55
56
57
58
59
60
```



```

1
2 > CohenPubImp
3   PL_FEV1_Diff VitC_Effect
4   1      -26.45      16.39
5   2      -50.00      44.90
6   3      -33.33      28.12
7   4      -27.18      18.51
8   5      -21.31      17.91
9   6      -14.58       8.29
10  7      -19.22      19.22
11  8      -21.90      38.21
12  9      -20.00      15.83
13 10      -25.13      10.32
14 11      -18.67       6.49
15 12      -40.60       0.00
16 13      -36.30       0.00
17 14      -33.30       0.00
18 15      -30.70       0.00
19 16      -28.20       0.00
20 17      -25.80       0.00
21 18      -23.20       0.00
22 19      -20.10       0.00
23 20      -15.90       0.00
24
25
26
27
28
29 > LinearModel.21 <- lm(VitC_Effect ~ 0 + PL_FEV1_Diff, data=CohenPubImp)
30
31 > summary(LinearModel.21)
32
33 Call:
34 lm(formula = VitC_Effect ~ 0 + PL_FEV1_Diff, data = CohenPubImp)
35
36 Residuals:
37     Min       1Q   Median       3Q      Max
38 -16.9609 -11.0288  -0.7439   7.8580  29.0611
39
40
41
42 Coefficients:
43             Estimate Std. Error t value Pr(>|t|)
44 PL_FEV1_Diff  -0.4178     0.1056  -3.955 0.000849
45 ---
46
47 Residual standard error: 13.2 on 19 degrees of freedom
48 Multiple R-squared:  0.4516,    Adjusted R-squared:  0.4227
49 F-statistic: 15.64 on 1 and 19 DF,  p-value: 0.0008485
50
51
52 > confint(LinearModel.21)
53             2.5 %      97.5 %
54 PL_FEV1_Diff -0.6388209 -0.1966937
55
56
57
58
59
60

```

```

1
2 > Fig_1
3   Mean   SE           Study
4 1  6.50 3.16 Tecklenburg 2007
5 2  7.38 3.83   Schachter 1982
6 3 11.20 3.24           Cohen 1997
7
8 > meta1<-metagen(Fig_1$Mean, Fig_1$SE, Fig_1$Study)
9
10 > meta1
11                                     95%-CI %W(fixed)
12 Tecklenburg 2007  6.50 [ 0.3065; 12.6935]      37.99
13 Schachter 1982   7.38 [-0.1267; 14.8867]      25.86
14 Cohen 1997      11.20 [ 4.8497; 17.5503]      36.14
15
16 Number of studies combined: k=3
17                                     95%-CI      z  p.value
18 Fixed effect model  8.4262 [4.6086; 12.2439] 4.326 < 0.0001
19
20 Quantifying heterogeneity:
21 tau^2 < 0.0001; H = 1 [1; 2.38]; I^2 = 0% [0%; 82.4%]
22
23 Test of heterogeneity:
24   Q d.f.  p.value
25  1.18    2    0.5546
26
27 Details on meta-analytical method:
28 - Inverse variance method
29 - DerSimonian-Laird estimator for tau^2
30
31
32
33
34 > Fig_1_Sens
35   Mean   SE           Study
36 1  6.50 3.16 Tecklenburg 2007
37 2  7.38 3.83   Schachter 1982
38
39 > meta1S<-metagen(Fig_1_Sens$Mean, Fig_1_Sens$SE, Fig_1_Sens$Study)
40
41 > meta1S
42                                     95%-CI %W(fixed)
43 Tecklenburg 2007 6.50 [ 0.3065; 12.6935]      59.5
44 Schachter 1982   7.38 [-0.1267; 14.8867]      40.5
45
46 Number of studies combined: k=2
47
48                                     95%-CI      z  p.value
49 Fixed effect model  6.8564 [2.0791; 11.6338] 2.8129  0.0049
50
51 Quantifying heterogeneity:
52 tau^2 < 0.0001; H = 1; I^2 = 0%
53
54 Test of heterogeneity:
55   Q d.f.  p.value
56  0.03    1    0.8593
57
58 Details on meta-analytical method:
59 - Inverse variance method
60 - DerSimonian-Laird estimator for tau^2

```

```

1
2 > Fig_4
3   Mean   SE      Study
4 1 50.40 24.48 Tecklenburg 2007
5 2 55.50 11.61  Schachter 1982
6 3 41.78 11.28      Cohen 1997
7
8 > meta4<-metagen(Fig_4$Mean, Fig_4$SE, Fig_4$Study)
9
10 > meta4
11                                     95%-CI %W(fixed)
12 Tecklenburg 2007 50.40 [ 2.4201; 98.3799]      9.85
13 Schachter 1982  55.50 [32.7448; 78.2552]     43.78
14 Cohen 1997    41.78 [19.6716; 63.8884]     46.38
15
16 Number of studies combined: k=3
17
18                                     95%-CI      z  p.value
19 Fixed effect model  48.635 [33.5792; 63.6908] 6.3313 < 0.0001
20
21 Quantifying heterogeneity:
22 tau^2 < 0.0001; H = 1 [1; 1.87]; I^2 = 0% [0%; 71.3%]
23
24 Test of heterogeneity:
25   Q d.f.  p.value
26  0.72   2   0.6962
27
28 Details on meta-analytical method:
29 - Inverse variance method
30 - DerSimonian-Laird estimator for tau^2
31
32
33
34
35
36
37
38
39
40
41
42
43
44
45
46
47
48
49
50
51
52
53
54
55
56
57
58
59
60

```

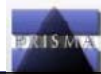

# PRISMA 2009 Checklist

1  
2  
3  
4  
5  
6  
7  
8  
9  
10  
11  
12  
13  
14  
15  
16  
17  
18  
19  
20  
21  
22  
23  
24  
25  
26  
27  
28  
29  
30  
31  
32  
33  
34  
35  
36  
37  
38  
39  
40  
41  
42  
43  
44  
45  
46  
47  
48  
49

| Section/topic                      | #  | Checklist item                                                                                                                                                                                                                                                                                              | Reported on page # |
|------------------------------------|----|-------------------------------------------------------------------------------------------------------------------------------------------------------------------------------------------------------------------------------------------------------------------------------------------------------------|--------------------|
| <b>TITLE</b>                       |    |                                                                                                                                                                                                                                                                                                             |                    |
| Title                              | 1  | Identify the report as a systematic review, meta-analysis, or both.                                                                                                                                                                                                                                         | 1                  |
| <b>ABSTRACT</b>                    |    |                                                                                                                                                                                                                                                                                                             |                    |
| Structured summary                 | 2  | Provide a structured summary including, as applicable: background; objectives; data sources; study eligibility criteria, participants, and interventions; study appraisal and synthesis methods; results; limitations; conclusions and implications of key findings; systematic review registration number. | 2                  |
| <b>INTRODUCTION</b>                |    |                                                                                                                                                                                                                                                                                                             |                    |
| Rationale                          | 3  | Describe the rationale for the review in the context of what is already known.                                                                                                                                                                                                                              | 4                  |
| Objectives                         | 4  | Provide an explicit statement of questions being addressed with reference to participants, interventions, comparisons, outcomes, and study design (PICOS).                                                                                                                                                  | 4-5                |
| <b>METHODS</b>                     |    |                                                                                                                                                                                                                                                                                                             |                    |
| Protocol and registration          | 5  | Indicate if a review protocol exists, if and where it can be accessed (e.g., Web address), and, if available, provide registration information including registration number.                                                                                                                               | no                 |
| Eligibility criteria               | 6  | Specify study characteristics (e.g., PICOS, length of follow-up) and report characteristics (e.g., years considered, language, publication status) used as criteria for eligibility, giving rationale.                                                                                                      | 6                  |
| Information sources                | 7  | Describe all information sources (e.g., databases with dates of coverage, contact with study authors to identify additional studies) in the search and date last searched.                                                                                                                                  | 7                  |
| Search                             | 8  | Present full electronic search strategy for at least one database, including any limits used, such that it could be repeated.                                                                                                                                                                               | 7                  |
| Study selection                    | 9  | State the process for selecting studies (i.e., screening, eligibility, included in systematic review, and, if applicable, included in the meta-analysis).                                                                                                                                                   | 7                  |
| Data collection process            | 10 | Describe method of data extraction from reports (e.g., piloted forms, independently, in duplicate) and any processes for obtaining and confirming data from investigators.                                                                                                                                  | 7                  |
| Data items                         | 11 | List and define all variables for which data were sought (e.g., PICOS, funding sources) and any assumptions and simplifications made.                                                                                                                                                                       | 7-8                |
| Risk of bias in individual studies | 12 | Describe methods used for assessing risk of bias of individual studies (including specification of whether this was done at the study or outcome level), and how this information is to be used in any data synthesis.                                                                                      |                    |
| Summary measures                   | 13 | State the principal summary measures (e.g., risk ratio, difference in means).                                                                                                                                                                                                                               | 6                  |
| Synthesis of results               | 14 | Describe the methods of handling data and combining results of studies, if done, including measures of consistency (e.g., $I^2$ ) for each meta-analysis.                                                                                                                                                   | 8                  |

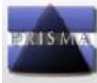

# PRISMA 2009 Checklist

Page 1 of 2

| Section/topic                 | #  | Checklist item                                                                                                                                                                                           | Reported on page # |
|-------------------------------|----|----------------------------------------------------------------------------------------------------------------------------------------------------------------------------------------------------------|--------------------|
| Risk of bias across studies   | 15 | Specify any assessment of risk of bias that may affect the cumulative evidence (e.g., publication bias, selective reporting within studies).                                                             |                    |
| Additional analyses           | 16 | Describe methods of additional analyses (e.g., sensitivity or subgroup analyses, meta-regression), if done, indicating which were pre-specified.                                                         | 7-8                |
| <b>RESULTS</b>                |    |                                                                                                                                                                                                          |                    |
| Study selection               | 17 | Give numbers of studies screened, assessed for eligibility, and included in the review, with reasons for exclusions at each stage, ideally with a flow diagram.                                          | 7,9                |
| Study characteristics         | 18 | For each study, present characteristics for which data were extracted (e.g., study size, PICOS, follow-up period) and provide the citations.                                                             | 19                 |
| Risk of bias within studies   | 19 | Present data on risk of bias of each study and, if available, any outcome level assessment (see item 12).                                                                                                | 9                  |
| Results of individual studies | 20 | For all outcomes considered (benefits or harms), present, for each study: (a) simple summary data for each intervention group (b) effect estimates and confidence intervals, ideally with a forest plot. | 9 (fig 1)          |
| Synthesis of results          | 21 | Present results of each meta-analysis done, including confidence intervals and measures of consistency.                                                                                                  | 9                  |
| Risk of bias across studies   | 22 | Present results of any assessment of risk of bias across studies (see Item 15).                                                                                                                          |                    |
| Additional analysis           | 23 | Give results of additional analyses, if done (e.g., sensitivity or subgroup analyses, meta-regression [see Item 16]).                                                                                    | 9-10               |
| <b>DISCUSSION</b>             |    |                                                                                                                                                                                                          |                    |
| Summary of evidence           | 24 | Summarize the main findings including the strength of evidence for each main outcome; consider their relevance to key groups (e.g., healthcare providers, users, and policy makers).                     | 12                 |
| Limitations                   | 25 | Discuss limitations at study and outcome level (e.g., risk of bias), and at review-level (e.g., incomplete retrieval of identified research, reporting bias).                                            | 12                 |
| Conclusions                   | 26 | Provide a general interpretation of the results in the context of other evidence, and implications for future research.                                                                                  | 12-14              |
| <b>FUNDING</b>                |    |                                                                                                                                                                                                          |                    |
| Funding                       | 27 | Describe sources of funding for the systematic review and other support (e.g., supply of data); role of funders for the systematic review.                                                               | 1                  |

From: Moher D, Liberati A, Tetzlaff J, Altman DG, The PRISMA Group (2009). Preferred Reporting Items for Systematic Reviews and Meta-Analyses: The PRISMA Statement. PLoS Med 6(6): e1000097. doi:10.1371/journal.pmed1000097

For more information, visit: [www.prisma-statement.org](http://www.prisma-statement.org).

Page 2 of 2

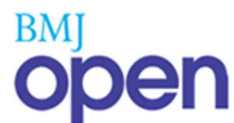

**Vitamin C may alleviate exercise-induced bronchoconstriction: a meta-analysis**

|                                 |                                                                    |
|---------------------------------|--------------------------------------------------------------------|
| Journal:                        | <i>BMJ Open</i>                                                    |
| Manuscript ID:                  | bmjopen-2012-002416.R3                                             |
| Article Type:                   | Research                                                           |
| Date Submitted by the Author:   | 16-May-2013                                                        |
| Complete List of Authors:       | Hemilä, Harri; University of Helsinki, Department of Public Health |
| <b>Primary Subject Heading</b>: | Respiratory medicine                                               |
| Secondary Subject Heading:      | Sports and exercise medicine, Nutrition and metabolism             |
| Keywords:                       | Asthma < THORACIC MEDICINE, NUTRITION & DIETETICS, SPORTS MEDICINE |
|                                 |                                                                    |

SCHOLARONE™  
Manuscripts

Peer Review Only

1  
2 Vitamin C may alleviate exercise-induced bronchoconstriction: a meta-analysis  
3  
4

5 Harri Hemilä  
6

7 Department of Public Health, POB 41, University of Helsinki, Helsinki, Finland  
8  
9

10  
11  
12  
13  
14 Harri Hemilä, MD, PhD  
15

16  
17  
18 Department of Public Health,  
19 POB 41, University of Helsinki  
20 Mannerheimintie 172  
21 FIN-00014 Helsinki  
22 Finland  
23 E-mail: harri.hemila@helsinki.fi  
24  
25  
26  
27  
28  
29

30 Words  
31

32  
33 Abstract 296  
34

35 Text 3505 (Table 1 included, Abstract and Fig Legend not included)  
36

37 This research received no specific grant from any funding agency in the public, commercial or not-  
38 for-profit sectors  
39

40 No conflicts of interest  
41  
42  
43  
44

#### 45 ABBREVIATIONS 46

47 CI, confidence interval  
48 EIB, exercise-induced bronchoconstriction  
49 FEV<sub>1</sub>, forced expiratory volume in 1 second  
50 LT, leukotriene  
51 PG, prostaglandin  
52  
53  
54

55  
56 KEY WORDS: anti-asthmatic agents, asthma, exercise-induced asthma, forced expiratory flow  
57 rates, randomized controlled trial  
58

## Abstract

### Objective

To determine whether vitamin C administration influences exercise-induced bronchoconstriction (EIB).

### Design

Systematic review and meta-analysis.

### Methods

MEDLINE and Scopus were searched for placebo-controlled trials on vitamin C and EIB. The primary measures of vitamin C effect used in this study were: 1) the arithmetic difference, and 2) the relative effect in the post-exercise FEV<sub>1</sub> decline between the vitamin C and placebo periods. The relative effect of vitamin C administration on FEV<sub>1</sub> was analyzed by using linear modelling for two studies that reported full or partial individual-level data. The arithmetic differences and the relative effects were pooled by the inverse variance method. A secondary measure of the vitamin C effect was the difference in the proportion of participants suffering from EIB on the vitamin C and placebo days.

### Results

Three placebo-controlled trials that studied the effect of vitamin C on EIB were identified. In all they had 40 participants. The pooled effect estimate indicated a reduction of 8.4 percentage points (95%CI: 4.6 to 12) in the post-exercise FEV<sub>1</sub> decline when vitamin C was administered before exercise. The pooled relative effect estimate indicated a 48% reduction (95%CI: 33% to 64%) in the post-exercise FEV<sub>1</sub> decline when vitamin C was administered before exercise. One study needed



1  
2 imputations to include it in the meta-analyses, but it also reported that vitamin C decreased the  
3  
4 proportion of participants who suffered from EIB by 50 percentage points (95%CI: 23 to 68); this  
5  
6 comparison did not need data imputations.  
7  
8  
9

## 10 11 **Conclusions**

12  
13 Given the safety and low cost of vitamin C, and the positive findings for vitamin C administration  
14  
15 in the three EIB studies, it seems reasonable for physically active people to test vitamin C when  
16  
17 they have respiratory symptoms such as cough associated with exercise. Further research on the  
18  
19 effects of vitamin C on EIB is warranted.  
20  
21  
22  
23  
24  
25  
26  
27  
28  
29  
30  
31  
32  
33  
34  
35  
36  
37  
38  
39  
40  
41  
42  
43  
44  
45  
46  
47  
48  
49  
50  
51  
52  
53  
54  
55  
56  
57  
58  
59  
60

## Article summary

### Article focus

- Exercise causes airway narrowing in about 10% of the general population and up to 50% of competitive athletes.
- Laboratory studies have indicated that vitamin C may have an alleviating influence on bronchoconstriction.
- The aim of this research was to examine whether vitamin C administration influences FEV<sub>1</sub> decline caused by exercise.

### Key messages

- Vitamin C may alleviate respiratory symptoms caused by exercise.
- In future studies, linear modelling should be used to examine the effect of vitamin C on post-exercise FEV<sub>1</sub> decline instead of calculating the mean effect of vitamin C on post-exercise FEV<sub>1</sub> decline.

### Strengths and limitations

- The included studies were methodologically satisfactory and their results were consistent and close.
- The included studies were small with 40 participants in all.

## Introduction

Exercise-induced bronchoconstriction (EIB) is a transient narrowing of the airways that occurs during or after exercise. Usually, a 10% or greater exercise-induced decline in FEV<sub>1</sub> is classified as EIB.[1] The prevalence of EIB varies from about 10% in the general population, to about 50% in some fields of competitive athletics.[1] The pathophysiology of EIB is not well understood. However, respiratory water loss leads to the release of inflammatory mediators, such as histamine, leukotrienes (LT), and prostaglandins (PG), all of which can cause bronchoconstriction.[1, 2] Increased levels of exhaled nitric oxide have also been associated with EIB.[3]

There is evidence that vitamin C plays a role in lung function. The production of various prostanoids in lung tissues is influenced by vitamin C, and vitamin C deficiency increases the level of bronchoconstrictor PGF<sub>2α</sub>. [4-6] An increase in airway hyperresponsiveness to histamine that was further enhanced by indomethacin administration, was observed in guinea pigs on a diet deficient in vitamin C.[6] In isolated guinea pig trachea smooth muscle, vitamin C decreased the contractions caused by PGF<sub>2α</sub>, histamine, and carbamylcholine.[4, 7, 8] Indomethacin antagonized the effect of vitamin C on chemically-induced bronchoconstriction in humans[9, 10] and the effect of vitamin C on the contractions of guinea pig tracheal muscle.[8] Thus, the effects of vitamin C might be partly mediated by alterations in PG metabolism. In humans, a two-week vitamin C (1.5 g/d) administration regime reduced the post-exercise increase in the urinary markers for the bronchoconstrictors LTC<sub>4</sub>-E<sub>4</sub> and PGD<sub>2</sub>, in addition to reducing the increase of exhaled nitric oxide.[11]

Heavy physical exertion generates oxidative stress, and therefore, as an antioxidant, the effects of vitamin C might be more manifest in people doing exercise.[12, 13] The importance of vitamin C

1  
2 on the respiratory system is also indicated by the decrease in the incidence of the common cold in  
3  
4 people under heavy acute physical stress[14, 15] and by its effects on the severity of the upper and  
5  
6 lower respiratory tract infections.[15-17]  
7  
8  
9

10  
11 Previously, a systematic review examined the effect of vitamin C on exercise-induced  
12  
13 bronchoconstriction.[18] However, there were substantial errors in the extraction of data and data  
14  
15 analysis in that review.[19] The purpose of this systematic review is to examine whether vitamin C  
16  
17 administration influences post-exercise FEV<sub>1</sub> decline.  
18  
19  
20  
21  
22  
23  
24  
25  
26  
27  
28  
29  
30  
31  
32  
33  
34  
35  
36  
37  
38  
39  
40  
41  
42  
43  
44  
45  
46  
47  
48  
49  
50  
51  
52  
53  
54  
55  
56  
57  
58  
59  
60

## Methods

### *Types of studies.*

Controlled trials, both randomised and non-randomised, were included in this systematic review. Only placebo-controlled blinded trials were included, as the severity of EIB might be affected by the patients' awareness of the treatment. Studies that used children and adults of either gender and any age were considered eligible.

### *Types of interventions.*

The intervention considered was oral or intravenous administration of vitamin C (ascorbic acid or its salts) of at least 0.2 g daily for a single day or for a more extended period. The dose limit was set as a pragmatic choice. When a trial with a low dose gives a negative result, the negative findings can be attributed to that low dosage. Thus, trials with large doses are more critical for testing whether vitamin C is effective at influencing EIB.

### *The outcomes and the measure of the vitamin C effect.*

The primary outcome in this meta-analysis is the relative FEV<sub>1</sub> decline caused by exercise (as a percentage). The measures selected for the vitamin C effect were: 1) the arithmetic difference in the post-exercise decline of FEV<sub>1</sub> between the placebo and vitamin C periods; this is called the percentage point difference, and 2) the relative effect in the decline of post-exercise FEV<sub>1</sub> between the vitamin C and placebo periods. A secondary outcome in this meta-analysis was the proportion of participants who suffered from EIB after the exercise test, and the measure of vitamin C effect was taken as the difference in the occurrence in EIB between the vitamin C and placebo days.

### *Literature searches.*

1  
2 MEDLINE (OVID) was searched using MESH terms “ascorbic acid” and “exercise-induced  
3  
4 asthma”. A similar search was carried out in Scopus. No language restrictions were used. The  
5  
6 databases were searched from their inception to February 2013. The reference lists of identified  
7  
8 studies and review articles were screened for additional references. See supplementary file 1 for the  
9  
10 flow diagram of the literature search.  
11  
12

13  
14  
15  
16  
17  
18 *Selection of studies and data extraction.*  
19

20 Five controlled trials that report on vitamin C and EIB were identified. Three of them satisfied the  
21  
22 selection criteria (Table I). One of the studies that was not included was not placebo controlled [22]  
23  
24 and the other studied the combination of vitamins C and E.[23] The data of the three included trials  
25  
26 were extracted and analyzed by this author. The original study authors were contacted when  
27  
28 appropriate in order to obtain further data.  
29  
30

31  
32  
33 Schachter and Schlesinger (1982) reported individual-level FEV<sub>1</sub> measurements for a 12 participant  
34  
35 cross-over study.[20] The decline in FEV<sub>1</sub> caused by exercise was calculated in this present study  
36  
37 (see supplementary file 2).  
38  
39

40  
41  
42 Tecklenburg et al. (2007) reported the mean decline in post-exercise FEV<sub>1</sub> for the vitamin C and  
43  
44 placebo phases of an 8 participant cross-over study.[11] However, these authors did not report the  
45  
46 paired SD value for the mean difference between the two phases. Dr. Tecklenburg was subsequently  
47  
48 contacted, and she kindly sent the paired SD value for the mean difference in decline of the post-  
49  
50 exercise FEV<sub>1</sub> (see supplementary file 2).  
51  
52

53  
54  
55 Cohen et al. (1997) reported FEV<sub>1</sub> values before and after exercise in only 11 of the 20 participants  
56  
57  
58  
59  
60

1  
2 of a cross-over study.[21] These 11 had been selected because of the disappearance of EIB during  
3  
4 the study. Thus, the difference in post-exercise FEV<sub>1</sub> decline between the vitamin C and placebo  
5  
6 days can be calculated for these 11 participants (the mean vitamin C effect was a reduction of 20.4  
7  
8 percentage points in the post-exercise decline in FEV<sub>1</sub>). Dr. Cohen was contacted, but he no longer  
9  
10 retained those data. Therefore, to include the Cohen et al. trial in this meta-analysis, the FEV<sub>1</sub>  
11  
12 values for the remaining 9 participants had to be imputed. A conservative "no vitamin C effect"  
13  
14 estimate was imputed for all of the 9 participants with missing data (see supplementary file 2). As a  
15  
16 sensitivity analysis, the Cohen et al. study was excluded from the meta-analysis in Fig. 1 to examine  
17  
18 whether its exclusion influenced the conclusions.  
19  
20  
21  
22  
23

24 Cohen et al. also reported the number of participants who suffered from EIB after the exercise test.  
25  
26 This outcome did not require imputations and it was used as a secondary outcome for comparing the  
27  
28 vitamin C and placebo days in the Cohen study.  
29  
30  
31  
32

### 33 *Statistical analysis.*

34  
35 The statistical heterogeneity of the three studies was assessed by using the  $\chi^2$ -test and the I<sup>2</sup>-  
36  
37 index.[24] The latter examines the percentage of total variation across studies that is due to  
38  
39 heterogeneity between studies rather than by randomness. A value of I<sup>2</sup> greater than about 70%  
40  
41 indicates a high level of heterogeneity. Since the three identified trials showed no statistical  
42  
43 heterogeneity, their results were pooled using the inverse variance method assuming fixed effect by  
44  
45 running the program "metagen" of the R package (see the supplementary file 2 for the details of the  
46  
47 calculations).[25] The program "forest.meta" of the R package was used to construct the forest  
48  
49 plots.  
50  
51  
52  
53  
54

55 To examine the relative effect of vitamin C on post-exercise FEV<sub>1</sub> decline, the vitamin C effect was  
56  
57  
58  
59  
60

1  
2 modelled using the placebo-day post-exercise FEV<sub>1</sub> decline as the explanatory variable, by using  
3  
4 the linear model "lm" program of the R package.[25] To test whether the addition of the placebo-  
5  
6 day post-exercise FEV<sub>1</sub> decline values significantly improves the linear model fit, the model  
7  
8 containing the placebo-day FEV<sub>1</sub> decline values was compared with the model without them. The  
9  
10 improvement of the model fit was calculated from the change in  $-2 \times \log(\text{likelihood})$ , which  
11  
12 follows the  $\chi^2$  (1 df) distribution.  
13  
14

15  
16  
17  
18 To study the effect of vitamin C on the proportion of participants who suffered from EIB in the  
19  
20 Cohen et al. study, the mid-P value was calculated [26] and the 95% CI was calculated by using the  
21  
22 Agresti-Caffo method.[27]  
23  
24

25  
26  
27 The 2-tailed P-values are presented in this text.  
28  
29  
30  
31  
32  
33  
34  
35  
36  
37  
38  
39  
40  
41  
42  
43  
44  
45  
46  
47  
48  
49  
50  
51  
52  
53  
54  
55  
56  
57  
58  
59  
60



**Table I: Trials on vitamin C supplementation and exercise-induced bronchoconstriction**

| Study [ref.]                      |                   | Descriptions                                                                                                                                                                                                                                                                                                                                                                                                               |
|-----------------------------------|-------------------|----------------------------------------------------------------------------------------------------------------------------------------------------------------------------------------------------------------------------------------------------------------------------------------------------------------------------------------------------------------------------------------------------------------------------|
| Schachter & Schlesinger 1982 [20] | Methods:          | Randomized, double-blind, placebo-controlled, cross-over trial.                                                                                                                                                                                                                                                                                                                                                            |
|                                   | Participants:     | 12 asthmatic subjects, selected from among workers of Yale University in the USA: "all 12 subjects gave a characteristic description of EIB." All included participants had at least 20% reduction in MEF40% after exercise.<br>5 Males, 7 Females; mean age 26 yr (SD 5 yr).                                                                                                                                              |
|                                   | Type of exercise: | Exercise by using a cycloergometer was begun at a constant speed of 20 km/h against a zero workload. At the end of each 1 min interval, the workload was increased by 150 kilopondmeters per min, keeping the pedalling speed constant throughout the experiment. Exercise against progressively larger work loads was continued until either the heart rate reached 170 beats per min or the subject fatigued.            |
|                                   | Intervention:     | On 2 subsequent days, the subjects ingested 0.5 g of vitamin C or sucrose placebo in identical capsules 1.5 h before the exercise. Washout overnight.                                                                                                                                                                                                                                                                      |
|                                   | Outcome:          | Change in FEV <sub>1</sub> was calculated as: [pre-exercise vs. 5 min post-exercise].                                                                                                                                                                                                                                                                                                                                      |
|                                   | Notes:            | See supplementary file 2 for the calculation of the vitamin C effect from the individual-level data.                                                                                                                                                                                                                                                                                                                       |
| Cohen et al. 1997 [21]            | Methods:          | Randomized, double-blind, placebo-controlled, cross-over trial.                                                                                                                                                                                                                                                                                                                                                            |
|                                   | Participants:     | 20 asthmatic subjects in Israel. All of them had demonstrated EIB by having a "decline of at least 15%" in FEV <sub>1</sub> after a standard exercise test.<br>13 Males, 7 Females; mean age 14 yr (range 7 to 28 yr).                                                                                                                                                                                                     |
|                                   | Type of exercise: | A 7-minute exercise session using a motorized treadmill. Each subject exercised to submaximal effort at a speed and slope to provide 80% of the motional oxygen consumption as adjudged by a pulse oximeter.                                                                                                                                                                                                               |
|                                   | Intervention:     | 2 g of vitamin C or placebo 1 hour before the exercise. Washout 1 week.                                                                                                                                                                                                                                                                                                                                                    |
|                                   | Outcomes:         | Change in FEV <sub>1</sub> was calculated as: [pre-exercise vs. 8 min post-exercise].<br>Secondary outcome: proportion of participants who suffered from EIB after the exercise session (decline in FEV <sub>1</sub> at least 15%).                                                                                                                                                                                        |
|                                   | Notes:            | Individual-level data on FEV <sub>1</sub> levels was reported only for 11 of the 20 participants (Cohen's Table 2). Dr. Cohen was contacted, but he no longer had the data. Therefore, a conservative "no vitamin C effect" was imputed for the 9 participants for whom experimental data were not available; see supplementary file 2.                                                                                    |
| Tecklenburg et al. 2007 [11]      | Methods:          | Randomized, double-blind, placebo-controlled, cross-over trial.                                                                                                                                                                                                                                                                                                                                                            |
|                                   | Participants:     | 8 subjects from a population of university students and the local community, Indiana USA, with physician-diagnosed mild to moderate asthma. All subjects had documented EIB as indicated by a "drop greater than 10%" in post-exercise FEV <sub>1</sub> . They also had a history of chest tightness, shortness of breath, and intermittent wheezing following exercise.<br>2 Males, 6 Females; mean age 24.5 yr (SD 5 yr) |
|                                   | Type of exercise: | Subjects ran on a motorized treadmill, elevated by 1% per min until 85% of the age predicted max heart rate and ventilation exceeding 40–60% of predicted max voluntary ventilation. Subjects maintained this exercise intensity for 6 min. Following the 6-min steady state exercise, the grade of the treadmill continued to increase at 1% per min until volitional exhaustion.                                         |
|                                   | Intervention:     | 1.5 g vitamin C or sucrose placebo were administered as capsules matched for color and size daily for 2 weeks. Washout 1 week.<br>Subjects were advised to avoid high vitamin C foods during the study.                                                                                                                                                                                                                    |
|                                   | Outcome:          | Change in FEV <sub>1</sub> was calculated as: [pre-exercise vs. the lowest value within 30 min post-exercise].                                                                                                                                                                                                                                                                                                             |
|                                   | Notes:            | Dr. S. Tecklenburg kindly made the mean and SD for the paired FEV <sub>1</sub> decline available. For the decline in FEV <sub>1</sub> level, the mean difference was +6.5                                                                                                                                                                                                                                                  |

| Study [ref.] |  | Descriptions                                              |
|--------------|--|-----------------------------------------------------------|
|              |  | percentage points (paired SD 7.4) in favour of vitamin C. |

For peer review only

## Results

Three randomized, placebo-controlled, double-blind, cross-over trials that had examined the effect of vitamin C supplementation on the decline in FEV<sub>1</sub> caused by exercise were retrieved. Double-blind means that all studies used allocation concealment, although the term was not used. The experimental conditions were similar (Table 1). The three trials had a total of 40 participants. There was no statistical heterogeneity found between the three studies for the percentage points scale:  $I^2 = 0\%$ ;  $\chi^2(2 \text{ df}) = 1.1$ ,  $P = 0.5$ . Therefore, the pooled percentage point estimate of the vitamin C effect was calculated (Fig. 1). Compared with the placebo phases, the mean reduction in post-exercise FEV<sub>1</sub> decline was 8.4 percentage points during the vitamin C phases (95% CI: 4.6 to 12.2;  $P < 0.001$ ).

In the Schachter and Schlesinger study, the post-exercise FEV<sub>1</sub> decline was 17.6% for placebo, but only 10.2% for vitamin C (0.5 g single dose), with a 7.4 percentage point (95% CI: -0.1 to 14.9;  $P = 0.054$ ) improvement for the vitamin C treatment.[20] In the Tecklenburg et al. study, the post-exercise FEV<sub>1</sub> decline was 12.9% when on placebo, but only 6.4% when on vitamin C (1.5 g/d for 2 weeks), indicating an improvement of 6.5 percentage points (95% CI: 0.3 to 12.7;  $P = 0.042$ ) for vitamin C.[11] With the conservative imputation of “no vitamin C effect” for 9 participants in the Cohen et al. study, there was a reduction in post-exercise FEV<sub>1</sub> decline by 11.2 percentage points (95% CI: 4.8 to 17.6;  $P = 0.002$ ) on the vitamin C day (2 g single dose).[21]

EIB is not a dichotomous condition; instead there is a continuous variation in the possible level of FEV<sub>1</sub> decline caused by exercise. A single constant percentage point estimate of vitamin C effect for all people who suffer from EIB may thus be simplistic. Instead, it is possible that a relative scale would better capture the effect of vitamin C. Schachter and Schlesinger published individual-level

1  
2 data for all their 12 participants,[20] and thus their data were analyzed using linear modelling to  
3  
4 examine whether the vitamin C effect might depend on the placebo-day post-exercise FEV<sub>1</sub> decline,  
5  
6 i.e., on the baseline severity of EIB (Fig. 2). Adding the placebo-day post-exercise FEV<sub>1</sub> decline  
7  
8 values to the null linear model, which is equivalent to the t-test, improved the model fit by  $\chi^2$  (1 df)  
9  
10 = 16.5, corresponding to  $P < 0.001$ . This indicates that the linear model that includes the placebo-  
11  
12 day post-exercise FEV<sub>1</sub> decline explains the effect of vitamin C much better than the constant 7.4  
13  
14 percentage point effect for all of their participants suffering from EIB. The slope of the linear model  
15  
16 indicates a 55% reduction in the decline of the post-exercise FEV<sub>1</sub> (95% CI: 32% to 78%;  $P <$   
17  
18 0.001) for vitamin C administration compared with placebo. Thus, in the percentage points scale,  
19  
20 though there was a trend towards a mean vitamin C effect, the difference between vitamin C and  
21  
22 placebo in the Schachter and Schlesinger trial was not significant ( $P = 0.054$ ), whereas in the linear  
23  
24 model, the slope indicates a highly significant difference between vitamin C and placebo ( $P <$   
25  
26 0.001).  
27  
28  
29  
30  
31  
32

33 Cohen et al. published individual level data for only 11 of their 20 participants (filled squares in Fig.  
34  
35 3).[21] A conservative “no vitamin C effect” was imputed for the remaining 9 participants (open  
36  
37 squares in Fig. 3). Only those participants who had a decline in post-exercise FEV<sub>1</sub> of at least 15%  
38  
39 were included in the Cohen study and therefore the horizontal variation in the Cohen data was  
40  
41 narrow. Fitting the linear regression line through the origin indicates a 42% reduction in post-  
42  
43 exercise FEV<sub>1</sub> decline (95% CI: 19% to 64%) with vitamin C administration.  
44  
45  
46  
47  
48

49 Tecklenburg et al. did not report individual level data for their 8 participants and the data were not  
50  
51 available.[11] The mean values indicate 50.4% (95% CI: 2.4% to 98%) reduction in post-exercise  
52  
53 FEV<sub>1</sub> decline for the vitamin C period.  
54  
55  
56  
57  
58  
59  
60

1  
2 There was no statistical heterogeneity found between the three studies on the relative effect scale:  $I^2$   
3  
4 = 0%;  $\chi^2(2 \text{ df}) = 0.7$ ,  $P = 0.7$ . Therefore, the pooled estimate of the relative vitamin C effect was  
5  
6 calculated for the three trials (Fig. 4). Compared with the placebo phases, vitamin C administration  
7  
8 reduced the post-exercise FEV<sub>1</sub> decline by 48% (95% CI: 33% to 64%;  $P < 0.001$ ).  
9  
10

11  
12  
13 As a sensitivity test, the Cohen et al. study was excluded from the meta-analysis in Fig. 1. On the  
14  
15 basis of the two remaining trials, the estimate of vitamin C effect on post-exercise FEV<sub>1</sub> decline  
16  
17 became 6.8 percentage points (95% CI: 2.0 to 11.6;  $P = 0.005$ ). Thus, the Cohen et al. study  
18  
19 imputations are not crucial for the conclusion that vitamin C influences post-exercise FEV<sub>1</sub> decline.  
20  
21

22  
23  
24 Finally, although Cohen et al. did not report individual-level data for post-exercise FEV<sub>1</sub> decline  
25  
26 values for 9 of their participants, they reported the presence or absence of EIB (at least 15% decline  
27  
28 in post-exercise FEV<sub>1</sub>) on the vitamin C and placebo days and this dichotomized FEV<sub>1</sub> outcome  
29  
30 does not suffer from missing data. On the placebo day, 100% (20/20) of participants suffered from  
31  
32 EIB, whereas on the vitamin C day, only 50% (10/20) suffered from EIB. This outcome gives 50  
33  
34 percentage point decrease (95% CI: 23 to 68;  $P < 0.001$ ) in the occurrence of EIB following vitamin  
35  
36 C administration.  
37  
38  
39  
40  
41  
42  
43  
44  
45  
46  
47  
48  
49  
50  
51  
52  
53  
54  
55  
56  
57  
58  
59  
60

## Discussion

In this meta-analysis of three randomized placebo-controlled double-blind trials, vitamin C was found to reduce the post-exercise decline in FEV<sub>1</sub> by a mean of 8.4 percentage points (Fig. 1). Nevertheless, there is a great variation in the level of FEV<sub>1</sub> decline caused by exercise. Therefore it may not be reasonable to assume that a single and constant percentage point estimate of the vitamin C effect is valid for all persons suffering from EIB. Linear modelling of the Schachter and Schlesinger data [20] indicated that it is much better to study the response to vitamin C administration as a relative effect (Fig. 2). However, full individual level data were not available for the other two trials. Nonetheless, all three studies are consistent with vitamin C administration halving the post-exercise decline in FEV<sub>1</sub> (Fig. 4).

The Cohen et al. study [21] required imputations for 9 participants, however, excluding the Cohen et al. study from the percentage point meta-analysis did not influence conclusions. Furthermore, Cohen et al. reported that the number of participants who suffered from EIB dropped from 100% on the placebo day to 50% on the vitamin C day and this outcome did not require imputations, yet the highly significant benefit of vitamin C was seen also in this outcome.

The three studies included in this systematic review indicate that 0.5 to 2 g of vitamin C administration before exercise may have a beneficial effect on many people suffering from EIB. All of the three trials were double-blind placebo-controlled randomized trials. The total number of participants in the three trials is only 40. However, the three trials were carried out in three different decades and on two different continents. The criteria for EIB differed and the mean age of participants was 14 yr in the Cohen study but 25 and 26 years in the two other studies. Still, all the studies found a 50% reduction in the post-exercise FEV<sub>1</sub> decline. It is not evident how far this 50%

1  
2 estimate can be generalized, but the close estimate in such different studies suggests that the  
3  
4 estimate may be valid also for several other people who suffer from EIB.  
5  
6  
7

8  
9 The search, screening and selection for trials, and data extraction were carried out by one person,  
10  
11 which may be considered a limitation of this study. In addition, only two data bases were searched,  
12  
13 however, in an independent literature search, the Cochrane review on vitamin C and asthma did not  
14  
15 identify more trials on vitamin C and EIB.[18] Data analysis was also done by one person, but the  
16  
17 supplementary files show the extracted data and data analyses, which makes the study transparent.  
18  
19 No risk of bias or quality assessment was done as part of this study.  
20  
21  
22  
23

24  
25 In evidence-based medicine the primary question is whether an intervention has effects on clinically  
26  
27 relevant outcomes, on symptoms and signs such as coughs. With such a perspective, the etiology of  
28  
29 respiratory symptoms is not of prime importance. Given the low cost and safety of vitamin  
30  
31 C,[15,28] and the consistency of positive findings in the three studies on EIB, it seems reasonable  
32  
33 for physically fit and active people to test vitamin C on an individual basis if they have respiratory  
34  
35 symptoms such as cough associated with exercise.  
36  
37  
38  
39

40  
41 Promising results in the EIB and common cold studies indicate that further research on vitamin C  
42  
43 and respiratory symptoms of physically active people are warranted. In future trials, statistical  
44  
45 modelling should be used to examine the effect of vitamin C on FEV<sub>1</sub> levels, instead of simply  
46  
47 calculating the percentage point estimates. Although the primary question in the evidence-based  
48  
49 medicine framework is to assess the effectiveness of vitamin C on clinically relevant outcomes, the  
50  
51 etiology of the respiratory symptoms should also be investigated in future investigations.  
52  
53  
54  
55  
56  
57  
58  
59  
60

## Acknowledgements

The author thanks Dr. Tecklenburg who kindly supplied supplementary data for this analysis. The author also thanks Elizabeth Stovold for her contributions to an early version of this manuscript, by helping in the literature searches, considering studies for inclusion, and extracting data for the meta-analysis.

For peer review only



## Legends to Figures

Fig. 1. Percentage point effect of vitamin C on the decline in FEV<sub>1</sub> caused by exercise. The vertical lines indicate the 95% CI for the three trials and the square in the middle of the lines indicates the mean effect of the study. The diamond shape at the bottom indicates the 95% CI for the pooled effect. TE, treatment effect; seTE, standard error of the TE; W, weight of the study.

Fig. 2. The effect of vitamin C on post-exercise FEV<sub>1</sub> decline as a function of the placebo-day post-exercise FEV<sub>1</sub> decline for the Schachter and Schlesinger study.[20] The squares show the 12 participants of the study. The vertical axis shows the difference in post-exercise FEV<sub>1</sub> decline between the vitamin C and the placebo days. The horizontal axis shows the post-exercise FEV<sub>1</sub> decline on the placebo day. The black line indicates the fitted linear regression line. The horizontal dash (-) line indicates the level of identity between vitamin C and placebo. See the supplementary file 2 for the calculations.

Fig. 3. The effect of vitamin C on post-exercise FEV<sub>1</sub> decline as a function of the placebo-day post-exercise FEV<sub>1</sub> decline for the Cohen et al. study.[21] The filled squares show the 11 participants for whom data were reported and the empty squares show the 9 participants to whom the conservative “no vitamin C effect” data were imputed. The vertical axis shows the difference in post-exercise FEV<sub>1</sub> decline between the vitamin C and the placebo days. The horizontal axis shows the post-exercise FEV<sub>1</sub> decline on the placebo day. The black line indicates the fitted linear regression line. The horizontal dash (-) line indicates the level of identity between vitamin C and placebo. The linear regression line was fitted through the origin, since the variation in the placebo-day FEV<sub>1</sub>

1  
2 decline values is narrow. See the supplementary file 2 for the calculations.  
3  
4  
5

6  
7 Fig. 4. Relative effect of vitamin C on the decline in FEV<sub>1</sub> caused by exercise. The vertical lines  
8 indicate the 95% CI for the three trials and the square in the middle of the lines indicates the mean  
9 effect of the study. The diamond shape at the bottom indicates the 95% CI for the pooled effect. The  
10 estimates for the Schachter 1982 and Cohen 1997 studies are based on the slopes of the linear  
11 models in Figs. 3 and 4. The estimates for the Tecklenburg 2007 study are the study mean estimates.  
12  
13  
14  
15  
16  
17  
18 TE, treatment effect; seTE, standard error of the TE; W, weight of the study.  
19  
20  
21  
22  
23  
24  
25  
26  
27  
28  
29  
30  
31  
32  
33  
34  
35  
36  
37  
38  
39  
40  
41  
42  
43  
44  
45  
46  
47  
48  
49  
50  
51  
52  
53  
54  
55  
56  
57  
58  
59  
60

## References

- 1 Weiler JM, Anderson SD, Randolph C. Pathogenesis, prevalence, diagnosis, and management of exercise-induced bronchoconstriction. *Ann Allergy Asthma Immunol* 2010;105(6 Suppl):S1-47. doi:10.1016/j.anai.2010.09.021
- 2 Anderson SD, Kippelen P. Airway injury as a mechanism for exercise-induced bronchoconstriction in elite athletes. *J Allergy Clin Immunol* 2008;122:225-235. doi:10.1016/j.jaci.2008.05.001
- 3 Buchvald F, Hermansen MN, Nielsen KG, et al. Exhaled nitric oxide predicts exercise-induced bronchoconstriction in asthmatic school children. *Chest* 2005;128:1964-1967. doi:10.1378/chest.128.4.1964
- 4 Puglisi L, Berti F, Bosisio E, et al. Ascorbic acid and PGF<sub>2</sub> $\alpha$  antagonism on tracheal smooth muscle. *Adv Prostaglandin Tromboxane Res* 1976;1:503-506.
- 5 Rothberg KG, Hitchcock M. Effects of ascorbic acid deficiency on the in vitro biosynthesis of cyclooxygenase metabolites in guinea pig lungs. *Prostaglandins Leukot Med* 1983;12:137-147. doi:10.1016/0262-1746(83)90077-X
- 6 Mohsenin V, Tremml PG, Rothberg KG, et al. Airway responsiveness and prostaglandin generation in scorbutic guinea pigs. *Prostaglandins, Leukot Essent Fatty Acids* 1988;33:149-155.
- 7 Zuskin E, Lewis AJ, Bouhuys A. Inhibition of histamine-induced airway constriction by ascorbic acid. *J Allergy Clin Immunol* 1973;51:218-226. doi:10.1016/0091-6749(73)90141-3
- 8 Sipahi E, Ercan ZS. The mechanism of the relaxing effect of ascorbic acid in guinea pig isolated tracheal muscle. *Gen Pharmacol* 1997;28:757-760. doi:10.1016/S0306-3623(96)00277-7
- 9 Ogilvy CS, DuBois AB, Douglas JS. Effects of ascorbic acid and indomethacin on the

- 1  
2  
3  
4  
5  
6  
7  
8  
9  
10  
11  
12  
13  
14  
15  
16  
17  
18  
19  
20  
21  
22  
23  
24  
25  
26  
27  
28  
29  
30  
31  
32  
33  
34  
35  
36  
37  
38  
39  
40  
41  
42  
43  
44  
45  
46  
47  
48  
49  
50  
51  
52  
53  
54  
55  
56  
57  
58  
59  
60
- airways of healthy male subjects with and without induced bronchoconstriction. *J Allergy Clin Immunol* 1981;67:363-369. doi:10.1016/0091-6749(81)90081-6
- 10 Mohsenin V, Dubois AB, Douglas JS. Effect of ascorbic acid on response to methacholine challenge in asthmatic subjects. *Am Rev Respir Dis* 1983;127:143-147.
- 11 Tecklenburg SL, Mickleborough TD, Fly AD, et al. Ascorbic acid supplementation attenuates exercise-induced bronchoconstriction in patients with asthma. *Respir Med* 2007;101:1770-1778. doi:10.1016/j.rmed.2007.02.014
- 12 Powers SK, Jackson MJ. Exercise-induced oxidative stress: cellular mechanisms and impact on muscle force production. *Physiol Rev* 2008;88:1243-76. doi:10.1152/physrev.00031.2007
- 13 Ashton T, Young IS, Peters JR, et. al. Electron spin resonance spectroscopy, exercise, and oxidative stress: an ascorbic acid intervention study. *J Appl Physiol* 1999;87:2032-6.  
<http://www.ncbi.nlm.nih.gov/pubmed/10601146>
- 14 Hemilä H. Vitamin C and common cold incidence: a review of studies with subjects under heavy physical stress. *Int J Sports Med* 1996;17:379-383. doi:10.1055/s-2007-972864  
Available at: <http://hdl.handle.net/10250/7983> (accessed 7 May 2013)
- 15 Hemilä H, Chalker E. Vitamin C for preventing and treating the common cold. *Cochrane Database Syst Rev* 2013;(1):CD000980. doi:10.1002/14651858.CD000980.pub4
- 16 Hemilä H. Vitamin C supplementation and common cold symptoms: problems with inaccurate reviews. *Nutrition* 1996;12:804-809. doi:10.1016/S0899-9007(96)00223-7  
Available at: <http://hdl.handle.net/10250/7979> (accessed 7 May 2013)
- 17 Hemilä H, Louhiala P. Vitamin C may affect lung infections. *J R Soc Med* 2007;100:495-498. doi:10.1258/jrsm.100.11.495
- 18 Kaur B, Rowe BH, Stovold E. Vitamin C supplementation for asthma. *Cochrane Database Syst Rev* 2009;(1):CD000993. doi:10.1002/14651858.CD000993.pub3
- 19 Hemilä H. Feedback. In: Kaur B, Rowe BH, Stovold E. Vitamin C supplementation for

- 1  
2 asthma. Cochrane Database Syst Rev 2009;(1):CD000993.  
3  
4 doi:10.1002/14651858.CD000993.pub3  
5  
6 Available at: <http://hdl.handle.net/10138/38500> (accessed 7 May 2013)  
7  
8  
9 20 Schachter EN, Schlesinger A. The attenuation of exercise-induced bronchospasm by ascorbic  
10 acid. *Ann Allergy* 1982;49:146-151.  
11  
12 <http://www.ncbi.nlm.nih.gov/pubmed/7114587>  
13  
14  
15 21 Cohen HA, Neuman I, Nahum H. Blocking effect of vitamin C in exercise-induced asthma.  
16 *Arch Pediatr Adolescent Med* 1997;151:367-370.  
17  
18 doi:10.1001/archpedi.1997.02170410041005  
19  
20  
21  
22 22 Miric M, Haxhiu MA. Effect of vitamin C on exercise-induced bronchoconstriction [Serbo-  
23 Croatian]. *Plucne Bolesti* 1991;43:94-97.  
24  
25 <http://www.ncbi.nlm.nih.gov/pubmed/1766998>  
26  
27  
28 23 Murphy JD, Ferguson CS, Brown KR, et al. The effect of dietary antioxidants on lung  
29 function in exercise induced asthma [abstract]. *Med Sci Sports Exerc* 2002;34(5 Suppl):S155.  
30  
31  
32  
33 24 Higgins JPT, Thompson SG, Deeks JJ, et al. Measuring inconsistency in meta-analysis. *BMJ*  
34 2003;327:557-560. doi:10.1136/bmj.327.7414.557  
35  
36  
37 25 The R Project for Statistical Computing. <http://www.r-project.org/> (accessed 7 May 2013)  
38  
39  
40 26 Lydersen S, Fagerland MW, Laake P. Recommended tests for association in 2 x 2 tables. *Stat*  
41 *Med* 2009;28:1159-75. doi:10.1002/sim.3531  
42  
43 <http://www.ncbi.nlm.nih.gov/pubmed/19170020>  
44  
45  
46 27 Fagerland MW, Lydersen S, Laake P. Recommended confidence intervals for two independent  
47 binomial proportions. *Stat Methods Med Res* 2011 (in press).  
48  
49 doi:10.1177/0962280211415469  
50  
51  
52 28 Hathcock JN, Azzi A, Blumberg J, et al. Vitamins E and C are safe across a broad range of  
53 intakes. *Am J Clin Nutr* 2005;81:736-745.  
54  
55  
56  
57  
58  
59  
60

1  
2 Vitamin C may alleviate exercise-induced bronchoconstriction: a meta-analysis  
3  
4

5 Harri Hemilä  
6

7 Department of Public Health, POB 41, University of Helsinki, Helsinki, Finland  
8  
9

10  
11  
12  
13  
14 Harri Hemilä, MD, PhD  
15

16  
17  
18 Department of Public Health,  
19 POB 41, University of Helsinki  
20 Mannerheimintie 172  
21 FIN-00014 Helsinki  
22 Finland  
23 E-mail: harri.hemila@helsinki.fi  
24  
25  
26  
27  
28  
29

30 Words  
31

32  
33 Abstract 296  
34

35 Text 3505 (Table 1 included, Abstract and Fig Legend not included)  
36

37 This research received no specific grant from any funding agency in the public, commercial or not-  
38 for-profit sectors  
39

40 No conflicts of interest  
41  
42  
43  
44

#### 45 ABBREVIATIONS 46

47 CI, confidence interval  
48 EIB, exercise-induced bronchoconstriction  
49 FEV<sub>1</sub>, forced expiratory volume in 1 second  
50 LT, leukotriene  
51 PG, prostaglandin  
52  
53  
54

55  
56 KEY WORDS: anti-asthmatic agents, asthma, exercise-induced asthma, forced expiratory flow  
57 rates, randomized controlled trial  
58

**Abstract****Objective**

To determine whether vitamin C administration influences exercise-induced bronchoconstriction (EIB).

**Design**

Systematic review and meta-analysis.

**Methods**

MEDLINE and Scopus were searched for placebo-controlled trials on vitamin C and EIB. The primary measures of vitamin C effect used in this study were: 1) the arithmetic difference, and 2) the relative effect in the post-exercise FEV<sub>1</sub> decline between the vitamin C and placebo periods. The relative effect of vitamin C administration on FEV<sub>1</sub> was analyzed by using linear modelling for two studies that reported full or partial individual-level data. The arithmetic differences and the relative effects were pooled by the inverse variance method. A secondary measure of the vitamin C effect was the difference in the proportion of participants suffering from EIB on the vitamin C and placebo days.

**Results**

Three placebo-controlled trials that studied the effect of vitamin C on EIB were identified. In all they had 40 participants. The pooled effect estimate indicated a reduction of 8.4 percentage points (95%CI: 4.6 to 12) in the post-exercise FEV<sub>1</sub> decline when vitamin C was administered before exercise. The pooled relative effect estimate indicated a 48% reduction (95%CI: 33% to 64%) in the post-exercise FEV<sub>1</sub> decline when vitamin C was administered before exercise. One study needed

1  
2 imputations to include it in the meta-analyses, but it also reported that vitamin C decreased the  
3  
4 proportion of participants who suffered from EIB by 50 percentage points (95%CI: 23 to 68); this  
5  
6 comparison did not need data imputations.  
7  
8  
9

## 10 11 **Conclusions**

12  
13 Given the safety and low cost of vitamin C, and the positive findings for vitamin C administration  
14  
15 in the three EIB studies, it seems reasonable for physically active people to test vitamin C when  
16  
17 they have respiratory symptoms such as cough associated with exercise. Further research on the  
18  
19 effects of vitamin C on EIB is warranted.  
20  
21  
22  
23  
24  
25  
26  
27  
28  
29  
30  
31  
32  
33  
34  
35  
36  
37  
38  
39  
40  
41  
42  
43  
44  
45  
46  
47  
48  
49  
50  
51  
52  
53  
54  
55  
56  
57  
58  
59  
60



## Article summary

### Article focus

- Exercise causes airway narrowing in about 10% of the general population and up to 50% of competitive athletes.
- Laboratory studies have indicated that vitamin C may have an alleviating influence on bronchoconstriction.
- The aim of this research was to examine whether vitamin C administration influences FEV<sub>1</sub> decline caused by exercise.

### Key messages

- Vitamin C may alleviate respiratory symptoms caused by exercise.
- In future studies, linear modelling should be used to examine the effect of vitamin C on post-exercise FEV<sub>1</sub> decline instead of calculating the mean effect of vitamin C on post-exercise FEV<sub>1</sub> decline.

### Strengths and limitations

- The included studies were methodologically satisfactory and their results were consistent and close.
- The included studies were small with 40 participants in all.

## Introduction

Exercise-induced bronchoconstriction (EIB) is a transient narrowing of the airways that occurs during or after exercise. Usually, a 10% or greater exercise-induced decline in FEV<sub>1</sub> is classified as EIB.[1] The prevalence of EIB varies from about 10% in the general population, to about 50% in some fields of competitive athletics.[1] The pathophysiology of EIB is not well understood. However, respiratory water loss leads to the release of inflammatory mediators, such as histamine, leukotrienes (LT), and prostaglandins (PG), all of which can cause bronchoconstriction.[1, 2] Increased levels of exhaled nitric oxide have also been associated with EIB.[3]

There is evidence that vitamin C plays a role in lung function. The production of various prostanoids in lung tissues is influenced by vitamin C, and vitamin C deficiency increases the level of bronchoconstrictor PGF<sub>2α</sub>. [4-6] An increase in airway hyperresponsiveness to histamine that was further enhanced by indomethacin administration, was observed in guinea pigs on a diet deficient in vitamin C.[6] In isolated guinea pig trachea smooth muscle, vitamin C decreased the contractions caused by PGF<sub>2α</sub>, histamine, and carbamylcholine.[4, 7, 8] Indomethacin antagonized the effect of vitamin C on chemically-induced bronchoconstriction in humans[9, 10] and the effect of vitamin C on the contractions of guinea pig tracheal muscle.[8] Thus, the effects of vitamin C might be partly mediated by alterations in PG metabolism. In humans, a two-week vitamin C (1.5 g/d) administration regime reduced the post-exercise increase in the urinary markers for the bronchoconstrictors LTC<sub>4</sub>-E<sub>4</sub> and PGD<sub>2</sub>, in addition to reducing the increase of exhaled nitric oxide.[11]

Heavy physical exertion generates oxidative stress, and therefore, as an antioxidant, the effects of vitamin C might be more manifest in people doing exercise.[12, 13] The importance of vitamin C

1  
2 on the respiratory system is also indicated by the decrease in the incidence of the common cold in  
3  
4 people under heavy acute physical stress[14, 15] and by its effects on the severity of the upper and  
5  
6 lower respiratory tract infections.[15-17]  
7  
8  
9

10  
11 Previously, a systematic review examined the effect of vitamin C on exercise-induced  
12  
13 bronchoconstriction.[18] However, there were substantial errors in the extraction of data and data  
14  
15 analysis in that review.[19] The purpose of this systematic review is to examine whether vitamin C  
16  
17 administration influences post-exercise FEV<sub>1</sub> decline.  
18  
19  
20  
21  
22  
23  
24  
25  
26  
27  
28  
29  
30  
31  
32  
33  
34  
35  
36  
37  
38  
39  
40  
41  
42  
43  
44  
45  
46  
47  
48  
49  
50  
51  
52  
53  
54  
55  
56  
57  
58  
59  
60

## Methods

### *Types of studies.*

Controlled trials, both randomised and non-randomised, were included in this systematic review. Only placebo-controlled blinded trials were included, as the severity of EIB might be affected by the patients' awareness of the treatment. Studies that used children and adults of either gender and any age were considered eligible.

### *Types of interventions.*

The intervention considered was oral or intravenous administration of vitamin C (ascorbic acid or its salts) of at least 0.2 g daily for a single day or for a more extended period. The dose limit was set as a pragmatic choice. When a trial with a low dose gives a negative result, the negative findings can be attributed to that low dosage. Thus, trials with large doses are more critical for testing whether vitamin C is effective at influencing EIB.

### *The outcomes and the measure of the vitamin C effect.*

The primary outcome in this meta-analysis is the relative FEV<sub>1</sub> decline caused by exercise (as a percentage). The measures selected for the vitamin C effect were: 1) the arithmetic difference in the post-exercise decline of FEV<sub>1</sub> between the placebo and vitamin C periods; this is called the percentage point difference, and 2) the relative effect in the decline of post-exercise FEV<sub>1</sub> between the vitamin C and placebo periods. A secondary outcome in this meta-analysis was the proportion of participants who suffered from EIB after the exercise test, and the measure of vitamin C effect was taken as the difference in the occurrence in EIB between the vitamin C and placebo days.

### *Literature searches.*

1  
2 MEDLINE (OVID) was searched using MESH terms “ascorbic acid” and “exercise-induced  
3  
4 asthma”. A similar search was carried out in Scopus. No language restrictions were used. The  
5  
6 databases were searched from their inception to February 2013. The reference lists of identified  
7  
8 studies and review articles were screened for additional references. See supplementary file 1 for the  
9  
10 flow diagram of the literature search.  
11  
12

13  
14  
15  
16  
17  
18 *Selection of studies and data extraction.*  
19

20 Five controlled trials that report on vitamin C and EIB were identified. Three of them satisfied the  
21  
22 selection criteria (Table I). One of the studies that was not included was not placebo controlled [22]  
23  
24 and the other studied the combination of vitamins C and E.[23] The data of the three included trials  
25  
26 were extracted and analyzed by this author. The original study authors were contacted when  
27  
28 appropriate in order to obtain further data.  
29  
30

31  
32  
33 Schachter and Schlesinger (1982) reported individual-level FEV<sub>1</sub> measurements for a 12 participant  
34  
35 cross-over study.[20] The decline in FEV<sub>1</sub> caused by exercise was calculated in this present study  
36  
37 (see supplementary file 2).  
38  
39

40  
41  
42 Tecklenburg et al. (2007) reported the mean decline in post-exercise FEV<sub>1</sub> for the vitamin C and  
43  
44 placebo phases of an 8 participant cross-over study.[11] However, these authors did not report the  
45  
46 paired SD value for the mean difference between the two phases. Dr. Tecklenburg was subsequently  
47  
48 contacted, and she kindly sent the paired SD value for the mean difference in decline of the post-  
49  
50 exercise FEV<sub>1</sub> (see supplementary file 2).  
51  
52

53  
54  
55 Cohen et al. (1997) reported FEV<sub>1</sub> values before and after exercise in only 11 of the 20 participants  
56  
57  
58  
59  
60

1  
2 of a cross-over study.[21] These 11 had been selected because of the disappearance of EIB during  
3  
4 the study. Thus, the difference in post-exercise FEV<sub>1</sub> decline between the vitamin C and placebo  
5  
6 days can be calculated for these 11 participants (the mean vitamin C effect was a reduction of 20.4  
7  
8 percentage points in the post-exercise decline in FEV<sub>1</sub>). Dr. Cohen was contacted, but he no longer  
9  
10 retained those data. Therefore, to include the Cohen et al. trial in this meta-analysis, the FEV<sub>1</sub>  
11  
12 values for the remaining 9 participants had to be imputed. A conservative "no vitamin C effect"  
13  
14 estimate was imputed for all of the 9 participants with missing data (see supplementary file 2). As a  
15  
16 sensitivity analysis, the Cohen et al. study was excluded from the meta-analysis in Fig. 1 to examine  
17  
18 whether its exclusion influenced the conclusions.  
19  
20  
21  
22  
23

24 Cohen et al. also reported the number of participants who suffered from EIB after the exercise test.  
25  
26 This outcome did not require imputations and it was used as a secondary outcome for comparing the  
27  
28 vitamin C and placebo days in the Cohen study.  
29  
30  
31  
32

### 33 *Statistical analysis.*

34  
35 The statistical heterogeneity of the three studies was assessed by using the  $\chi^2$ -test and the I<sup>2</sup>-  
36  
37 index.[24] The latter examines the percentage of total variation across studies that is due to  
38  
39 heterogeneity between studies rather than by randomness. A value of I<sup>2</sup> greater than about 70%  
40  
41 indicates a high level of heterogeneity. Since the three identified trials showed no statistical  
42  
43 heterogeneity, their results were pooled using the inverse variance method assuming fixed effect by  
44  
45 running the program "metagen" of the R package (see the supplementary file 2 for the details of the  
46  
47 calculations).[25] The program "forest.meta" of the R package was used to construct the forest  
48  
49 plots.  
50  
51  
52  
53  
54

55 To examine the relative effect of vitamin C on post-exercise FEV<sub>1</sub> decline, the vitamin C effect was  
56  
57  
58  
59  
60

1  
2 modelled using the placebo-day post-exercise FEV<sub>1</sub> decline as the explanatory variable, by using  
3  
4 the linear model "lm" program of the R package.[25] To test whether the addition of the placebo-  
5  
6 day post-exercise FEV<sub>1</sub> decline values significantly improves the linear model fit, the model  
7  
8 containing the placebo-day FEV<sub>1</sub> decline values was compared with the model without them. The  
9  
10 improvement of the model fit was calculated from the change in  $-2 \times \log(\text{likelihood})$ , which  
11  
12 follows the  $\chi^2$  (1 df) distribution.  
13  
14

15  
16  
17  
18 To study the effect of vitamin C on the proportion of participants who suffered from EIB in the  
19  
20 Cohen et al. study, the mid-P value was calculated [26] and the 95% CI was calculated by using the  
21  
22 Agresti-Caffo method.[27]  
23  
24

25  
26  
27 The 2-tailed P-values are presented in this text.  
28  
29  
30  
31  
32  
33  
34  
35  
36  
37  
38  
39  
40  
41  
42  
43  
44  
45  
46  
47  
48  
49  
50  
51  
52  
53  
54  
55  
56  
57  
58  
59  
60

**Table I: Trials on vitamin C supplementation and exercise-induced bronchoconstriction**

| Study [ref.]                      |                   | Descriptions                                                                                                                                                                                                                                                                                                                                                                                                               |
|-----------------------------------|-------------------|----------------------------------------------------------------------------------------------------------------------------------------------------------------------------------------------------------------------------------------------------------------------------------------------------------------------------------------------------------------------------------------------------------------------------|
| Schachter & Schlesinger 1982 [20] | Methods:          | Randomized, double-blind, placebo-controlled, cross-over trial.                                                                                                                                                                                                                                                                                                                                                            |
|                                   | Participants:     | 12 asthmatic subjects, selected from among workers of Yale University in the USA: "all 12 subjects gave a characteristic description of EIB." All included participants had at least 20% reduction in MEF40% after exercise.<br>5 Males, 7 Females; mean age 26 yr (SD 5 yr).                                                                                                                                              |
|                                   | Type of exercise: | Exercise by using a cycloergometer was begun at a constant speed of 20 km/h against a zero workload. At the end of each 1 min interval, the workload was increased by 150 kilopondmeters per min, keeping the pedalling speed constant throughout the experiment. Exercise against progressively larger work loads was continued until either the heart rate reached 170 beats per min or the subject fatigued.            |
|                                   | Intervention:     | On 2 subsequent days, the subjects ingested 0.5 g of vitamin C or sucrose placebo in identical capsules 1.5 h before the exercise. Washout overnight.                                                                                                                                                                                                                                                                      |
|                                   | Outcome:          | Change in FEV <sub>1</sub> was calculated as: [pre-exercise vs. 5 min post-exercise].                                                                                                                                                                                                                                                                                                                                      |
|                                   | Notes:            | See supplementary file 2 for the calculation of the vitamin C effect from the individual-level data.                                                                                                                                                                                                                                                                                                                       |
| Cohen et al. 1997 [21]            | Methods:          | Randomized, double-blind, placebo-controlled, cross-over trial.                                                                                                                                                                                                                                                                                                                                                            |
|                                   | Participants:     | 20 asthmatic subjects in Israel. All of them had demonstrated EIB by having a "decline of at least 15%" in FEV <sub>1</sub> after a standard exercise test.<br>13 Males, 7 Females; mean age 14 yr (range 7 to 28 yr).                                                                                                                                                                                                     |
|                                   | Type of exercise: | A 7-minute exercise session using a motorized treadmill. Each subject exercised to submaximal effort at a speed and slope to provide 80% of the motional oxygen consumption as adjudged by a pulse oximeter.                                                                                                                                                                                                               |
|                                   | Intervention:     | 2 g of vitamin C or placebo 1 hour before the exercise. Washout 1 week.                                                                                                                                                                                                                                                                                                                                                    |
|                                   | Outcomes:         | Change in FEV <sub>1</sub> was calculated as: [pre-exercise vs. 8 min post-exercise].<br>Secondary outcome: proportion of participants who suffered from EIB after the exercise session (decline in FEV <sub>1</sub> at least 15%).                                                                                                                                                                                        |
|                                   | Notes:            | Individual-level data on FEV <sub>1</sub> levels was reported only for 11 of the 20 participants (Cohen's Table 2). Dr. Cohen was contacted, but he no longer had the data. Therefore, a conservative "no vitamin C effect" was imputed for the 9 participants for whom experimental data were not available; see supplementary file 2.                                                                                    |
| Tecklenburg et al. 2007 [11]      | Methods:          | Randomized, double-blind, placebo-controlled, cross-over trial.                                                                                                                                                                                                                                                                                                                                                            |
|                                   | Participants:     | 8 subjects from a population of university students and the local community, Indiana USA, with physician-diagnosed mild to moderate asthma. All subjects had documented EIB as indicated by a "drop greater than 10%" in post-exercise FEV <sub>1</sub> . They also had a history of chest tightness, shortness of breath, and intermittent wheezing following exercise.<br>2 Males, 6 Females; mean age 24.5 yr (SD 5 yr) |
|                                   | Type of exercise: | Subjects ran on a motorized treadmill, elevated by 1% per min until 85% of the age predicted max heart rate and ventilation exceeding 40–60% of predicted max voluntary ventilation. Subjects maintained this exercise intensity for 6 min. Following the 6-min steady state exercise, the grade of the treadmill continued to increase at 1% per min until volitional exhaustion.                                         |
|                                   | Intervention:     | 1.5 g vitamin C or sucrose placebo were administered as capsules matched for color and size daily for 2 weeks. Washout 1 week.<br>Subjects were advised to avoid high vitamin C foods during the study.                                                                                                                                                                                                                    |
|                                   | Outcome:          | Change in FEV <sub>1</sub> was calculated as: [pre-exercise vs. the lowest value within 30 min post-exercise].                                                                                                                                                                                                                                                                                                             |
|                                   | Notes:            | Dr. S. Tecklenburg kindly made the mean and SD for the paired FEV <sub>1</sub> decline available. For the decline in FEV <sub>1</sub> level, the mean difference was +6.5                                                                                                                                                                                                                                                  |



1  
2  
3  
4  
5  
6  
7  
8  
9  
10  
11  
12  
13  
14  
15  
16  
17  
18  
19  
20  
21  
22  
23  
24  
25  
26  
27  
28  
29  
30  
31  
32  
33  
34  
35  
36  
37  
38  
39  
40  
41  
42  
43  
44  
45  
46  
47  
48  
49  
50  
51  
52  
53  
54  
55  
56  
57  
58  
59  
60

| Study [ref.] |  | Descriptions                                              |
|--------------|--|-----------------------------------------------------------|
|              |  | percentage points (paired SD 7.4) in favour of vitamin C. |

For peer review only

## Results

Three randomized, placebo-controlled, double-blind, cross-over trials that had examined the effect of vitamin C supplementation on the decline in FEV<sub>1</sub> caused by exercise were retrieved. Double-blind means that all studies used allocation concealment, although the term was not used. The experimental conditions were similar (Table 1). The three trials had a total of 40 participants. There was no statistical heterogeneity found between the three studies for the percentage points scale:  $I^2 = 0\%$ ;  $\chi^2(2 \text{ df}) = 1.1$ ,  $P = 0.5$ . Therefore, the pooled percentage point estimate of the vitamin C effect was calculated (Fig. 1). Compared with the placebo phases, the mean reduction in post-exercise FEV<sub>1</sub> decline was 8.4 percentage points during the vitamin C phases (95% CI: 4.6 to 12.2;  $P < 0.001$ ).

In the Schachter and Schlesinger study, the post-exercise FEV<sub>1</sub> decline was 17.6% for placebo, but only 10.2% for vitamin C (0.5 g single dose), with a 7.4 percentage point (95% CI: -0.1 to 14.9;  $P = 0.054$ ) improvement for the vitamin C treatment.[20] In the Tecklenburg et al. study, the post-exercise FEV<sub>1</sub> decline was 12.9% when on placebo, but only 6.4% when on vitamin C (1.5 g/d for 2 weeks), indicating an improvement of 6.5 percentage points (95% CI: 0.3 to 12.7;  $P = 0.042$ ) for vitamin C.[11] With the conservative imputation of “no vitamin C effect” for 9 participants in the Cohen et al. study, there was a reduction in post-exercise FEV<sub>1</sub> decline by 11.2 percentage points (95% CI: 4.8 to 17.6;  $P = 0.002$ ) on the vitamin C day (2 g single dose).[21]

EIB is not a dichotomous condition; instead there is a continuous variation in the possible level of FEV<sub>1</sub> decline caused by exercise. A single constant percentage point estimate of vitamin C effect for all people who suffer from EIB may thus be simplistic. Instead, it is possible that a relative scale would better capture the effect of vitamin C. Schachter and Schlesinger published individual-level

1  
2 data for all their 12 participants,[20] and thus their data were analyzed using linear modelling to  
3  
4 examine whether the vitamin C effect might depend on the placebo-day post-exercise FEV<sub>1</sub> decline,  
5  
6 i.e., on the baseline severity of EIB (Fig. 2). Adding the placebo-day post-exercise FEV<sub>1</sub> decline  
7  
8 values to the null linear model, which is equivalent to the t-test, improved the model fit by  $\chi^2$  (1 df)  
9  
10 = 16.5, corresponding to  $P < 0.001$ . This indicates that the linear model that includes the placebo-  
11  
12 day post-exercise FEV<sub>1</sub> decline explains the effect of vitamin C much better than the constant 7.4  
13  
14 percentage point effect for all of their participants suffering from EIB. The slope of the linear model  
15  
16 indicates a 55% reduction in the decline of the post-exercise FEV<sub>1</sub> (95% CI: 32% to 78%;  $P <$   
17  
18 0.001) for vitamin C administration compared with placebo. Thus, in the percentage points scale,  
19  
20 though there was a trend towards a mean vitamin C effect, the difference between vitamin C and  
21  
22 placebo in the Schachter and Schlesinger trial was not significant ( $P = 0.054$ ), whereas in the linear  
23  
24 model, the slope indicates a highly significant difference between vitamin C and placebo ( $P <$   
25  
26 0.001).  
27  
28  
29  
30  
31  
32

33 Cohen et al. published individual level data for only 11 of their 20 participants (filled squares in Fig.  
34  
35 3).[21] A conservative “no vitamin C effect” was imputed for the remaining 9 participants (open  
36  
37 squares in Fig. 3). Only those participants who had a decline in post-exercise FEV<sub>1</sub> of at least 15%  
38  
39 were included in the Cohen study and therefore the horizontal variation in the Cohen data was  
40  
41 narrow. Fitting the linear regression line through the origin indicates a 42% reduction in post-  
42  
43 exercise FEV<sub>1</sub> decline (95% CI: 19% to 64%) with vitamin C administration.  
44  
45  
46  
47  
48

49 Tecklenburg et al. did not report individual level data for their 8 participants and the data were not  
50  
51 available.[11] The mean values indicate 50.4% (95% CI: 2.4% to 98%) reduction in post-exercise  
52  
53 FEV<sub>1</sub> decline for the vitamin C period.  
54  
55  
56  
57  
58  
59  
60

1  
2 There was no statistical heterogeneity found between the three studies on the relative effect scale:  $I^2$   
3  
4 = 0%;  $\chi^2(2 \text{ df}) = 0.7$ ,  $P = 0.7$ . Therefore, the pooled estimate of the relative vitamin C effect was  
5  
6 calculated for the three trials (Fig. 4). Compared with the placebo phases, vitamin C administration  
7  
8 reduced the post-exercise FEV<sub>1</sub> decline by 48% (95% CI: 33% to 64%;  $P < 0.001$ ).  
9  
10

11  
12  
13 As a sensitivity test, the Cohen et al. study was excluded from the meta-analysis in Fig. 1. On the  
14  
15 basis of the two remaining trials, the estimate of vitamin C effect on post-exercise FEV<sub>1</sub> decline  
16  
17 became 6.8 percentage points (95% CI: 2.0 to 11.6;  $P = 0.005$ ). Thus, the Cohen et al. study  
18  
19 imputations are not crucial for the conclusion that vitamin C influences post-exercise FEV<sub>1</sub> decline.  
20  
21

22  
23  
24 Finally, although Cohen et al. did not report individual-level data for post-exercise FEV<sub>1</sub> decline  
25  
26 values for 9 of their participants, they reported the presence or absence of EIB (at least 15% decline  
27  
28 in post-exercise FEV<sub>1</sub>) on the vitamin C and placebo days and this dichotomized FEV<sub>1</sub> outcome  
29  
30 does not suffer from missing data. On the placebo day, 100% (20/20) of participants suffered from  
31  
32 EIB, whereas on the vitamin C day, only 50% (10/20) suffered from EIB. This outcome gives 50  
33  
34 percentage point decrease (95% CI: 23 to 68;  $P < 0.001$ ) in the occurrence of EIB following vitamin  
35  
36 C administration.  
37  
38  
39  
40  
41  
42  
43  
44  
45  
46  
47  
48  
49  
50  
51  
52  
53  
54  
55  
56  
57  
58  
59  
60

## Discussion

In this meta-analysis of three randomized placebo-controlled double-blind trials, vitamin C was found to reduce the post-exercise decline in FEV<sub>1</sub> by a mean of 8.4 percentage points (Fig. 1). Nevertheless, there is a great variation in the level of FEV<sub>1</sub> decline caused by exercise. Therefore it may not be reasonable to assume that a single and constant percentage point estimate of the vitamin C effect is valid for all persons suffering from EIB. Linear modelling of the Schachter and Schlesinger data [20] indicated that it is much better to study the response to vitamin C administration as a relative effect (Fig. 2). However, full individual level data were not available for the other two trials. Nonetheless, all three studies are consistent with vitamin C administration halving the post-exercise decline in FEV<sub>1</sub> (Fig. 4).

The Cohen et al. study [21] required imputations for 9 participants, however, excluding the Cohen et al. study from the percentage point meta-analysis did not influence conclusions. Furthermore, Cohen et al. reported that the number of participants who suffered from EIB dropped from 100% on the placebo day to 50% on the vitamin C day and this outcome did not require imputations, yet the highly significant benefit of vitamin C was seen also in this outcome.

The three studies included in this systematic review indicate that 0.5 to 2 g of vitamin C administration before exercise may have a beneficial effect on many people suffering from EIB. All of the three trials were double-blind placebo-controlled randomized trials. The total number of participants in the three trials is only 40. However, the three trials were carried out in three different decades and on two different continents. The criteria for EIB differed and the mean age of participants was 14 yr in the Cohen study but 25 and 26 years in the two other studies. Still, all the studies found a 50% reduction in the post-exercise FEV<sub>1</sub> decline. It is not evident how far this 50%

1  
2 estimate can be generalized, but the close estimate in such different studies suggests that the  
3  
4 estimate may be valid also for several other people who suffer from EIB.  
5  
6  
7

8  
9 The search, screening and selection for trials, and data extraction were carried out by one person,  
10  
11 which may be considered a limitation of this study. In addition, only two data bases were searched,  
12  
13 however, in an independent literature search, the Cochrane review on vitamin C and asthma did not  
14  
15 identify more trials on vitamin C and EIB.[18] Data analysis was also done by one person, but the  
16  
17 supplementary files show the extracted data and data analyses, which makes the study transparent.  
18

19 No risk of bias or quality assessment was done as part of this study.  
20  
21  
22  
23

24 In evidence-based medicine the primary question is whether an intervention has effects on clinically  
25  
26 relevant outcomes, on symptoms and signs such as coughs. With such a perspective, the etiology of  
27  
28 respiratory symptoms is not of prime importance. ~~In addition to the three EIB trials analyzed in this  
29  
30 systematic review, six common cold studies have reported the benefits of vitamin C administration  
31  
32 for respiratory symptoms of people under heavy physical stress.[14, 15, 28]~~ Given the low cost and  
33  
34 safety of vitamin C,[15,2829] and the consistency of positive findings in the three studies on EIB  
35  
36 ~~and the six studies on the common cold~~, it seems reasonable for physically fit and active people to  
37  
38 test vitamin C on an individual basis if they have respiratory symptoms such as cough associated  
39  
40 with exercise.  
41  
42  
43  
44  
45

46 Promising results in the EIB and common cold studies indicate that further research on vitamin C  
47  
48 and respiratory symptoms of physically active people are warranted. In future trials, statistical  
49  
50 modelling should be used to examine the effect of vitamin C on FEV<sub>1</sub> levels, instead of simply  
51  
52 calculating the percentage point estimates. Although the primary question in the evidence-based  
53  
54 medicine framework is to assess the effectiveness of vitamin C on clinically relevant outcomes, the  
55  
56  
57  
58  
59  
60

1  
2 etiology of the respiratory symptoms should also be investigated in future investigations.  
3  
4  
5  
6  
7  
8  
9

## 10 11 **Acknowledgements** 12

13  
14  
15 The author thanks Dr. Tecklenburg who kindly supplied supplementary data for this analysis. The  
16 author also thanks Elizabeth Stovold for her contributions to an early version of this manuscript, by  
17 helping in the literature searches, considering studies for inclusion, and extracting data for the meta-  
18 analysis.  
19  
20  
21  
22  
23  
24  
25  
26  
27  
28  
29  
30  
31  
32  
33  
34  
35  
36  
37  
38  
39  
40  
41  
42  
43  
44  
45  
46  
47  
48  
49  
50  
51  
52  
53  
54  
55  
56  
57  
58  
59  
60

## Legends to Figures

Fig. 1. Percentage point effect of vitamin C on the decline in FEV<sub>1</sub> caused by exercise. The vertical lines indicate the 95% CI for the three trials and the square in the middle of the lines indicates the mean effect of the study. The diamond shape at the bottom indicates the 95% CI for the pooled effect. TE, treatment effect; seTE, standard error of the TE; W, weight of the study.

Fig. 2. The effect of vitamin C on post-exercise FEV<sub>1</sub> decline as a function of the placebo-day post-exercise FEV<sub>1</sub> decline for the Schachter and Schlesinger study.[20] The squares show the 12 participants of the study. The vertical axis shows the difference in post-exercise FEV<sub>1</sub> decline between the vitamin C and the placebo days. The horizontal axis shows the post-exercise FEV<sub>1</sub> decline on the placebo day. The black line indicates the fitted linear regression line. The horizontal dash (-) line indicates the level of identity between vitamin C and placebo. See the supplementary file 2 for the calculations.

Fig. 3. The effect of vitamin C on post-exercise FEV<sub>1</sub> decline as a function of the placebo-day post-exercise FEV<sub>1</sub> decline for the Cohen et al. study.[21] The filled squares show the 11 participants for whom data were reported and the empty squares show the 9 participants to whom the conservative “no vitamin C effect” data were imputed. The vertical axis shows the difference in post-exercise FEV<sub>1</sub> decline between the vitamin C and the placebo days. The horizontal axis shows the post-exercise FEV<sub>1</sub> decline on the placebo day. The black line indicates the fitted linear regression line. The horizontal dash (-) line indicates the level of identity between vitamin C and placebo. The linear regression line was fitted through the origin, since the variation in the placebo-day FEV<sub>1</sub>



1  
2 decline values is narrow. See the supplementary file 2 for the calculations.  
3  
4  
5

6  
7 Fig. 4. Relative effect of vitamin C on the decline in FEV<sub>1</sub> caused by exercise. The vertical lines  
8 indicate the 95% CI for the three trials and the square in the middle of the lines indicates the mean  
9 effect of the study. The diamond shape at the bottom indicates the 95% CI for the pooled effect. The  
10 estimates for the Schachter 1982 and Cohen 1997 studies are based on the slopes of the linear  
11 models in Figs. 3 and 4. The estimates for the Tecklenburg 2007 study are the study mean estimates.  
12  
13  
14  
15  
16  
17  
18 TE, treatment effect; seTE, standard error of the TE; W, weight of the study.  
19  
20  
21  
22  
23  
24  
25  
26  
27  
28  
29  
30  
31  
32  
33  
34  
35  
36  
37  
38  
39  
40  
41  
42  
43  
44  
45  
46  
47  
48  
49  
50  
51  
52  
53  
54  
55  
56  
57  
58  
59  
60

## References

- 1 Weiler JM, Anderson SD, Randolph C. Pathogenesis, prevalence, diagnosis, and management of exercise-induced bronchoconstriction. *Ann Allergy Asthma Immunol* 2010;105(6 Suppl):S1-47. doi:10.1016/j.anai.2010.09.021
- 2 Anderson SD, Kippelen P. Airway injury as a mechanism for exercise-induced bronchoconstriction in elite athletes. *J Allergy Clin Immunol* 2008;122:225-235. doi:10.1016/j.jaci.2008.05.001
- 3 Buchvald F, Hermansen MN, Nielsen KG, et al. Exhaled nitric oxide predicts exercise-induced bronchoconstriction in asthmatic school children. *Chest* 2005;128:1964-1967. doi:10.1378/chest.128.4.1964
- 4 Puglisi L, Berti F, Bosisio E, et al. Ascorbic acid and PGF $2\alpha$  antagonism on tracheal smooth muscle. *Adv Prostaglandin Tromboxane Res* 1976;1:503-506.
- 5 Rothberg KG, Hitchcock M. Effects of ascorbic acid deficiency on the in vitro biosynthesis of cyclooxygenase metabolites in guinea pig lungs. *Prostaglandins Leukot Med* 1983;12:137-147. doi:10.1016/0262-1746(83)90077-X
- 6 Mohsenin V, Tremml PG, Rothberg KG, et al. Airway responsiveness and prostaglandin generation in scorbutic guinea pigs. *Prostaglandins, Leukot Essent Fatty Acids* 1988;33:149-155.
- 7 Zuskin E, Lewis AJ, Bouhuys A. Inhibition of histamine-induced airway constriction by ascorbic acid. *J Allergy Clin Immunol* 1973;51:218-226. doi:10.1016/0091-6749(73)90141-3
- 8 Sipahi E, Ercan ZS. The mechanism of the relaxing effect of ascorbic acid in guinea pig isolated tracheal muscle. *Gen Pharmacol* 1997;28:757-760. doi:10.1016/S0306-3623(96)00277-7
- 9 Ogilvy CS, DuBois AB, Douglas JS. Effects of ascorbic acid and indomethacin on the

- 1  
2  
3  
4  
5  
6  
7  
8  
9  
10  
11  
12  
13  
14  
15  
16  
17  
18  
19  
20  
21  
22  
23  
24  
25  
26  
27  
28  
29  
30  
31  
32  
33  
34  
35  
36  
37  
38  
39  
40  
41  
42  
43  
44  
45  
46  
47  
48  
49  
50  
51  
52  
53  
54  
55  
56  
57  
58  
59  
60
- airways of healthy male subjects with and without induced bronchoconstriction. *J Allergy Clin Immunol* 1981;67:363-369. doi:10.1016/0091-6749(81)90081-6
- 10 Mohsenin V, Dubois AB, Douglas JS. Effect of ascorbic acid on response to methacholine challenge in asthmatic subjects. *Am Rev Respir Dis* 1983;127:143-147.
- 11 Tecklenburg SL, Mickleborough TD, Fly AD, et al. Ascorbic acid supplementation attenuates exercise-induced bronchoconstriction in patients with asthma. *Respir Med* 2007;101:1770-1778. doi:10.1016/j.rmed.2007.02.014
- 12 Powers SK, Jackson MJ. Exercise-induced oxidative stress: cellular mechanisms and impact on muscle force production. *Physiol Rev* 2008;88:1243-76. doi:10.1152/physrev.00031.2007
- 13 Ashton T, Young IS, Peters JR, et. al. Electron spin resonance spectroscopy, exercise, and oxidative stress: an ascorbic acid intervention study. *J Appl Physiol* 1999;87:2032-6.  
<http://www.ncbi.nlm.nih.gov/pubmed/10601146>
- 14 Hemilä H. Vitamin C and common cold incidence: a review of studies with subjects under heavy physical stress. *Int J Sports Med* 1996;17:379-383. doi:10.1055/s-2007-972864  
Available at: <http://hdl.handle.net/10250/7983> (accessed 7 May 2013)
- 15 Hemilä H, Chalker E. Vitamin C for preventing and treating the common cold. *Cochrane Database Syst Rev* 2013;(1):CD000980. doi:10.1002/14651858.CD000980.pub4
- 16 Hemilä H. Vitamin C supplementation and common cold symptoms: problems with inaccurate reviews. *Nutrition* 1996;12:804-809. doi:10.1016/S0899-9007(96)00223-7  
Available at: <http://hdl.handle.net/10250/7979> (accessed 7 May 2013)
- 17 Hemilä H, Louhiala P. Vitamin C may affect lung infections. *J R Soc Med* 2007;100:495-498. doi:10.1258/jrsm.100.11.495
- 18 Kaur B, Rowe BH, Stovold E. Vitamin C supplementation for asthma. *Cochrane Database Syst Rev* 2009;(1):CD000993. doi:10.1002/14651858.CD000993.pub3
- 19 Hemilä H. Feedback. In: Kaur B, Rowe BH, Stovold E. Vitamin C supplementation for

- 1  
2 asthma. Cochrane Database Syst Rev 2009;(1):CD000993.  
3  
4 doi:10.1002/14651858.CD000993.pub3  
5  
6 Available at: <http://hdl.handle.net/10138/38500> (accessed 7 May 2013)  
7  
8  
9 20 Schachter EN, Schlesinger A. The attenuation of exercise-induced bronchospasm by ascorbic  
10 acid. *Ann Allergy* 1982;49:146-151.  
11  
12 <http://www.ncbi.nlm.nih.gov/pubmed/7114587>  
13  
14  
15 21 Cohen HA, Neuman I, Nahum H. Blocking effect of vitamin C in exercise-induced asthma.  
16 *Arch Pediatr Adolescent Med* 1997;151:367-370.  
17  
18 doi:10.1001/archpedi.1997.02170410041005  
19  
20  
21  
22 22 Miric M, Haxhiu MA. Effect of vitamin C on exercise-induced bronchoconstriction [Serbo-  
23 Croatian]. *Plucne Bolesti* 1991;43:94-97.  
24  
25 <http://www.ncbi.nlm.nih.gov/pubmed/1766998>  
26  
27  
28 23 Murphy JD, Ferguson CS, Brown KR, et al. The effect of dietary antioxidants on lung  
29 function in exercise induced asthma [abstract]. *Med Sci Sports Exerc* 2002;34(5 Suppl):S155.  
30  
31  
32  
33 24 Higgins JPT, Thompson SG, Deeks JJ, et al. Measuring inconsistency in meta-analysis. *BMJ*  
34 2003;327:557-560. doi:10.1136/bmj.327.7414.557  
35  
36  
37 25 The R Project for Statistical Computing. <http://www.r-project.org/> (accessed 7 May 2013)  
38  
39  
40 26 Lydersen S, Fagerland MW, Laake P. Recommended tests for association in 2 x 2 tables. *Stat*  
41 *Med* 2009;28:1159-75. doi:10.1002/sim.3531  
42  
43 <http://www.ncbi.nlm.nih.gov/pubmed/19170020>  
44  
45  
46 27 Fagerland MW, Lydersen S, Laake P. Recommended confidence intervals for two independent  
47 binomial proportions. *Stat Methods Med Res* 2011 (in press).  
48  
49 doi:10.1177/0962280211415469  
50  
51  
52 ~~28 Constantini NW, Dubnov-Raz G, Eyal BB, et al. The effect of vitamin C on upper respiratory~~  
53 ~~infections in adolescent swimmers: a randomized trial. *Eur J Pediatr* 2011;170:59-63.~~  
54 ~~doi:10.1007/s00431-010-1270-z~~  
55  
56  
57  
58  
59  
60

1  
2  
3  
4  
5  
6  
7  
8  
9  
10  
11  
12  
13  
14  
15  
16  
17  
18  
19  
20  
21  
22  
23  
24  
25  
26  
27  
28  
29  
30  
31  
32  
33  
34  
35  
36  
37  
38  
39  
40  
41  
42  
43  
44  
45  
46  
47  
48  
49  
50  
51  
52  
53  
54  
55  
56  
57  
58  
59  
60

289 Hathcock JN, Azzi A, Blumberg J, et al. Vitamins E and C are safe across a broad range of intakes. Am J Clin Nutr 2005;81:736-745.

For peer review only

1  
2  
3  
4  
5  
6  
7  
8  
9  
10  
11  
12  
13  
14  
15  
16  
17  
18  
19  
20  
21  
22  
23  
24  
25  
26  
27  
28  
29  
30  
31  
32  
33  
34  
35  
36  
37  
38  
39  
40  
41  
42  
43  
44  
45  
46  
47  
48  
49  
50  
51  
52  
53  
54  
55  
56  
57  
58  
59  
60

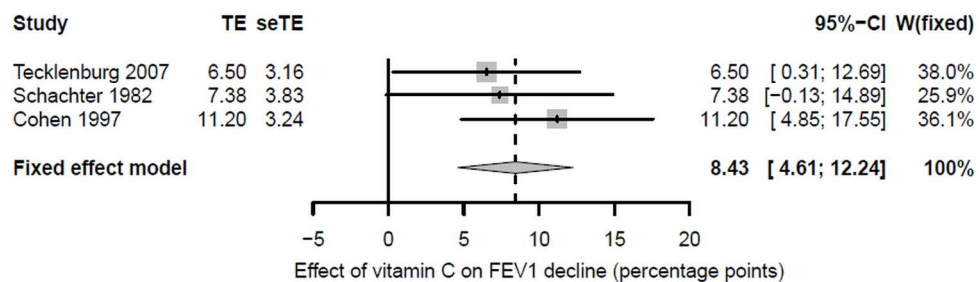

297x90mm (300 x 300 DPI)

peer review only

1  
2  
3  
4  
5  
6  
7  
8  
9  
10  
11  
12  
13  
14  
15  
16  
17  
18  
19  
20  
21  
22  
23  
24  
25  
26  
27  
28  
29  
30  
31  
32  
33  
34  
35  
36  
37  
38  
39  
40  
41  
42  
43  
44  
45  
46  
47  
48  
49  
50  
51  
52  
53  
54  
55  
56  
57  
58  
59  
60

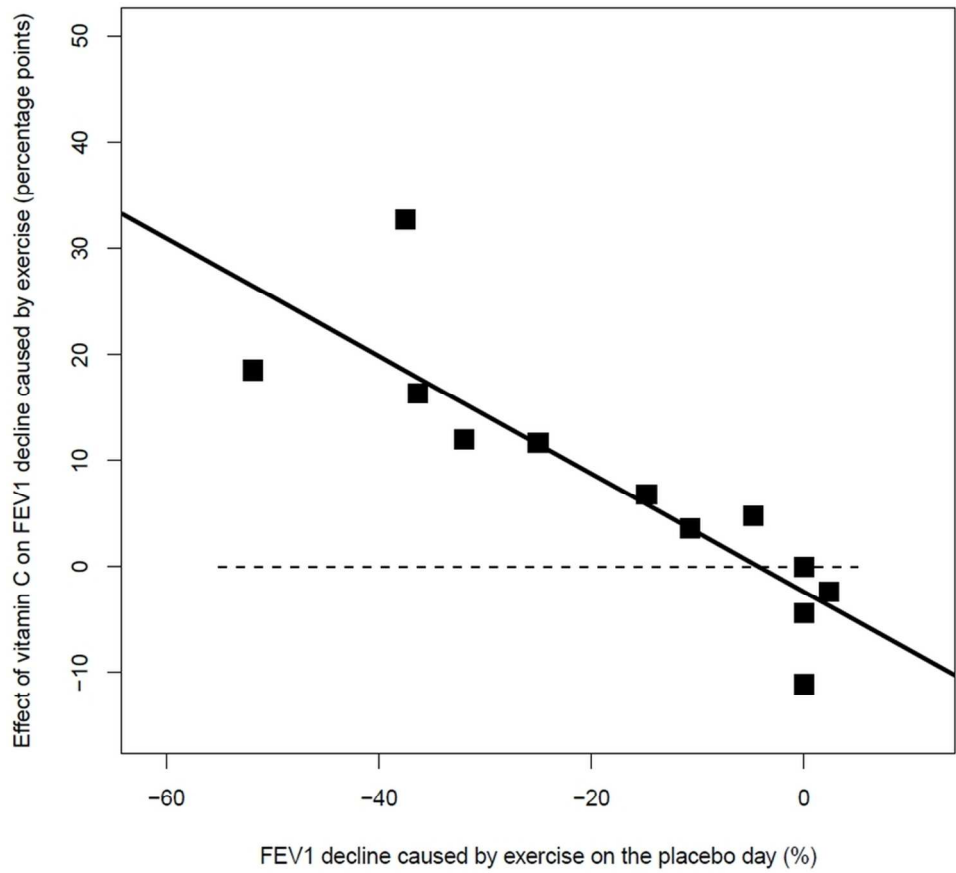

90x90mm (300 x 300 DPI)

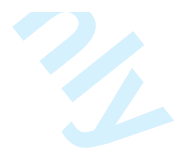

1  
2  
3  
4  
5  
6  
7  
8  
9  
10  
11  
12  
13  
14  
15  
16  
17  
18  
19  
20  
21  
22  
23  
24  
25  
26  
27  
28  
29  
30  
31  
32  
33  
34  
35  
36  
37  
38  
39  
40  
41  
42  
43  
44  
45  
46  
47  
48  
49  
50  
51  
52  
53  
54  
55  
56  
57  
58  
59  
60

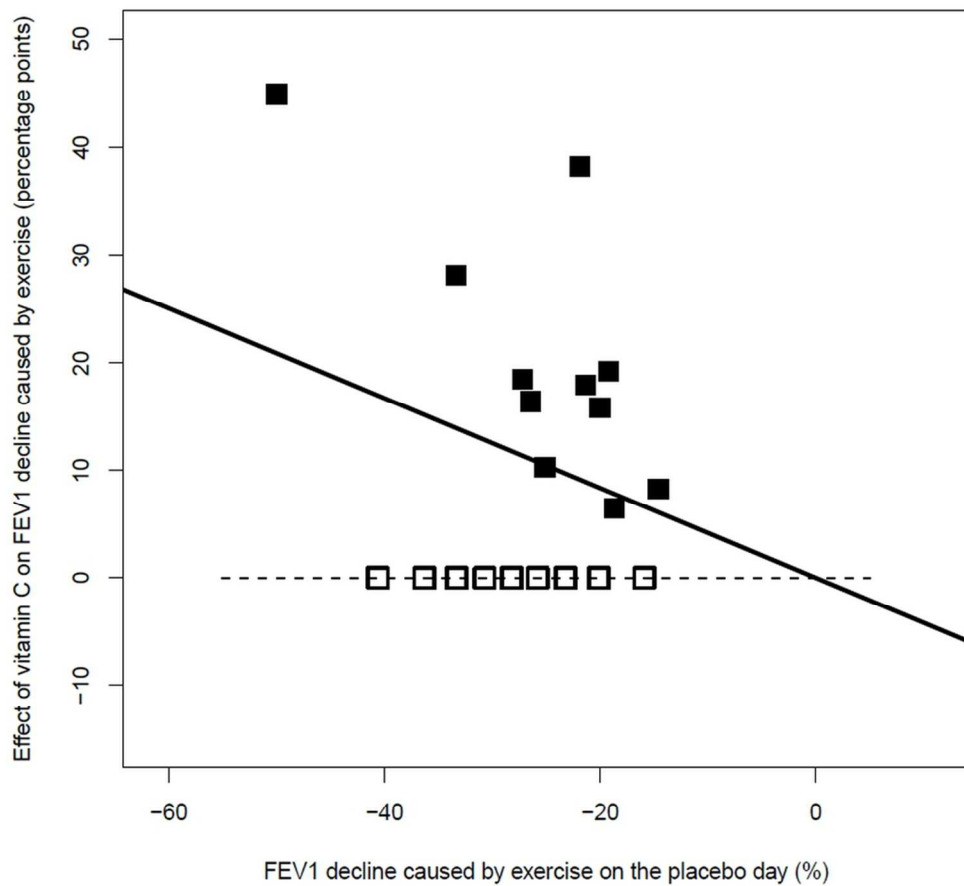

90x90mm (300 x 300 DPI)

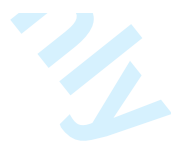



1  
2  
3  
4  
5  
6  
7  
8  
9  
10  
11  
12  
13  
14  
15  
16  
17  
18  
19  
20  
21  
22  
23  
24  
25  
26  
27  
28  
29  
30  
31  
32  
33  
34  
35  
36  
37  
38  
39  
40  
41  
42  
43  
44  
45  
46  
47  
48  
49  
50  
51  
52  
53  
54  
55  
56  
57  
58  
59  
60

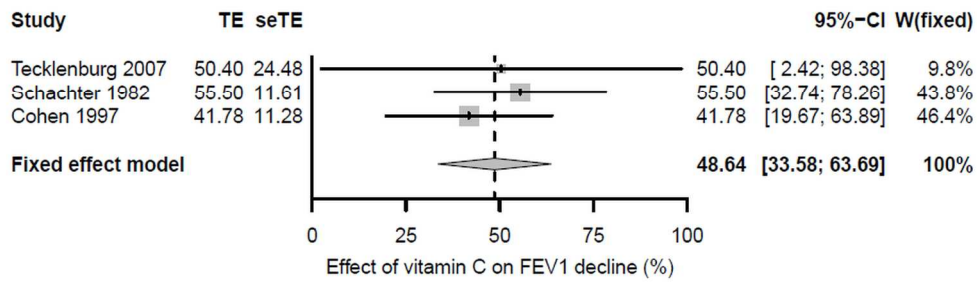

297x90mm (300 x 300 DPI)

peer review only

Supplementary file 1

Vitamin C may alleviate exercise-induced bronchoconstriction: a meta-analysis  
Harri Hemilä

Flow diagram of the literature search 12 Feb 2013

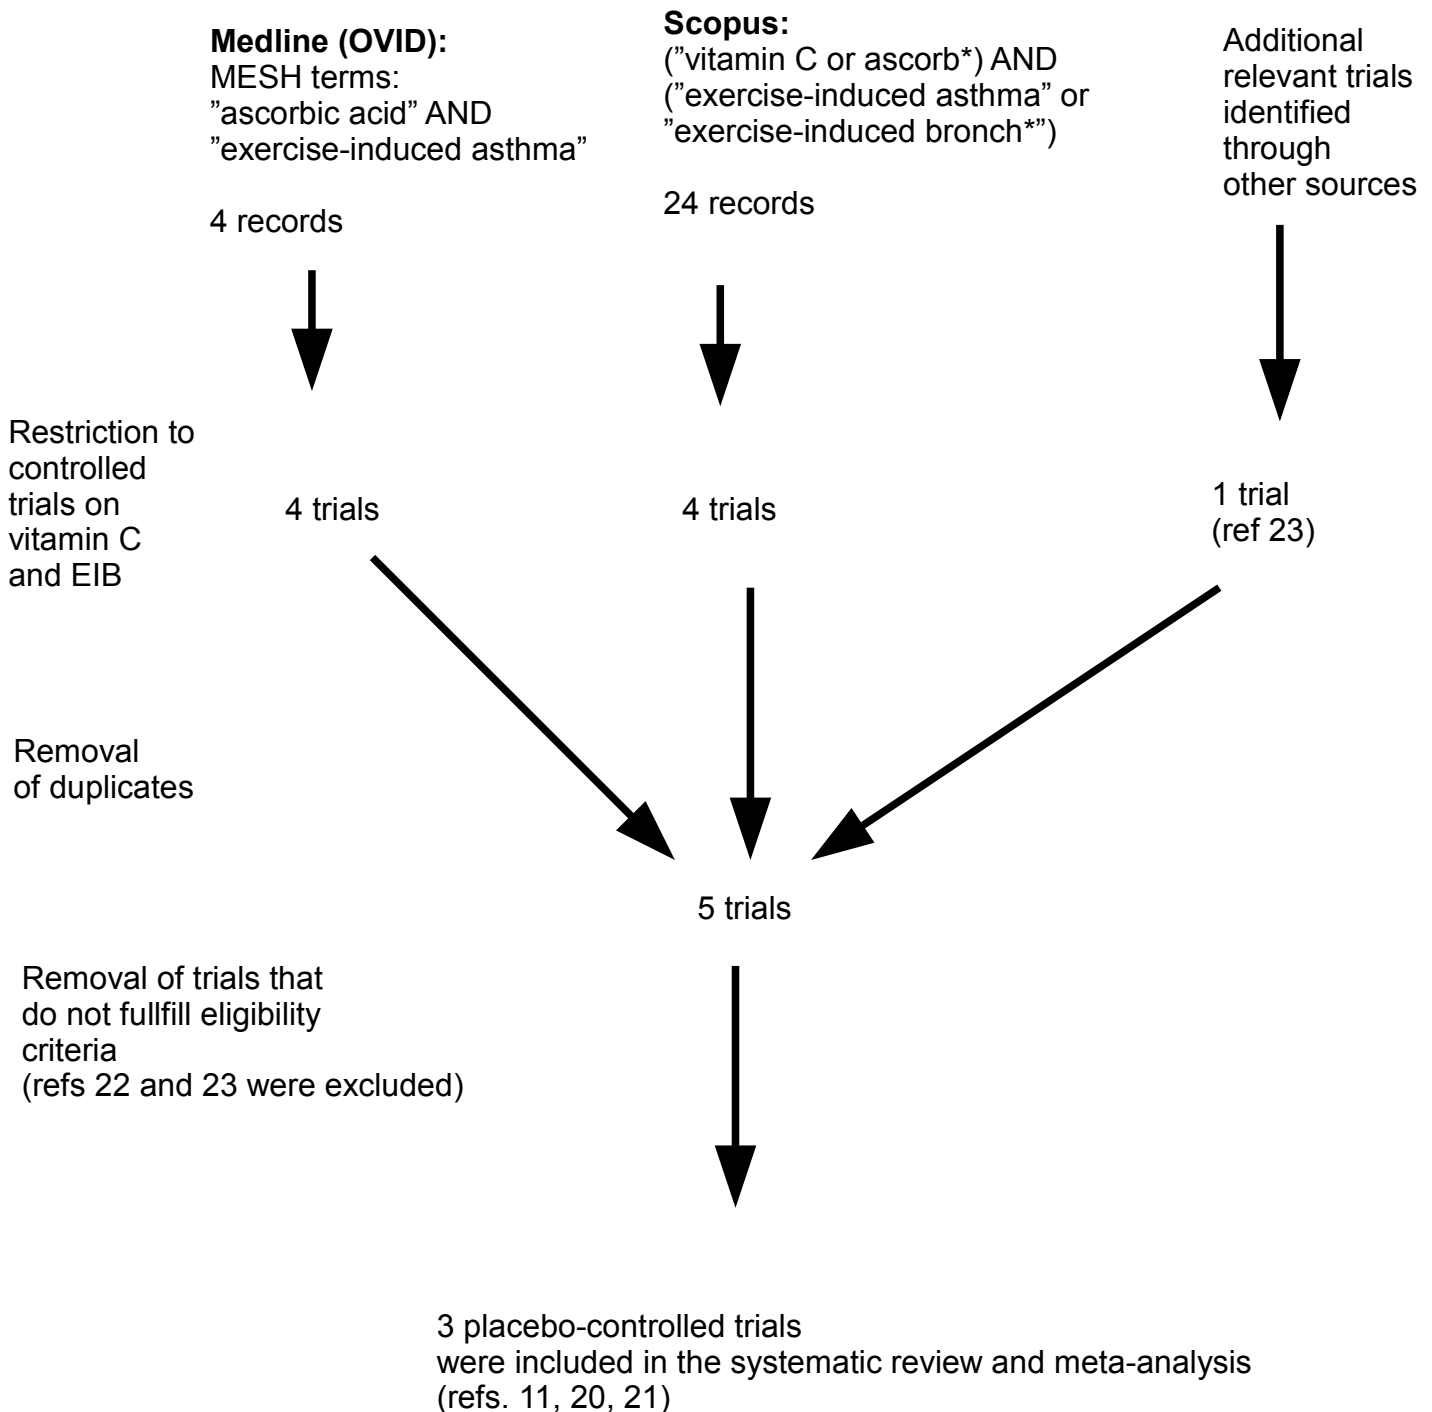

1  
2  
3  
4  
5  
6  
7  
8 **Supplementary file 2**

9  
10  
11 **Vitamin C may alleviate exercise-induced bronchoconstriction: a meta-analysis**

12  
13  
14  
15 Harri Hemilä  
16 Department of Public Health  
17 University of Helsinki  
18 Helsinki  
19 Finland  
20 harri.hemila@helsinki.fi  
21 <http://www.mv.helsinki.fi/home/hemila/>  
22  
23

24  
25 May 7, 2013  
26  
27  
28  
29  
30  
31  
32  
33  
34  
35  
36  
37  
38  
39  
40  
41  
42  
43  
44  
45

Harri Hemilä 2013

**Cohen 1997 2x2**      **Calculation of the P-value for the vitamin C effect on the occurrence of EIB after exercise session**

1  
2  
3  
4  
5 <http://www.ncbi.nlm.nih.gov/pubmed/9111435>

6 <http://dx.doi.org/10.1001/archpedi.1997.02170410041005>

7 Fig 2 data, see:

8 <http://www.mv.helsinki.fi/home/hemila/A/Cohen.htm>

9  
10 Cohen studied 20 participants who suffered from EIB, which was the inclusion criterion.

11 EIB was defined as post-exercise FEV1 decline of "at least 15%".

12 Cohen reported the number of participants who suffered from EIB after the exercise session on both vitamin C and placebo days.

13 This secondary outcome does not need any imputations, since there are data for all participants (Cohen's Fig. 2).

14 The following change to Fig. 2 data was made:

15 Cohen's Table 2 describes that, on the vitamin C day, patient #10 had post-exercise FEV1 decline of 15% (accurately 14.81%) and should be classified as EIB.

16 Thus, on the placebo day, all 20 participants suffered from EIB (FEV1 decline "at least 15%") (20-0).

17 With the above correction, on the vitamin C day, 10 participants suffered from EIB (FEV1 decline "at least 15%") and 10 did not (10-10).

18 The P-value, and the RR and its 95%CI can be calculated for the effect of vitamin C on the occurrence of EIB after exercise.

19 There are many ways to calculate P-values for 2x2 tables, see e.g. Lydersen et al.:

20 <http://www.ncbi.nlm.nih.gov/pubmed/19170020>

21 The above paper by Lydersen et al shows that the Fisher exact test is too conservative (too large P-values) and the paper strongly discourages its use.

22 Instead the above paper encourages the use of the mid-P modification of the Fisher test.

23  
24 For the Cohen 2x2 table (20-0 vs 10-10):

Mid-P(1-tail) = 0.00011

Mid-P(2-tail) = 0.00022

25  
26  
27 However, mid-P does not take into account that all participants suffered from EIB, which was an inclusion criterion.

28 If this is taken into account, a still smaller P value is obtained, see bottom of this sheet

29  
30 That approach gives:

P(1-tail) = 0.00001

P(2-tail) = 0.00002

1  
2  
3  
4  
5  
6  
7  
8  
9  
10  
11  
12  
13  
14  
15  
16  
17  
18  
19  
20  
21  
22  
23  
24  
25  
26  
27  
28  
29  
30  
31  
32  
33  
34  
35  
36  
37  
38  
39  
40  
41  
42  
43  
44  
45  
46  
47  
48  
49

**Calculation of the 95% CI for the Cohen 2x2 table by the Agresti-Caffo -method**

For the calculation formulas, see Fagerland et al. 2011:  
<http://www.ncbi.nlm.nih.gov/pubmed/21996567>

|                      |             |             |                      |               |
|----------------------|-------------|-------------|----------------------|---------------|
|                      | Vit C day   | Placebo day |                      |               |
| EIB cases            | 10          | 20          | Percentage point     |               |
| All participants     | 20          | 20          | Difference           |               |
| Percentage           | 50%         | 100%        | <b>-50%</b>          |               |
| <br>                 |             |             |                      |               |
| <b>Adjusted</b>      | Vit C day   | Placebo day | Vit C day            | Placebo day   |
|                      |             |             | p2                   | p1            |
| EIB cases            | 11          | 21          | p= 0.50              | 0.95          |
| All participants (n) | 22          | 22          | (1-p)= 0.50          | 0.05          |
|                      |             |             | p*(1-p)= 0.25        | 0.04          |
|                      |             |             | p*(1-p)/n= 0.01136   | 0.00197       |
|                      |             |             | sum=                 | 0.0133        |
|                      |             |             | sqrt(sum)=           | 0.115         |
|                      |             |             | p1-p2 =              | -45%          |
|                      |             |             | z(P=0.025) =         | 1.96          |
| <br>                 |             |             |                      |               |
| <b>Estimate:</b>     | <b>-50%</b> |             | <b>Agresti-Caffo</b> | <b>Low</b>    |
|                      |             |             | <b>95% CI:</b>       | <b>-68.1%</b> |
|                      |             |             |                      | <b>High</b>   |
|                      |             |             |                      | <b>-22.8%</b> |

Harri Hemilä 2013

**Calculating a more realistic P-value for the Cohen 2x2 table, taking into account that all participants suffered from EIB**

Given that all of Cohen's participants were selected as EIB cases, the mid-P value is conservative.

The approach below describes a more realistic, but more complex, calculation for the P-value of the observed 20-0 vs 10-10 difference.

Only the mid-P value is reported in the meta-analysis of vitamin C and EIB, but this calculation below shows that the mid-P is conservative.

Some characteristics and diseases are permanent and can be accurately diagnosed, e.g. sex and many genetic diseases.

However, EIB is not permanent nor highly accurate.

Cohen defined EIB as a decline of "at least 15%" in FEV1 because of exercise.

Because of the selection, it is not surprising that all 20 participants had EIB response also on the placebo day.

Nevertheless, this does not mean that the initial EIB diagnosis was 100% accurate and that EIB was a permanent characteristic of the participants.

Let us assume that 95% of the selected participants had EIB on a second exercise test.

If  $P(\text{rediagnosis}) = 0.95$ , then a series of repeated 20 EIB findings on the placebo day is highly probable:

$$P(20 \text{ EIB cases; 1-tail}) = 0.36$$

Nevertheless, such a high probability for a rediagnosis (95%) seems unrealistic.

Let us assume a lower accuracy so that on average 75% of participants had EIB on the second exercise test.

If  $P(\text{rediagnosis}) = 0.75$ , then a series of repeated 20 EIB findings on the placebo day is highly improbable:

$$P(20 \text{ EIB cases; 1-tail}) = 0.003$$

If  $P(\text{rediagnosis})$  is lower than 75%, the probability for observing 20 EIB cases on the placebo day becomes still more and more unlikely.

However, given that all 20 participants were selected as EIB cases, the probability that all of them had EIB on the placebo day cannot be very low.

Between the above extreme values for  $P(\text{rediagnosis})$ , there are values that give reasonable basis for estimating the P-value for the observation 20-0 vs 10-10 .

1  
2  
3  
4  
5  
6  
7  
8  
9  
10  
11  
12  
13  
14  
15  
16  
17  
18  
19  
20  
21  
22  
23  
24  
25  
26  
27  
28  
29  
30  
31  
32  
33  
34  
35  
36  
37  
38  
39  
40  
41  
42  
43  
44  
45  
46  
47  
48  
49

Below, a set of P(rediagnosis) values are selected,  
 and the calculation gives the probability of getting (on the assumption that vitamin C and placebo do not differ):  
 a) the 20 EIB observations on the placebo day  
 b) the 10-10 split on the vitamin C day (with its tail: 9-11 and 8-12 etc.)  
 c) the combined probability for 20-0 and 10-10 on the placebo and vitamin C days, respectively.

| Single person probability for being re-diagnosed as an EIB case on a second test | Placebo day<br>Probability for the observation<br>20 EIB + 0 No-EIB | Vit C day<br>Probability for the observation<br>10 EIB + 10 No-EIB | For the binomial distribution:                             |                      |
|----------------------------------------------------------------------------------|---------------------------------------------------------------------|--------------------------------------------------------------------|------------------------------------------------------------|----------------------|
|                                                                                  |                                                                     |                                                                    | 20                                                         | No. Participants     |
|                                                                                  |                                                                     |                                                                    | 10                                                         | No. EIB on vit C day |
| <b>P(rediagnosis)</b><br>Pr                                                      | <b>P(plac day, 1-t)</b><br>[= Pr exp(20)]                           | <b>P(vitC day, 1-t)</b><br>Binomial with the tail                  | <b>2 x 2 table</b><br>P(total; 1-tail) = P(plac) * P(vitC) |                      |
| <b>0.95</b>                                                                      | <b>0.36</b>                                                         | 0.00000001                                                         | 0.000000004                                                |                      |
| 0.90                                                                             | 0.12                                                                | 0.000007                                                           | 0.0000009                                                  |                      |
| <b>0.85</b>                                                                      | <b>0.039</b>                                                        | 0.000248                                                           | <b>0.0000096</b>                                           |                      |
| 0.80                                                                             | 0.012                                                               | 0.0026                                                             | 0.000030                                                   |                      |
| <b>0.75</b>                                                                      | <b>0.0032</b>                                                       | 0.014                                                              | <b>0.000044</b>                                            |                      |

Assuming P(rediagnosis) = 0.95 makes the placebo day observation probable, however the vitamin C day observation and the combined observation would be extremely unlikely. Thus, if 0.95 is assumed, then the evidence of vitamin C effect is very strong (very low P)

Assuming P(rediagnosis) = 0.75 makes the vitamin C day observation more likely, however the placebo day observation would become highly unlikely (not reasonable given that all had EIB). Furthermore, a higher P-value for the vitamin C day than for the placebo day is not reasonable (all had EIB) The resulting combined P-value is quite close to the mid-P shown above.

Assuming P(rediagnosis) = 0.85 makes the placebo day observation marginally probable (P = 0.04). Thus, 0.85 is a reasonable assumption. With this assumption, the combined P is a magnitude smaller than the mid-P shown above.

**Cohen 1997 Imputation**

<http://www.ncbi.nlm.nih.gov/pubmed/9111435>

<http://dx.doi.org/10.1001/archpedi.1997.02170410041005>

Table 1 and Table 2, see:

<http://www.mv.helsinki.fi/home/hemila/A/Cohen.htm>

On their Table 2, Cohen reported the post-exercise FEV1 decline values for 11 participants on the vitamin C and placebo days. The individual level differences between the vitamin C and placebo days can thus be calculated for these 11 participants. Similar data is not available for the remaining 9 participants. To include the Cohen study in the meta-analysis, the conservative “no vitamin C effect” was imputed to 9 participants with missing data.

**Imputing “no vitamin C effect” for the 9 participants with missing data**

| Patient             | Reported FEV1 decline                                                    |            | Treatment effect<br>in percentage points | TE |                                                                                                                                                          |
|---------------------|--------------------------------------------------------------------------|------------|------------------------------------------|----|----------------------------------------------------------------------------------------------------------------------------------------------------------|
|                     | Placebo day                                                              | Vit C day  |                                          |    |                                                                                                                                                          |
| <b>Reported</b>     | <b>(%)</b>                                                               | <b>(%)</b> |                                          |    |                                                                                                                                                          |
| 1                   | -26                                                                      | -10        | 16                                       |    | <b>For the 11 participants:</b><br>Mean = 20.36<br>SD = 12.01<br>SE = 3.62<br>t(10 df) = 5.62<br>P(1-tail) = 0.00011                                     |
| 2                   | -50                                                                      | -5         | 45                                       |    |                                                                                                                                                          |
| 3                   | -33                                                                      | -5         | 28                                       |    |                                                                                                                                                          |
| 4                   | -27                                                                      | -9         | 18                                       |    |                                                                                                                                                          |
| 5                   | -21                                                                      | -3         | 18                                       |    |                                                                                                                                                          |
| 6                   | -15                                                                      | -6         | 9                                        |    |                                                                                                                                                          |
| 7                   | -19                                                                      | 0          | 19                                       |    |                                                                                                                                                          |
| 8                   | -22                                                                      | 16         | 38                                       |    |                                                                                                                                                          |
| 9                   | -20                                                                      | -4         | 16                                       |    |                                                                                                                                                          |
| 10                  | -25                                                                      | -15        | 10                                       |    |                                                                                                                                                          |
| 11                  | -19                                                                      | -12        | 7                                        |    |                                                                                                                                                          |
| <b>Imputed data</b> | <b>See below for the imputation of placebo day v Imputed “no effect”</b> |            |                                          |    |                                                                                                                                                          |
| 12                  | -15.9%                                                                   | -15.9%     | 0                                        |    | <b>For all the 20 participants:</b><br>Mean = 11.20 >> sheet Fig. 1<br>SD = 13.56 >> sheet Fig. 1<br>SE = 3.03<br>t(19 df) = 3.69<br>P(1-tail) = 0.00077 |
| 13                  | -20.1%                                                                   | -20.1%     | 0                                        |    |                                                                                                                                                          |
| 14                  | -23.2%                                                                   | -23.2%     | 0                                        |    |                                                                                                                                                          |
| 15                  | -25.8%                                                                   | -25.8%     | 0                                        |    |                                                                                                                                                          |
| 16                  | -28.2%                                                                   | -28.2%     | 0                                        |    |                                                                                                                                                          |
| 17                  | -30.7%                                                                   | -30.7%     | 0                                        |    |                                                                                                                                                          |
| 18                  | -33.3%                                                                   | -33.3%     | 0                                        |    |                                                                                                                                                          |
| 19                  | -36.4%                                                                   | -36.4%     | 0                                        |    |                                                                                                                                                          |
| 20                  | -40.6%                                                                   | -40.6%     | 0                                        |    |                                                                                                                                                          |



1  
2 **Imputation of the placebo-day FEV1 decline value:**

3  
4 In Table 1, Cohen reported the mean pre- and post-exercise FEV1 values (L) for the placebo day for all 20 participants  
5 The mean FEV1 values for all the 20 participants can be used to calculate the mean FEV1 decline on the placebo day for the 9 participants with missing  
6 This calculation is done to reach a realistic horizontal spread to Fig. 3 for the 9 participants with the "no vitamin C effect" imputation

| Participant number  | Before Exercise (L) | After Exercise (L) | Reported Decrease |
|---------------------|---------------------|--------------------|-------------------|
| 1                   | 1.55                | 1.14               | -26%              |
| 2                   | 1.54                | 0.77               | -50%              |
| 3                   | 2.22                | 1.48               | -33%              |
| 4                   | 1.95                | 1.42               | -27%              |
| 5                   | 2.44                | 1.92               | -21%              |
| 6                   | 2.04                | 1.75               | -15%              |
| 7                   | 2.55                | 2.06               | -19%              |
| 8                   | 1.05                | 0.82               | -22%              |
| 9                   | 1.10                | 0.88               | -20%              |
| 10                  | 3.82                | 2.86               | -25%              |
| 11                  | 3.91                | 3.18               | -19%              |
| <b>Mean (1-11):</b> | <b>2.198</b>        | <b>1.661</b>       |                   |

22 **Mean (all 20): 2.36** < Cohen Table 1 reported > **1.74**

25 **Mean (12-20): 2.558** **The 9 participants with no data**  
< must have these means > **1.836**

| Imputed | Thus, the mean decline for the 9 imputed must be = | Imputed | P-value |                                                                                                                                                                                                                                                                                     |
|---------|----------------------------------------------------|---------|---------|-------------------------------------------------------------------------------------------------------------------------------------------------------------------------------------------------------------------------------------------------------------------------------------|
| 12      | -28.2%                                             | -15.9%  | 0.9     | For the imputed 9 cases, the same SD is assumed as observed for the 11 published cases. Generation of the normal distribution with mean = -28.2% and SD = 9.6% for the 9 participants with missing data is done with the help of these equally P-values using the NORMINV function. |
| 13      | ( = 1.836 / 2.558 - 1 )                            | -20.1%  | 0.8     |                                                                                                                                                                                                                                                                                     |
| 14      |                                                    | -23.2%  | 0.7     |                                                                                                                                                                                                                                                                                     |
| 15      |                                                    | -25.8%  | 0.6     |                                                                                                                                                                                                                                                                                     |
| 16      |                                                    | -28.2%  | 0.5     |                                                                                                                                                                                                                                                                                     |
| 17      |                                                    | -30.7%  | 0.4     |                                                                                                                                                                                                                                                                                     |
| 18      |                                                    | -33.3%  | 0.3     |                                                                                                                                                                                                                                                                                     |
| 19      |                                                    | -36.4%  | 0.2     |                                                                                                                                                                                                                                                                                     |
| 20      |                                                    | -40.6%  | 0.1     |                                                                                                                                                                                                                                                                                     |

24 Below: these 9 imputed FEV1 decrease values are used in Fig. 3 to show the horizontal spread of the participants with the missing values

Harri Hemilä 2013

**Cohen 1997 linear model data**

Table 2, see:

<http://www.mv.helsinki.fi/home/hemila/A/Cohen.htm>

Here are the accurate data from Table 2 and the imputed values (see the previous sheets) for the linear model

**In Fig. 3, TE is modeled with C (Placebo day FEV1 decline) as the explanatory variable**

| Placebo day FEV1   |                   |                   | Vitamin C day FEV1 |                   |                   | Vitamin C<br>effect on<br>FEV1 decline |
|--------------------|-------------------|-------------------|--------------------|-------------------|-------------------|----------------------------------------|
| Before<br>Exercise | After<br>Exercise | Difference<br>(%) | Before<br>Exercise | After<br>Exercise | Difference<br>(%) |                                        |
|                    |                   | <b>C</b>          |                    |                   |                   | <b>TE</b>                              |
| 1.55               | 1.14              | -26.45            | 1.59               | 1.43              | -10.06            | 16.39                                  |
| 1.54               | 0.77              | -50.00            | 1.57               | 1.49              | -5.10             | 44.90                                  |
| 2.22               | 1.48              | -33.33            | 2.11               | 2.00              | -5.21             | 28.12                                  |
| 1.95               | 1.42              | -27.18            | 1.73               | 1.58              | -8.67             | 18.51                                  |
| 2.44               | 1.92              | -21.31            | 2.35               | 2.27              | -3.40             | 17.91                                  |
| 2.04               | 1.75              | -14.58            | 1.75               | 1.64              | -6.29             | 8.29                                   |
| 2.55               | 2.06              | -19.22            | 2.48               | 2.48              | 0.00              | 19.22                                  |
| 1.05               | 0.82              | -21.90            | 0.92               | 1.07              | 16.30             | 38.21                                  |
| 1.10               | 0.88              | -20.00            | 0.96               | 0.92              | -4.17             | 15.83                                  |
| 3.82               | 2.86              | -25.13            | 3.51               | 2.99              | -14.81            | 10.32                                  |
| 3.91               | 3.18              | -18.67            | 3.86               | 3.39              | -12.18            | 6.49                                   |
| NA                 | NA                | -40.60            | NA                 | NA                | -40.6             | 0.00                                   |
| NA                 | NA                | -36.30            | NA                 | NA                | -36.3             | 0.00                                   |
| NA                 | NA                | -33.30            | NA                 | NA                | -33.3             | 0.00                                   |
| NA                 | NA                | -30.70            | NA                 | NA                | -30.7             | 0.00                                   |
| NA                 | NA                | -28.20            | NA                 | NA                | -28.2             | 0.00                                   |
| NA                 | NA                | -25.80            | NA                 | NA                | -25.8             | 0.00                                   |
| NA                 | NA                | -23.20            | NA                 | NA                | -23.2             | 0.00                                   |
| NA                 | NA                | -20.10            | NA                 | NA                | -20.1             | 0.00                                   |
| NA                 | NA                | -15.90            | NA                 | NA                | -15.9             | 0.00                                   |

Schachter and Schlesinger 1982

http://www.ncbi.nlm.nih.gov/pubmed/7114587

Tables III and V, see:

http://www.mv.helsinki.fi/home/hemila/A/Schachter.htm

Schachter (1982) Table III gives the post-exercise FEV1 decline on the absolute scale (L): A and

Schachter (1982) Table V gives the baseline FEV1 values before exercise (L) on placebo and vitamin C days: B and

Percentage decline in FEV1 is calculated as A/B and D/E

The percentage point effect of vitamin C is calculated as: F - C

In Fig. 2, TE is modeled with C as the explanatory variable

| No.         | Placebo day                          |                                         |                                 | Vitamin C day                        |                                         |                                 | Vit C and Placebo Difference<br>in FEV1 decline<br>(in percentage points)<br>Treatment effect (TE) |
|-------------|--------------------------------------|-----------------------------------------|---------------------------------|--------------------------------------|-----------------------------------------|---------------------------------|----------------------------------------------------------------------------------------------------|
|             | Change in<br>FEV1<br>(L)<br><b>A</b> | pre-exercise<br>FEV1<br>(L)<br><b>B</b> | Change<br>(%)<br><b>C = A/B</b> | Change in<br>FEV1<br>(L)<br><b>D</b> | pre-exercise<br>FEV1<br>(L)<br><b>E</b> | Change<br>(%)<br><b>F = D/E</b> |                                                                                                    |
| 1           | -0.3                                 | 2.8                                     | -10.71%                         | -0.2                                 | 2.8                                     | -7.14%                          | 3.57%                                                                                              |
| 2           | -0.7                                 | 2.8                                     | -25.00%                         | -0.4                                 | 3.0                                     | -13.33%                         | 11.67%                                                                                             |
| 3           | -0.8                                 | 2.2                                     | -36.36%                         | -0.4                                 | 2.0                                     | -20.00%                         | 16.36%                                                                                             |
| 4           | -0.9                                 | 2.4                                     | -37.50%                         | -0.1                                 | 2.1                                     | -4.76%                          | 32.74%                                                                                             |
| 5           | 0.0                                  | 2.9                                     | 0.00%                           | 0.0                                  | 2.4                                     | 0.00%                           | 0.00%                                                                                              |
| 6           | 0.0                                  | 2.8                                     | 0.00%                           | -0.3                                 | 2.7                                     | -11.11%                         | -11.11%                                                                                            |
| 7           | 0.0                                  | 2.9                                     | 0.00%                           | -0.1                                 | 2.3                                     | -4.35%                          | -4.35%                                                                                             |
| 8           | -0.1                                 | 2.1                                     | -4.76%                          | 0.0                                  | 1.8                                     | 0.00%                           | 4.76%                                                                                              |
| 9           | -0.4                                 | 2.7                                     | -14.81%                         | -0.2                                 | 2.5                                     | -8.00%                          | 6.81%                                                                                              |
| 10          | 0.1                                  | 4.2                                     | 2.38%                           | 0.0                                  | 4.4                                     | 0.00%                           | -2.38%                                                                                             |
| 11          | -1.4                                 | 2.7                                     | -51.85%                         | -0.7                                 | 2.1                                     | -33.33%                         | 18.52%                                                                                             |
| 12          | -0.8                                 | 2.5                                     | -32.00%                         | -0.5                                 | 2.5                                     | -20.00%                         | 12.00%                                                                                             |
| <b>Mean</b> | -0.442                               | 2.750                                   | -17.55%                         | -0.242                               | 2.550                                   | -10.17%                         | <b>7.38%</b>                                                                                       |
| <b>SD</b>   | 0.474                                | 0.528                                   |                                 | 0.223                                | 0.679                                   |                                 | <b>11.83%</b>                                                                                      |
| <b>SE</b>   | 0.137                                | 0.153                                   |                                 | 0.065                                | 0.196                                   |                                 | 3.41%                                                                                              |

>> sheet Fig.

>> sheet Fig.

Harri Hemilä 2013

**Tecklenburg 2007**<http://www.ncbi.nlm.nih.gov/pubmed/17412579><http://dx.doi.org/10.1016/j.rmed.2007.02.014>**Post-exercise FEV1 decline caused by exercise**

Text of Sandra Lunds email Jan 7, 2010:

"Here is the data you requested.  
The average difference score was +6.5 with a standard dev. Of 7.4."

|                      | Percentage<br>points | Relative effect of vitamin C:<br>(division by 12.90) |
|----------------------|----------------------|------------------------------------------------------|
| Mean difference      | 6.5 >> sheet Fig. 1  | 50.39% >> sheet Fig. 4                               |
| SD(paired)           | 7.4 >> sheet Fig. 1  | 57.36% >> sheet Fig. 4                               |
| Placebo FEV decline: | 12.90                | 100%                                                 |

1  
2  
3  
4  
5  
6  
7  
8  
9  
10  
11  
12  
13  
14  
15  
16  
17  
18  
19  
20  
21  
22  
23  
24  
25  
26  
27  
28  
29  
30  
31  
32  
33  
34  
35  
36  
37  
38  
39  
40  
41  
42  
43  
44  
45  
46  
47  
48  
49

**Fig 1: Meta-analysis of the vitamin C percentage point effect on FEV1 decline caused by exercise**  
Calculation of the SE adjustment needed for the meta-analysis

In small studies, the t-score of the t-distribution is used for the calculation of the P and 95%CI, since it takes into account the study :  
In small samples, the 95% limits are calculated as Mean ± t(P=0.05; df) × SE. Thus, for small samples, the CI is calculated from "t".  
The standard meta-analysis programs assume large sample for inverse variance pooling, which means using "z".  
Therefore the SE(z) value corresponding to the large sample is calculated on the right.  
In the "metagen" program, this SE(z) value gives a correct CI ranges, those below, in the forest plot of Fig. 1.  
The correct SE(c) does not give the correct 95%CI limits in the standard meta-analysis programs.

|                 |                   | Effect of vitamin C on<br>Reduction in post-exercise<br>FEV1 decline<br>(percentage points) |                |       |       |      |           |             |        |      |       |
|-----------------|-------------------|---------------------------------------------------------------------------------------------|----------------|-------|-------|------|-----------|-------------|--------|------|-------|
|                 |                   | df                                                                                          | Mean<br>effect | SD    | SE(c) | t    | P(2-tail) | :(P=.05;df) | 95% CI |      | SE(z) |
| All data paired | No of<br>Particip |                                                                                             |                |       |       |      |           |             | Low    | High |       |
|                 | Tecklenburg 2002  | 7                                                                                           | 6.5            | 7.4   | 2.62  | 2.48 | 0.0419    | 2.36        | 0.31   | 12.7 | 3.16  |
|                 | Schachter 1982    | 11                                                                                          | 7.38           | 11.83 | 3.41  | 2.16 | 0.0535    | 2.20        | -0.13  | 14.9 | 3.83  |
|                 | Cohen 1997        | 19                                                                                          | 11.20          | 13.56 | 3.03  | 3.69 | 0.0015    | 2.09        | 4.85   | 17.5 | 3.24  |

**Fig 4: Meta-analysis of the vitamin C relative effect on FEV1 changes caused by exercise**  
**Calculation of the SE adjustment needed for the meta-analysis**

In small studies, the t-score of the t-distribution is used for the calculation of the P and 95%CI, since it takes into account the study. In small samples, the 95% limits are calculated as  $\text{Mean} \pm t(P=0.05; df) \times \text{SE}$ . Thus, for small samples, the CI is calculated from "t". The standard meta-analysis programs assume large sample for inverse variance pooling, which means using "z". Therefore the SE(z) value corresponding to the large sample is calculated on the right. In the "metagen" program, this SE(z) value gives a correct CI ranges, those below, in the forest plot of Fig. 4. The correct SE(c) does not give the correct 95%CI limits in the standard meta-analysis programs.

| All data paired | No of Particip | df | Effect of vitamin C o               |       | SE(c) | t    | P(2-tail) | t(P=.05;df) | 95% CI |      | SE(z) |
|-----------------|----------------|----|-------------------------------------|-------|-------|------|-----------|-------------|--------|------|-------|
|                 |                |    | Reduction in post-exercise          |       |       |      |           |             | Low    | High |       |
|                 |                |    | FEV1 decline (relative effect in %) |       |       |      |           |             |        |      |       |
| Mean effect     | SD             |    |                                     |       |       |      |           |             |        |      |       |
| Tecklenburg 200 | 8              | 7  | 50.39                               | 57.36 | 20.28 | 2.48 | 0.0419    | 2.36        | 2.44   | 98.3 | 24.47 |
| Schachter 1982  | 12             | 10 | 55.50                               |       | 10.21 | 5.44 | 0.000287  | 2.23        | 32.75  | 78.2 | 11.61 |
| Cohen 1997      | 20             | 19 | 41.78                               |       | 10.56 | 3.96 | 0.000846  | 2.09        | 19.68  | 63.9 | 11.28 |

The mean effect and SE(c) values for Schachter and Cohen studies are from slopes in Figs. 2 and 3, see also Supplementary file. The relative effect mean and SD for the Tecklenburg data are the study mean values, see sheet "Tecklenburg 200".

1  
2  
3 **Supplementary file 3**  
4  
5

6 **Vitamin C may alleviate exercise-induced bronchoconstriction:**  
7 **a meta-analysis**  
8

9  
10 **R-program printouts (3 March 2013)**  
11

12  
13 Harri Hemilä  
14 Department of Public Health  
15 University of Helsinki  
16 Helsinki  
17 Finland  
18 [harri.hemila@helsinki.fi](mailto:harri.hemila@helsinki.fi)  
19 <http://www.mv.helsinki.fi/home/hemila/>  
20  
21  
22

23 **Contents**  
24

25 Page  
26

- 27  
28  
29  
30 2 **Schachter**  
31 Data and the linear model with only the intercept (t-test)  
32 Calculation of the variables is shown in supplementary file 2  
33  
34  
35 3 **Schachter**  
36 Linear model with placebo-day FEV1 decline as the added explanatory variable  
37 Log likelihood test for comparing the two models for the Schachter data  
38  
39  
40 4 **Cohen**  
41 Data and the linear model  
42 Calculation of the variables is shown in supplementary file 2  
43  
44  
45 5 **Fig 1** meta-analysis and sensitivity analysis in which Cohen is excluded  
46  
47  
48 6 **Fig 4** meta-analysis  
49  
50  
51  
52  
53  
54  
55  
56  
57  
58  
59  
60

```

1
2 > Schachter
3   PL_FEV1_Diff VitC_Effect
4   1      -10.71      3.57
5   2      -25.00     11.67
6   3      -36.36     16.36
7   4      -37.50     32.74
8   5       0.00      0.00
9   6       0.00    -11.11
10  7       0.00     -4.35
11  8      -4.76      4.76
12  9     -14.81      6.81
13 10       2.38     -2.38
14 11     -51.85     18.52
15 12     -32.00     12.00
16
17
18
19
20
21 > LinearModel.10 <- lm(VitC_Effect ~ 1,      data=Schachter)
22
23 > summary(LinearModel.10)
24
25 Call:
26 lm(formula = VitC_Effect ~ 1, data = Schachter)
27
28 Residuals:
29      Min       1Q   Median       3Q      Max
30 -18.492  -7.978  -1.597   5.707  25.358
31
32 Coefficients:
33             Estimate Std. Error t value Pr(>|t|)
34 (Intercept)    7.383     3.414   2.162  0.0535
35 ---
36
37 Residual standard error: 11.83 on 11 degrees of freedom
38
39
40 > confint(LinearModel.10)
41             2.5 %    97.5 %
42 (Intercept) -0.1316784 14.89668
43
44
45
46
47
48
49
50
51
52
53
54
55
56
57
58
59
60

```



```

1
2 > LinearModel.11 <- lm(VitC_Effect ~ 1 + PL_FEV1_Diff, data=Schachter)
3
4 > summary(LinearModel.11)
5
6 Call:
7 lm(formula = VitC_Effect ~ 1 + PL_FEV1_Diff, data = Schachter)
8
9 Residuals:
10      Min       1Q   Median       3Q      Max
11 -8.7513 -2.3440  0.0687  1.5644 14.2852
12
13 Coefficients:
14             Estimate Std. Error t value Pr(>|t|)
15 (Intercept)  -2.3587     2.5400  -0.929  0.374966
16 PL_FEV1_Diff -0.5550     0.1021  -5.437  0.000286
17 ---
18
19 Residual standard error: 6.237 on 10 degrees of freedom
20 Multiple R-squared:  0.7472,    Adjusted R-squared:  0.7219
21 F-statistic: 29.56 on 1 and 10 DF,  p-value: 0.0002862
22
23
24 > confint(LinearModel.11)
25             2.5 %      97.5 %
26 (Intercept) -8.0182460  3.3008733
27 PL_FEV1_Diff -0.7825026 -0.3275514
28
29
30
31
32
33
34
35
36 > lrtest(LinearModel.10,LinearModel.11)
37 Likelihood ratio test
38
39 Model 1: VitC_Effect ~ 1
40 Model 2: VitC_Effect ~ 1 + PL_FEV1_Diff
41   #Df  LogLik Df  Chisq Pr(>Chisq)
42  1    2 -46.149
43  2    3 -37.899  1 16.502  4.861e-05
44 ---
45
46
47
48
49
50
51
52
53
54
55
56
57
58
59
60

```

```

1
2 > CohenPubImp
3   PL_FEV1_Diff VitC_Effect
4   1      -26.45      16.39
5   2      -50.00      44.90
6   3      -33.33      28.12
7   4      -27.18      18.51
8   5      -21.31      17.91
9   6      -14.58       8.29
10  7      -19.22      19.22
11  8      -21.90      38.21
12  9      -20.00      15.83
13 10      -25.13      10.32
14 11      -18.67       6.49
15 12      -40.60       0.00
16 13      -36.30       0.00
17 14      -33.30       0.00
18 15      -30.70       0.00
19 16      -28.20       0.00
20 17      -25.80       0.00
21 18      -23.20       0.00
22 19      -20.10       0.00
23 20      -15.90       0.00
24
25
26
27
28
29 > LinearModel.21 <- lm(VitC_Effect ~ 0 + PL_FEV1_Diff, data=CohenPubImp)
30
31 > summary(LinearModel.21)
32
33 Call:
34 lm(formula = VitC_Effect ~ 0 + PL_FEV1_Diff, data = CohenPubImp)
35
36 Residuals:
37     Min       1Q   Median       3Q      Max
38 -16.9609 -11.0288  -0.7439   7.8580  29.0611
39
40
41
42 Coefficients:
43             Estimate Std. Error t value Pr(>|t|)
44 PL_FEV1_Diff  -0.4178     0.1056  -3.955 0.000849
45 ---
46
47 Residual standard error: 13.2 on 19 degrees of freedom
48 Multiple R-squared:  0.4516,    Adjusted R-squared:  0.4227
49 F-statistic: 15.64 on 1 and 19 DF,  p-value: 0.0008485
50
51
52 > confint(LinearModel.21)
53             2.5 %      97.5 %
54 PL_FEV1_Diff -0.6388209 -0.1966937
55
56
57
58
59
60

```

```

1
2 > Fig_1
3   Mean   SE           Study
4 1  6.50 3.16 Tecklenburg 2007
5 2  7.38 3.83   Schachter 1982
6 3 11.20 3.24           Cohen 1997
7
8 > meta1<-metagen(Fig_1$Mean, Fig_1$SE, Fig_1$Study)
9
10 > meta1
11                                     95%-CI %W(fixed)
12 Tecklenburg 2007  6.50 [ 0.3065; 12.6935]      37.99
13 Schachter 1982   7.38 [-0.1267; 14.8867]      25.86
14 Cohen 1997      11.20 [ 4.8497; 17.5503]      36.14
15
16 Number of studies combined: k=3
17                                     95%-CI      z  p.value
18 Fixed effect model  8.4262 [4.6086; 12.2439] 4.326 < 0.0001
19
20 Quantifying heterogeneity:
21 tau^2 < 0.0001; H = 1 [1; 2.38]; I^2 = 0% [0%; 82.4%]
22
23 Test of heterogeneity:
24   Q d.f.  p.value
25  1.18    2    0.5546
26
27 Details on meta-analytical method:
28 - Inverse variance method
29 - DerSimonian-Laird estimator for tau^2
30
31
32
33
34 > Fig_1_Sens
35   Mean   SE           Study
36 1  6.50 3.16 Tecklenburg 2007
37 2  7.38 3.83   Schachter 1982
38
39 > meta1S<-metagen(Fig_1_Sens$Mean, Fig_1_Sens$SE, Fig_1_Sens$Study)
40
41 > meta1S
42                                     95%-CI %W(fixed)
43 Tecklenburg 2007  6.50 [ 0.3065; 12.6935]      59.5
44 Schachter 1982   7.38 [-0.1267; 14.8867]      40.5
45
46 Number of studies combined: k=2
47
48                                     95%-CI      z  p.value
49 Fixed effect model  6.8564 [2.0791; 11.6338] 2.8129  0.0049
50
51 Quantifying heterogeneity:
52 tau^2 < 0.0001; H = 1; I^2 = 0%
53
54 Test of heterogeneity:
55   Q d.f.  p.value
56  0.03    1    0.8593
57
58 Details on meta-analytical method:
59 - Inverse variance method
60 - DerSimonian-Laird estimator for tau^2

```

```

1
2 > Fig_4
3   Mean    SE      Study
4 1 50.40 24.48 Tecklenburg 2007
5 2 55.50 11.61  Schachter 1982
6 3 41.78 11.28      Cohen 1997
7
8 > meta4<-metagen(Fig_4$Mean, Fig_4$SE, Fig_4$Study)
9
10 > meta4
11                                     95%-CI %W(fixed)
12 Tecklenburg 2007 50.40 [ 2.4201; 98.3799]      9.85
13 Schachter 1982  55.50 [32.7448; 78.2552]     43.78
14 Cohen 1997     41.78 [19.6716; 63.8884]     46.38
15
16 Number of studies combined: k=3
17
18                                     95%-CI      z  p.value
19 Fixed effect model  48.635 [33.5792; 63.6908] 6.3313 < 0.0001
20
21 Quantifying heterogeneity:
22 tau^2 < 0.0001; H = 1 [1; 1.87]; I^2 = 0% [0%; 71.3%]
23
24 Test of heterogeneity:
25   Q d.f.  p.value
26  0.72   2   0.6962
27
28 Details on meta-analytical method:
29 - Inverse variance method
30 - DerSimonian-Laird estimator for tau^2
31
32
33
34
35
36
37
38
39
40
41
42
43
44
45
46
47
48
49
50
51
52
53
54
55
56
57
58
59
60

```

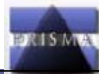

# PRISMA 2009 Checklist

| Section/topic                      | #  | Checklist item                                                                                                                                                                                                                                                                                              | Reported on page # |
|------------------------------------|----|-------------------------------------------------------------------------------------------------------------------------------------------------------------------------------------------------------------------------------------------------------------------------------------------------------------|--------------------|
| <b>TITLE</b>                       |    |                                                                                                                                                                                                                                                                                                             |                    |
| Title                              | 1  | Identify the report as a systematic review, meta-analysis, or both.                                                                                                                                                                                                                                         | 1                  |
| <b>ABSTRACT</b>                    |    |                                                                                                                                                                                                                                                                                                             |                    |
| Structured summary                 | 2  | Provide a structured summary including, as applicable: background; objectives; data sources; study eligibility criteria, participants, and interventions; study appraisal and synthesis methods; results; limitations; conclusions and implications of key findings; systematic review registration number. | 2                  |
| <b>INTRODUCTION</b>                |    |                                                                                                                                                                                                                                                                                                             |                    |
| Rationale                          | 3  | Describe the rationale for the review in the context of what is already known.                                                                                                                                                                                                                              | 4                  |
| Objectives                         | 4  | Provide an explicit statement of questions being addressed with reference to participants, interventions, comparisons, outcomes, and study design (PICOS).                                                                                                                                                  | 4-5                |
| <b>METHODS</b>                     |    |                                                                                                                                                                                                                                                                                                             |                    |
| Protocol and registration          | 5  | Indicate if a review protocol exists, if and where it can be accessed (e.g., Web address), and, if available, provide registration information including registration number.                                                                                                                               | no                 |
| Eligibility criteria               | 6  | Specify study characteristics (e.g., PICOS, length of follow-up) and report characteristics (e.g., years considered, language, publication status) used as criteria for eligibility, giving rationale.                                                                                                      | 6                  |
| Information sources                | 7  | Describe all information sources (e.g., databases with dates of coverage, contact with study authors to identify additional studies) in the search and date last searched.                                                                                                                                  | 7                  |
| Search                             | 8  | Present full electronic search strategy for at least one database, including any limits used, such that it could be repeated.                                                                                                                                                                               | 7                  |
| Study selection                    | 9  | State the process for selecting studies (i.e., screening, eligibility, included in systematic review, and, if applicable, included in the meta-analysis).                                                                                                                                                   | 7                  |
| Data collection process            | 10 | Describe method of data extraction from reports (e.g., piloted forms, independently, in duplicate) and any processes for obtaining and confirming data from investigators.                                                                                                                                  | 7                  |
| Data items                         | 11 | List and define all variables for which data were sought (e.g., PICOS, funding sources) and any assumptions and simplifications made.                                                                                                                                                                       | 7-8                |
| Risk of bias in individual studies | 12 | Describe methods used for assessing risk of bias of individual studies (including specification of whether this was done at the study or outcome level), and how this information is to be used in any data synthesis.                                                                                      |                    |
| Summary measures                   | 13 | State the principal summary measures (e.g., risk ratio, difference in means).                                                                                                                                                                                                                               | 6                  |
| Synthesis of results               | 14 | Describe the methods of handling data and combining results of studies, if done, including measures of consistency (e.g., $I^2$ ) for each meta-analysis.                                                                                                                                                   | 8                  |

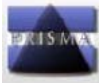

# PRISMA 2009 Checklist

Page 1 of 2

| Section/topic                 | #  | Checklist item                                                                                                                                                                                           | Reported on page # |
|-------------------------------|----|----------------------------------------------------------------------------------------------------------------------------------------------------------------------------------------------------------|--------------------|
| Risk of bias across studies   | 15 | Specify any assessment of risk of bias that may affect the cumulative evidence (e.g., publication bias, selective reporting within studies).                                                             |                    |
| Additional analyses           | 16 | Describe methods of additional analyses (e.g., sensitivity or subgroup analyses, meta-regression), if done, indicating which were pre-specified.                                                         | 7-8                |
| <b>RESULTS</b>                |    |                                                                                                                                                                                                          |                    |
| Study selection               | 17 | Give numbers of studies screened, assessed for eligibility, and included in the review, with reasons for exclusions at each stage, ideally with a flow diagram.                                          | 7,9                |
| Study characteristics         | 18 | For each study, present characteristics for which data were extracted (e.g., study size, PICOS, follow-up period) and provide the citations.                                                             | 19                 |
| Risk of bias within studies   | 19 | Present data on risk of bias of each study and, if available, any outcome level assessment (see item 12).                                                                                                | 9                  |
| Results of individual studies | 20 | For all outcomes considered (benefits or harms), present, for each study: (a) simple summary data for each intervention group (b) effect estimates and confidence intervals, ideally with a forest plot. | 9 (fig 1)          |
| Synthesis of results          | 21 | Present results of each meta-analysis done, including confidence intervals and measures of consistency.                                                                                                  | 9                  |
| Risk of bias across studies   | 22 | Present results of any assessment of risk of bias across studies (see Item 15).                                                                                                                          |                    |
| Additional analysis           | 23 | Give results of additional analyses, if done (e.g., sensitivity or subgroup analyses, meta-regression [see Item 16]).                                                                                    | 9-10               |
| <b>DISCUSSION</b>             |    |                                                                                                                                                                                                          |                    |
| Summary of evidence           | 24 | Summarize the main findings including the strength of evidence for each main outcome; consider their relevance to key groups (e.g., healthcare providers, users, and policy makers).                     | 12                 |
| Limitations                   | 25 | Discuss limitations at study and outcome level (e.g., risk of bias), and at review-level (e.g., incomplete retrieval of identified research, reporting bias).                                            | 12                 |
| Conclusions                   | 26 | Provide a general interpretation of the results in the context of other evidence, and implications for future research.                                                                                  | 12-14              |
| <b>FUNDING</b>                |    |                                                                                                                                                                                                          |                    |
| Funding                       | 27 | Describe sources of funding for the systematic review and other support (e.g., supply of data); role of funders for the systematic review.                                                               | 1                  |

From: Moher D, Liberati A, Tetzlaff J, Altman DG, The PRISMA Group (2009). Preferred Reporting Items for Systematic Reviews and Meta-Analyses: The PRISMA Statement. PLoS Med 6(6): e1000097. doi:10.1371/journal.pmed1000097

For more information, visit: [www.prisma-statement.org](http://www.prisma-statement.org).

Page 2 of 2
